# Supplementary material for: Stochastic bond dynamics facilitates alignment of malaria parasite at erythrocyte membrane upon invasion
Source: eLife journal article supplement (doi:10.7554/elife.56500), 2020-05-18
Supplement: fig5-data1 [file boxplot_bonds.xlsx]

## Sheet: Sheet1
index	bonds
1	22
1	20
1	20
1	24
1	22
1	21
1	17
1	17
1	19
1	27
1	16
1	18
1	16
1	14
1	20
1	20
1	21
1	23
1	22
1	22
1	22
1	15
1	13
1	16
1	15
1	18
1	14
1	21
1	24
1	24
1	22
1	20
1	16
1	15
1	16
1	18
1	21
1	21
1	18
1	18
1	22
1	22
1	17
1	22
1	27
1	33
1	24
1	22
1	22
1	28
1	23
1	19
1	21
1	20
1	15
1	12
1	17
1	16
1	17
1	19
1	19
1	23
1	25
1	25
1	27
1	23
1	21
1	20
1	19
1	20
1	19
1	21
1	18
1	24
1	23
1	17
1	19
1	17
1	20
1	18
1	25
1	19
1	18
1	13
1	14
1	17
1	23
1	25
1	23
1	15
1	24
1	18
1	19
1	12
1	15
1	18
1	27
1	19
1	19
1	17
1	20
1	22
1	22
1	23
1	19
1	21
1	25
1	19
1	23
1	24
1	25
1	26
1	23
1	24
1	16
1	18
1	19
1	16
1	21
1	20
1	23
1	18
1	23
1	27
1	24
1	17
1	23
1	25
1	22
1	20
1	23
1	22
1	22
1	26
1	24
1	16
1	20
1	18
1	16
1	19
1	22
1	26
1	24
1	18
1	21
1	18
1	14
1	18
1	22
1	21
1	21
1	20
1	22
1	16
1	18
1	19
1	26
1	20
1	13
1	23
1	20
1	16
1	14
1	21
1	25
1	21
1	18
1	18
1	24
1	23
1	28
1	24
1	29
1	21
1	19
1	19
1	19
1	23
1	27
1	26
1	26
1	29
1	31
1	30
1	29
1	23
1	25
1	18
1	20
1	24
1	20
1	14
1	19
1	22
1	18
1	23
1	17
1	17
1	23
1	20
1	22
1	17
1	21
1	23
1	23
1	25
1	27
1	24
1	22
1	16
1	23
1	16
1	23
1	21
1	20
1	26
1	20
1	18
1	18
1	17
1	22
1	20
1	25
1	25
1	19
1	21
1	19
1	22
1	23
1	19
1	20
1	16
1	21
1	26
1	29
1	22
1	17
1	23
1	23
1	25
1	24
1	14
1	14
1	18
1	19
1	17
1	18
1	16
1	15
1	13
1	18
1	17
1	22
1	18
1	18
1	18
1	16
1	15
1	17
1	22
1	20
1	15
1	19
1	13
1	19
1	20
1	20
1	18
1	11
1	7
1	14
1	10
1	7
1	10
1	15
1	21
1	20
1	16
1	16
1	21
1	14
1	17
1	22
1	19
1	17
1	17
1	16
1	23
1	18
1	23
1	24
1	27
1	20
1	15
1	17
1	20
1	24
1	21
1	16
1	20
1	17
1	20
1	21
1	22
1	23
1	17
1	15
1	21
1	17
1	20
1	19
1	17
1	16
1	20
1	28
1	27
1	25
1	27
1	23
1	27
1	27
1	23
1	22
1	30
1	27
1	29
1	25
1	28
1	23
1	21
1	24
1	19
1	24
1	29
1	32
1	28
1	27
1	25
1	23
1	13
1	16
1	16
1	15
1	13
1	14
1	23
1	29
1	28
1	22
1	26
1	29
1	21
1	29
1	27
1	22
1	22
1	15
1	18
1	18
1	15
1	18
1	17
1	16
1	21
1	25
1	18
1	19
1	22
1	15
1	18
1	24
1	21
1	18
1	14
1	20
1	19
1	15
1	22
1	18
1	20
1	20
1	22
1	23
1	23
1	23
1	23
1	18
1	18
1	20
1	24
1	24
1	26
1	23
1	22
1	21
1	23
1	25
1	24
1	26
1	22
1	21
1	21
1	16
1	14
1	24
1	22
1	17
1	18
1	13
1	20
1	25
1	19
1	17
1	18
1	15
1	22
1	22
1	24
1	21
1	17
1	18
1	21
1	22
1	24
1	21
1	18
1	16
1	14
1	15
1	16
1	22
1	21
1	23
1	22
1	21
1	22
1	26
1	22
1	18
1	16
1	20
1	17
1	20
1	18
1	14
1	16
1	22
1	21
1	23
1	24
1	21
1	19
1	21
1	21
1	19
1	22
1	21
1	21
1	28
1	29
1	26
1	22
1	18
1	19
1	22
1	17
1	17
1	10
1	15
1	15
1	16
1	15
1	16
1	13
1	13
1	17
1	19
1	18
1	19
1	18
1	15
1	20
1	28
1	31
1	28
1	17
1	16
1	22
1	23
1	24
1	21
1	21
1	23
1	22
1	21
1	22
1	19
1	17
1	16
1	19
1	25
1	24
1	21
1	22
1	22
1	27
1	26
1	26
1	23
1	24
1	18
1	25
1	18
1	17
1	16
1	16
1	17
1	17
1	19
1	19
1	17
1	16
1	16
1	15
1	16
1	17
1	24
1	23
1	17
1	18
1	16
1	15
1	15
1	12
1	14
1	17
1	14
1	12
1	13
1	16
1	17
1	17
1	13
1	14
1	13
1	10
1	10
1	17
1	24
1	25
1	21
1	21
1	20
1	20
1	17
1	15
1	15
1	15
1	14
1	11
1	13
1	19
1	17
1	11
1	13
1	18
1	17
1	17
1	19
1	22
1	18
1	20
1	23
1	21
1	23
1	22
1	26
1	20
1	24
1	20
1	19
1	16
1	15
1	24
1	22
1	16
1	14
1	17
1	17
1	21
1	14
1	15
1	17
1	16
1	14
1	16
1	16
1	16
1	17
1	15
1	21
1	21
1	21
1	15
1	17
1	18
1	19
1	23
1	17
1	19
1	15
1	20
1	20
1	19
1	20
1	19
1	18
1	18
1	20
1	27
1	23
1	20
1	18
1	14
1	19
1	24
1	25
1	22
1	24
1	25
1	18
1	26
1	20
1	17
1	20
1	16
1	26
1	27
1	21
1	20
1	17
1	22
1	22
1	26
1	26
1	26
1	25
1	31
1	27
1	27
1	33
1	29
1	26
1	29
1	26
1	25
1	24
1	26
1	28
1	23
1	24
1	20
1	26
1	20
1	16
1	17
1	19
1	17
1	16
1	23
1	24
1	22
1	21
1	19
1	11
1	21
1	25
1	28
1	24
1	27
1	25
1	27
1	19
1	23
1	17
1	22
1	21
1	25
1	26
1	25
1	19
1	28
1	19
1	15
1	18
1	13
1	16
1	14
1	16
1	13
1	16
1	18
1	19
1	26
1	22
1	23
1	24
1	18
1	14
1	16
1	18
1	21
1	24
1	19
1	24
1	18
1	18
1	19
1	23
1	28
1	29
1	26
1	22
1	23
1	21
1	13
1	21
1	17
1	15
1	17
1	21
1	15
1	17
1	19
1	15
1	17
1	21
1	18
1	18
1	23
1	15
1	18
1	21
1	19
1	22
1	13
1	13
1	14
1	13
1	13
1	16
1	15
1	14
1	13
1	10
1	10
1	14
1	12
1	16
1	15
1	16
1	16
1	23
1	24
1	23
1	28
1	21
1	17
1	25
1	24
1	21
1	24
1	27
1	15
1	17
1	17
1	17
1	23
1	27
1	29
1	27
1	24
1	27
1	25
1	37
1	39
1	36
1	30
1	19
1	25
1	22
1	20
1	23
1	32
1	28
1	24
1	19
1	22
1	29
1	24
1	19
1	23
1	22
1	23
1	20
1	21
1	20
1	19
1	19
1	18
1	15
1	14
1	17
1	14
1	9
1	16
1	17
1	16
1	19
1	18
1	22
1	23
1	20
1	18
1	17
1	18
1	18
1	22
1	17
1	24
1	27
1	19
1	23
1	23
1	29
1	30
1	21
1	18
1	14
1	21
1	16
1	11
1	12
1	16
1	13
1	17
1	19
1	17
1	11
1	14
1	18
1	19
1	24
1	22
1	16
1	19
1	19
1	19
1	22
1	17
1	19
1	14
1	14
1	17
1	23
1	25
1	27
1	19
1	21
1	23
1	19
1	17
1	23
1	22
1	19
1	22
1	22
1	19
1	18
1	17
1	19
1	23
1	25
1	27
1	22
1	17
1	16
1	21
1	20
1	30
1	29
1	31
1	32
1	28
1	26
1	21
1	20
1	19
1	20
1	17
1	20
1	22
1	25
1	15
1	19
1	19
1	22
1	20
1	20
1	22
1	17
1	19
1	19
1	19
1	15
1	13
1	15
1	13
1	19
1	19
1	17
1	16
1	21
1	20
1	22
1	21
1	20
1	15
1	21
1	26
1	24
1	25
1	20
1	23
1	20
1	15
1	16
1	23
1	20
1	18
1	19
1	17
1	24
1	24
1	23
1	20
1	18
1	17
1	20
1	20
1	14
1	13
1	18
1	13
1	14
1	20
1	18
1	19
1	23
1	23
1	21
1	18
1	13
1	14
1	13
1	11
1	13
1	15
1	20
1	18
1	23
1	18
1	20
1	25
1	21
1	20
1	21
1	22
1	21
1	28
1	28
1	27
1	22
1	19
1	22
1	24
1	23
1	19
1	22
1	22
1	21
1	21
1	16
1	16
1	21
1	20
1	23
1	21
1	25
1	20
1	20
1	16
1	22
1	23
1	20
1	22
1	23
1	19
1	24
1	22
1	24
1	29
1	26
1	22
1	21
1	16
1	24
1	17
1	16
1	17
1	17
1	16
1	15
1	12
1	11
1	14
1	20
1	16
1	19
1	19
1	21
1	22
1	19
1	12
1	15
1	18
1	19
1	19
1	13
1	15
1	17
1	20
1	19
1	23
1	22
1	23
1	20
1	17
1	17
1	22
1	20
1	20
1	21
1	18
1	13
1	18
1	15
1	14
1	22
1	23
1	23
1	19
1	21
1	22
1	21
1	22
1	24
1	20
1	26
1	27
1	24
1	23
1	22
1	16
1	17
1	20
1	20
1	18
1	23
1	23
1	25
1	18
1	17
1	21
1	15
1	21
1	20
1	25
1	16
1	19
1	22
1	22
1	26
1	23
1	19
1	24
1	17
1	21
1	22
1	19
1	17
1	28
1	26
1	30
1	31
1	20
1	25
1	21
1	23
1	19
1	23
1	23
1	29
1	24
1	24
1	21
1	25
1	26
1	31
1	29
1	23
1	16
1	22
1	20
1	23
1	18
1	22
1	21
1	18
1	21
1	20
1	20
1	18
1	16
1	24
1	18
1	24
1	14
1	15
1	17
1	19
1	23
1	23
1	21
1	18
1	19
1	24
1	19
1	20
1	20
1	22
1	23
1	24
1	21
1	17
1	20
1	26
1	18
1	19
1	19
1	21
1	15
1	13
1	12
1	13
1	17
1	18
1	27
1	26
1	22
1	21
1	26
1	21
1	17
1	16
1	10
1	15
1	18
1	20
1	23
1	19
1	24
1	17
1	17
1	15
1	16
1	15
1	20
1	20
1	18
1	21
1	16
1	18
1	20
1	19
1	18
1	21
1	21
1	14
1	16
1	15
1	18
1	23
1	23
1	20
1	21
1	16
1	23
1	17
1	13
1	23
1	16
1	14
1	17
1	18
1	21
1	19
1	17
1	12
1	13
1	14
1	14
1	19
1	21
1	21
1	19
1	22
1	22
1	20
1	14
1	16
1	18
1	16
1	19
1	18
1	13
1	18
1	19
1	15
1	21
1	19
1	17
1	16
1	17
1	8
1	12
1	13
1	11
1	13
1	16
1	19
1	21
1	16
1	15
1	11
1	15
1	16
1	19
1	16
1	18
1	14
1	18
1	18
1	19
1	18
1	17
1	13
1	16
1	16
1	19
1	20
1	21
1	21
1	21
1	20
1	15
1	16
1	17
1	17
1	17
1	22
1	25
1	27
1	21
1	21
1	19
1	19
1	21
1	19
1	23
1	19
1	28
1	23
1	18
1	20
1	22
1	21
1	24
1	23
1	23
1	18
1	17
1	16
1	19
1	19
1	17
1	14
1	15
1	19
1	19
1	16
1	20
1	18
1	17
1	21
1	23
1	27
1	21
1	22
1	19
1	18
1	22
1	23
1	27
1	23
1	16
1	20
1	16
1	19
1	18
1	18
1	18
1	26
1	22
1	25
1	24
1	18
1	19
1	22
1	25
1	21
1	20
1	22
1	23
1	21
1	17
1	14
1	18
1	17
1	18
1	17
1	17
1	14
1	18
1	21
1	23
1	20
1	26
1	23
1	23
1	18
1	15
1	22
1	20
1	19
1	19
1	26
1	27
1	34
1	29
1	23
1	29
1	24
1	23
1	21
1	25
1	17
1	23
1	16
1	15
1	16
1	21
1	16
1	20
1	18
1	17
1	23
1	20
1	17
1	18
1	17
1	15
1	15
1	20
1	15
1	22
1	22
1	19
1	20
1	21
1	20
1	19
1	20
1	18
1	18
1	15
1	15
1	14
1	19
1	21
1	25
1	21
1	26
1	21
1	23
1	26
1	26
1	24
1	24
1	19
1	16
1	21
1	21
1	22
1	21
1	16
1	27
1	25
1	29
1	27
1	26
1	23
1	26
1	29
1	26
1	26
1	33
1	34
1	33
1	28
1	22
1	22
1	22
1	24
1	32
1	26
1	20
1	19
1	17
1	22
1	23
1	25
1	29
1	22
1	25
1	30
1	23
1	22
1	23
1	25
1	18
1	25
1	28
1	23
1	18
1	17
1	22
1	27
1	22
1	20
1	21
1	28
1	26
1	24
1	20
1	22
1	21
1	21
1	22
1	20
1	19
1	19
1	17
1	15
1	19
1	24
1	17
1	17
1	11
1	10
1	11
1	16
1	15
1	15
1	16
1	25
1	25
1	25
1	21
1	20
1	24
1	21
1	22
1	24
1	20
1	26
1	21
1	16
1	15
1	17
1	20
1	13
1	16
1	14
1	19
1	15
1	22
1	16
1	19
1	16
1	11
1	15
1	17
1	18
1	14
1	23
1	23
1	18
1	19
1	22
1	17
1	18
1	19
1	22
1	25
1	25
1	24
1	24
1	18
1	18
1	20
1	16
1	20
1	21
1	22
1	20
1	18
1	22
1	15
1	15
1	12
1	15
1	16
1	18
1	21
1	12
1	12
1	17
1	18
1	20
1	21
1	15
1	16
1	13
1	13
1	14
1	14
1	17
1	15
1	23
1	23
1	23
1	17
1	20
1	11
1	17
1	19
1	18
1	20
1	18
1	16
1	15
1	14
1	25
1	25
1	20
1	24
1	22
1	20
1	21
1	23
1	25
1	18
1	19
1	21
1	23
1	24
1	19
1	21
1	24
1	25
1	24
1	23
1	22
1	22
1	21
1	17
1	20
1	17
1	25
1	24
1	20
1	18
1	14
1	19
1	14
1	19
1	16
1	14
1	17
1	16
1	20
1	17
1	20
1	19
1	16
1	28
1	22
1	19
1	16
1	16
1	16
1	14
1	11
1	14
1	15
1	18
1	25
1	25
1	22
1	29
1	25
1	26
1	23
1	21
1	18
1	22
1	20
1	27
1	30
1	25
1	28
1	26
1	19
1	30
1	18
1	15
1	21
1	23
1	25
1	23
1	25
1	23
1	26
1	20
1	19
1	22
1	22
1	21
1	17
1	22
1	19
1	21
1	19
1	22
1	25
1	29
1	25
1	23
1	24
1	26
1	17
1	19
1	18
1	22
1	25
1	27
1	22
1	15
1	21
1	21
1	19
1	16
1	20
1	20
1	17
1	23
1	22
1	22
1	19
1	16
1	24
1	24
1	19
1	19
1	15
1	20
1	21
1	24
1	19
1	23
1	20
1	16
1	24
1	19
1	22
1	21
1	17
1	17
1	17
1	16
1	15
1	17
1	15
1	18
1	16
1	14
1	11
1	18
1	14
1	14
1	17
1	15
1	18
1	9
1	15
1	16
1	15
1	23
1	19
1	22
1	23
1	21
1	24
1	20
1	25
1	23
1	20
1	17
1	19
1	24
1	24
1	23
1	19
1	21
1	24
1	28
1	22
1	19
1	27
1	23
1	22
1	24
1	27
1	22
1	21
1	19
1	25
1	25
1	24
1	22
1	19
1	20
1	22
1	24
1	20
1	18
1	18
1	21
1	22
1	17
1	21
1	19
1	25
1	24
1	19
1	23
1	20
1	22
1	27
1	20
1	16
1	19
1	21
1	19
1	16
1	17
1	17
1	19
1	16
1	16
1	23
1	19
1	26
1	27
1	25
1	25
1	22
1	20
1	20
1	14
1	16
1	18
1	19
1	16
1	16
1	20
1	23
1	16
1	20
1	17
1	11
1	14
1	20
1	19
1	15
1	19
1	20
1	26
1	24
1	24
1	20
1	21
1	16
1	18
1	13
1	14
1	13
1	17
1	16
1	14
1	13
1	12
1	11
1	9
1	13
1	15
1	19
1	21
1	16
1	13
1	9
1	10
1	17
1	18
1	12
1	12
1	11
1	17
1	22
1	22
1	21
1	19
1	21
1	21
1	22
1	25
1	18
1	19
1	15
1	15
1	17
1	17
1	25
1	22
1	21
1	20
1	18
1	22
1	20
1	25
1	21
1	21
1	17
1	23
1	22
1	21
1	25
1	22
1	26
1	20
1	17
1	19
1	20
1	22
1	15
1	19
1	19
1	22
1	19
1	24
1	23
1	17
1	22
1	24
1	18
1	14
1	20
1	26
1	26
1	24
1	26
1	21
1	16
1	23
1	21
1	17
1	18
1	18
1	20
1	13
1	13
1	21
1	22
1	23
1	22
1	19
1	19
1	18
1	16
1	19
1	24
1	24
1	18
1	20
1	17
1	26
1	22
1	18
1	19
1	17
1	20
1	21
1	24
1	21
1	22
1	21
1	20
1	22
1	20
1	24
1	12
1	17
1	16
1	18
1	15
1	22
1	23
1	22
1	24
1	21
1	25
1	22
1	22
1	29
1	26
1	24
1	25
1	19
1	25
1	23
1	19
1	16
1	20
1	23
1	19
1	23
1	19
1	19
1	22
1	22
1	25
1	23
1	26
1	26
1	19
1	25
1	22
1	28
1	24
1	27
1	27
1	26
1	21
1	27
1	28
1	21
1	21
1	20
[truncated: 4,004 more rows]
