# Supplementary material for: Stochastic bond dynamics facilitates alignment of malaria parasite at erythrocyte membrane upon invasion
Source: eLife journal article supplement (doi:10.7554/elife.56500), 2020-05-18
Supplement: fig5-data1 [file boxplot_deform_energy.xlsx]

## Sheet: Sheet1
index	energy
1	48.6415
1	103.265
1	99.7962
1	67.8179
1	134.134
1	156.967
1	143.141
1	213.996
1	216.628
1	160.627
1	164.929
1	189.332
1	146.079
1	243.709
1	208.503
1	213.365
1	171.532
1	242.86
1	252.12
1	128.692
1	187.653
1	128.873
1	135.028
1	75.4153
1	106.296
1	113.491
1	89.5292
1	86.4087
1	90.8834
1	26.8488
1	42.1424
1	78.2887
1	164.168
1	118.316
1	206.912
1	76.1887
1	71.7411
1	164.927
1	187.821
1	122.295
1	198.062
1	217.36
1	188.727
1	246.351
1	90.7416
1	103.298
1	160.437
1	59.4768
1	147.148
1	110.11
1	162.286
1	133.26
1	62.4819
1	96.1441
1	149.193
1	113.75
1	54.6985
1	126.608
1	133.061
1	92.2824
1	122.621
1	210.985
1	121.768
1	166.458
1	122.845
1	174.108
1	166.269
1	157.949
1	145.736
1	197.197
1	92.7572
1	143.197
1	200.074
1	69.4132
1	211.206
1	162.002
1	132.75
1	31.8923
1	153.992
1	230.553
1	158.735
1	116.633
1	221.922
1	144.429
1	128.121
1	159.506
1	198.075
1	109.56
1	93.9883
1	100.373
1	140.301
1	196.802
1	140.836
1	66.3769
1	98.6923
1	62.3365
1	196.44
1	146.042
1	118.302
1	136.472
1	76.7056
1	160.858
1	154.6
1	151.421
1	176.164
1	168.68
1	310.331
1	194.156
1	141.151
1	104.443
1	150.917
1	156.552
1	116.585
1	178.881
1	252.512
1	97.7699
1	153.01
1	128.625
1	113.959
1	186.27
1	246.944
1	215.58
1	295.242
1	156.282
1	147.082
1	194.724
1	137.814
1	225.292
1	129.77
1	271.987
1	166.718
1	167.074
1	139.395
1	243.192
1	138.285
1	117.606
1	82.2408
1	118.071
1	109.866
1	98.9645
1	112.449
1	154.752
1	112.183
1	151.918
1	155.172
1	191.013
1	37.0655
1	127.064
1	42.2874
1	199.532
1	105.842
1	133.727
1	171.349
1	171.498
1	114.527
1	131.95
1	176.029
1	115.185
1	126.687
1	125.888
1	137.008
1	117.081
1	33.8697
1	114.597
1	23.42
1	50.9621
1	113.79
1	141.264
1	194.119
1	171.648
1	161.295
1	172.606
1	159.333
1	11.7315
1	117.494
1	50.9134
1	74.1742
1	82.514
1	59.1032
1	97.5462
1	227.66
1	169.114
1	226.402
1	242.31
1	145.286
1	119.067
1	183.312
1	138.648
1	170.455
1	147.322
1	162.147
1	136.806
1	167.978
1	211.029
1	164.918
1	99.5979
1	147.801
1	128.182
1	115.619
1	222.267
1	164.211
1	187.914
1	152.53
1	201.685
1	149.629
1	111.739
1	158.954
1	53.0343
1	159.394
1	120.042
1	129.752
1	36.6818
1	92.9802
1	150.006
1	94.6912
1	123.836
1	78.055
1	98.5051
1	105.904
1	131.538
1	70.9944
1	41.9907
1	116.67
1	108.236
1	157.198
1	141.469
1	94.3285
1	145.076
1	251.175
1	213.709
1	184.816
1	81.17
1	152.368
1	154.208
1	183.355
1	240.402
1	255.956
1	189.868
1	221.113
1	65.7231
1	123.663
1	124.185
1	119.321
1	109.495
1	102.489
1	35.8069
1	75.7091
1	65.1849
1	50.1887
1	52.2746
1	101.015
1	17.9354
1	71.3632
1	84.4348
1	89.7723
1	93.0033
1	132.439
1	142.748
1	65.9897
1	85.2555
1	192.874
1	186.854
1	153.79
1	175.655
1	157.686
1	69.5458
1	125.028
1	112.434
1	88.0518
1	57.9576
1	160.266
1	170.224
1	72.3808
1	122.14
1	170.94
1	179.34
1	128.606
1	95.9749
1	195.471
1	62.4514
1	82.1884
1	176.374
1	138.877
1	135.285
1	187.131
1	172.187
1	151.142
1	184.508
1	252.571
1	113.712
1	184.768
1	23.5517
1	134.896
1	96.3686
1	154.284
1	50.5248
1	55.7286
1	128.734
1	116.481
1	89.038
1	71.0837
1	35.8006
1	83.5065
1	96.5378
1	12.9111
1	-4.09572
1	116.344
1	43.6246
1	54.2794
1	47.1784
1	8.69073
1	102.727
1	79.3328
1	189.557
1	58.8733
1	91.1841
1	117.054
1	147.848
1	102.229
1	156.979
1	152.274
1	167.429
1	268.202
1	244.641
1	167.131
1	193.383
1	339.797
1	294.394
1	182.441
1	111.655
1	141.428
1	198.811
1	228.531
1	168.138
1	158.555
1	254.467
1	220.452
1	161.928
1	205.896
1	177.58
1	131.663
1	177.668
1	60.8337
1	125.26
1	49.275
1	195.258
1	197.668
1	136.649
1	62.122
1	158.436
1	184.412
1	136.927
1	125.402
1	140.628
1	184.516
1	119.955
1	83.0822
1	56.6474
1	118.901
1	185.737
1	274.381
1	117.155
1	80.4132
1	111.137
1	132.157
1	232.06
1	183.893
1	100.383
1	9.99063
1	144.129
1	69.1868
1	95.5217
1	85.5422
1	150.216
1	72.3802
1	139.312
1	175.184
1	188.615
1	219.893
1	203.078
1	72.8085
1	158.331
1	177.324
1	128.689
1	218.524
1	243.419
1	279.518
1	207.73
1	138.13
1	227.348
1	210.707
1	113.421
1	93.5298
1	247.507
1	168.301
1	232.6
1	204.765
1	104.528
1	109.055
1	226.294
1	110.766
1	143.958
1	48.8529
1	130.648
1	180.511
1	116.381
1	196.819
1	58.686
1	94.1611
1	54.0372
1	58.1705
1	100.9
1	85.3507
1	109.684
1	163.471
1	147.1
1	74.0134
1	175.902
1	212.747
1	58.0921
1	124.919
1	144.311
1	151.991
1	191.652
1	132.318
1	135.761
1	222.197
1	71.3925
1	106.891
1	189.981
1	188.953
1	70.6327
1	178.547
1	222.327
1	212.132
1	258.835
1	177.9
1	214.764
1	112.103
1	255.407
1	137.353
1	156.3
1	175.904
1	162.985
1	156.985
1	263.296
1	208.901
1	104.766
1	198.236
1	58.3844
1	193.577
1	132.863
1	248.203
1	79.5341
1	62.684
1	140.162
1	90.4704
1	-29.6486
1	81.5719
1	132.284
1	152.733
1	154.248
1	64.7693
1	135.858
1	24.6709
1	148.654
1	9.24357
1	23.3149
1	94.8923
1	55.3733
1	123.555
1	113.508
1	-6.50356
1	57.4158
1	132.716
1	97.3345
1	144.661
1	125.223
1	110.442
1	115.713
1	186.408
1	169.275
1	190.025
1	247.602
1	139.757
1	145.937
1	149.269
1	125.604
1	190.062
1	89.1771
1	189.09
1	161.266
1	82.2483
1	198.662
1	167.788
1	180.208
1	188.199
1	101.71
1	226.612
1	261.125
1	192.152
1	132.152
1	77.2902
1	169.696
1	110.349
1	153.397
1	170.674
1	127.776
1	151.125
1	156.628
1	131.396
1	180.964
1	131.044
1	70.0492
1	126.503
1	135.023
1	9.96673
1	186.536
1	92.8912
1	140.088
1	109.552
1	153.813
1	90.8582
1	64.3366
1	81.1098
1	229.597
1	125.571
1	121.221
1	90.3189
1	150.956
1	111.671
1	98.0671
1	162.514
1	84.0256
1	227.389
1	58.1495
1	107.988
1	72.6608
1	158.402
1	138.454
1	64.7613
1	110.62
1	94.512
1	-14.5678
1	141.182
1	132.05
1	127.816
1	142.046
1	119.398
1	184.778
1	173.413
1	202.495
1	162.468
1	123.988
1	237.429
1	78.5819
1	59.7435
1	107.705
1	17.8358
1	136.002
1	136.153
1	64.124
1	86.0554
1	44.3469
1	109.442
1	112.074
1	32.953
1	144.708
1	56.6414
1	80.7923
1	208.036
1	183.062
1	221.452
1	167.894
1	173.411
1	173.23
1	112.103
1	199.737
1	195.139
1	163.109
1	110.773
1	102.773
1	157.416
1	117.283
1	59.6025
1	126.62
1	132.586
1	124.653
1	105.872
1	95.2597
1	115.352
1	126.722
1	102.609
1	78.619
1	128.13
1	185.626
1	161.552
1	31.2616
1	-14.5957
1	76.4496
1	83.6936
1	33.696
1	130.658
1	60.3829
1	46.4071
1	144.331
1	65.1418
1	64.3282
1	180.876
1	157.228
1	86.5557
1	98.8085
1	34.6688
1	126.283
1	132.826
1	107.891
1	126.893
1	198.286
1	165.089
1	175.766
1	181.157
1	80.2459
1	163.627
1	134.244
1	236.382
1	144.509
1	89.1362
1	121.048
1	161.429
1	132.29
1	139.033
1	118.303
1	234.051
1	110.831
1	95.2446
1	314.478
1	246.485
1	185.477
1	199.279
1	97.4359
1	77.1034
1	171.675
1	218.878
1	217.035
1	139.307
1	147.534
1	217.137
1	286.304
1	197.74
1	219.816
1	218.81
1	189.707
1	226.934
1	248.383
1	211.382
1	222.876
1	160.9
1	232.706
1	199.409
1	195.114
1	149.133
1	127.536
1	165.303
1	157.476
1	133.573
1	112.076
1	122.631
1	130.731
1	146.31
1	101.507
1	53.3518
1	45.9369
1	85.4932
1	184.167
1	129.068
1	143.724
1	126.895
1	89.7038
1	208.843
1	183.11
1	164.563
1	238.044
1	188.393
1	170.122
1	250.945
1	218.196
1	194.617
1	99.9972
1	101.265
1	111.684
1	179.527
1	110.015
1	163.38
1	124.336
1	214.992
1	134.089
1	183.218
1	144.365
1	100.629
1	151.817
1	192.045
1	77.6097
1	137.403
1	107.318
1	215.345
1	153.058
1	175.332
1	190.722
1	142.62
1	169.261
1	215.327
1	164.678
1	270.503
1	207.033
1	212.302
1	112.116
1	205.442
1	186.651
1	232.199
1	205.432
1	318.369
1	135.72
1	173.227
1	135.581
1	168.616
1	229.303
1	191.403
1	79.6236
1	194.881
1	142.364
1	120.276
1	19.181
1	78.8412
1	67.3097
1	63.703
1	137.771
1	39.5979
1	56.9425
1	19.9911
1	91.6141
1	53.8193
1	158.958
1	169.81
1	167.794
1	85.5332
1	161.856
1	86.6469
1	146.137
1	160.655
1	28.5909
1	182.461
1	153.172
1	131.751
1	56.699
1	129.585
1	35.4303
1	153.477
1	130.768
1	86.2875
1	60.5958
1	106.425
1	86.6475
1	97.8702
1	70.5303
1	152.102
1	144.023
1	225.933
1	137.01
1	200.936
1	113.399
1	148.028
1	201.664
1	157.331
1	146.296
1	198.128
1	218.002
1	80.8332
1	252.723
1	240.573
1	186.399
1	172.365
1	195.666
1	195.618
1	247.01
1	233.586
1	281.642
1	316.673
1	222.808
1	197.692
1	311.343
1	182.546
1	168.59
1	135.281
1	179.998
1	223.377
1	123.696
1	101.377
1	189.304
1	160.257
1	139.697
1	163.174
1	218.112
1	197.669
1	122.198
1	72.0694
1	99.2986
1	74.7966
1	165.886
1	25.4889
1	93.1272
1	62.5625
1	118.8
1	144.961
1	116.738
1	143.919
1	40.1249
1	152.088
1	97.3863
1	164.773
1	197.673
1	216.752
1	292.056
1	216.748
1	189.459
1	204.444
1	192.717
1	167.839
1	231.269
1	138.648
1	183.584
1	187.599
1	160.707
1	198.539
1	193.532
1	288.451
1	132.861
1	140.223
1	162.111
1	111.1
1	207.036
1	214.271
1	63.4626
1	102.234
1	80.9491
1	60.3388
1	111.955
1	130.829
1	101.122
1	64.9281
1	135.006
1	107.893
1	55.3106
1	108.83
1	15.761
1	108.398
1	144.06
1	64.8316
1	166.813
1	132.4
1	120.923
1	38.9959
1	134.219
1	137.396
1	93.9645
1	125.655
1	182.087
1	248.99
1	184.46
1	140.874
1	142.594
1	148.794
1	165.598
1	162.407
1	176.637
1	114.195
1	170.074
1	93.9753
1	69.168
1	141.301
1	160.608
1	144.997
1	221.302
1	285.343
1	206.62
1	165.365
1	110.019
1	222.692
1	134.36
1	215.307
1	189.047
1	336.02
1	277.584
1	116.912
1	200.985
1	172.1
1	185.93
1	191.677
1	223.978
1	221.529
1	129.152
1	203.829
1	142.359
1	109.425
1	139.541
1	187.313
1	184.227
1	185.62
1	158.494
1	166.428
1	187.264
1	146.61
1	91.8792
1	129.15
1	119.838
1	102.293
1	119.625
1	106.18
1	127.042
1	76.2408
1	53.342
1	126.445
1	130.668
1	171.247
1	56.3134
1	167.83
1	-0.972236
1	134.116
1	118.726
1	179.367
1	163.305
1	93.8096
1	236.826
1	151.287
1	198.84
1	67.2203
1	108.682
1	109.554
1	109.516
1	79.393
1	88.5324
1	62.5994
1	70.5412
1	127.034
1	179.409
1	70.6482
1	59.3871
1	138.768
1	190.266
1	148.927
1	148.007
1	95.8017
1	63.0875
1	93.7986
1	74.723
1	193.212
1	221.37
1	177.529
1	147.59
1	118.112
1	147.93
1	139.178
1	81.3037
1	78.3477
1	1.68181
1	105.408
1	-20.0812
1	78.2423
1	158.111
1	14.3249
1	166.48
1	182.2
1	156.555
1	228.765
1	124.982
1	137.997
1	198.802
1	60.9532
1	107.944
1	247.334
1	65.7976
1	184.638
1	137.195
1	196.146
1	92.7925
1	3.81487
1	134.636
1	84.5453
1	166.143
1	108.999
1	176.995
1	146.672
1	151.571
1	60.8685
1	163.212
1	222.194
1	182.194
1	97.3228
1	187.947
1	170.84
1	68.1378
1	222.639
1	192.749
1	122.734
1	165.038
1	107.507
1	191.272
1	133.196
1	68.2529
1	41.1359
1	149.051
1	160.466
1	150.029
1	173.531
1	19.4349
1	130.517
1	191.363
1	219.184
1	167.064
1	150.865
1	91.7657
1	71.6815
1	55.2059
1	113.779
1	156.815
1	112.935
1	126.334
1	121.245
1	101.911
1	90.2303
1	142.036
1	153.564
1	185.997
1	222.655
1	275.935
1	225.24
1	166.301
1	75.6996
1	140.324
1	115.827
1	82.7963
1	47.6696
1	85.144
1	53.9456
1	38.424
1	30.7692
1	11.2316
1	43.2127
1	85.3677
1	189.606
1	144.151
1	136.476
1	169.369
1	116.377
1	18.4282
1	117.469
1	119.419
1	160.117
1	127.277
1	136.492
1	114.309
1	155.765
1	269.004
1	216.623
1	77.2768
1	110.328
1	172.403
1	104.037
1	127.248
1	148.026
1	150.487
1	89.2623
1	92.8878
1	129.339
1	44.5753
1	209.821
1	166.783
1	90.1103
1	52.0636
1	178.388
1	198.992
1	147.398
1	124.233
1	126.141
1	141.758
1	79.15
1	91.6663
1	147.825
1	211.275
1	141.158
1	167.707
1	223.867
1	230.407
1	157.791
1	165.392
1	327.82
1	223.527
1	249.536
1	128.613
1	132.638
1	143.712
1	146.796
1	287.426
1	190.29
1	140.76
1	213.634
1	185.229
1	101.351
1	121.513
1	114.188
1	111.392
1	155.088
1	152.054
1	226.106
1	146.629
1	118.785
1	194.998
1	206.632
1	135.447
1	122.521
1	211.934
1	208.436
1	310.934
1	186.806
1	223.221
1	167.332
1	256.867
1	292.122
1	213.256
1	190.579
1	218.69
1	163.377
1	190.665
1	192.301
1	249.88
1	151.668
1	149.92
1	168.836
1	262.861
1	202.858
1	254.655
1	66.1847
1	118.42
1	101.989
1	102.342
1	171.694
1	109.392
1	42.4011
1	110.09
1	202.653
1	87.6851
1	94.6408
1	156.774
1	36.8174
1	163.291
1	165.735
1	136.008
1	186.529
1	117.75
1	53.0407
1	71.7786
1	110.691
1	59.7528
1	92.8263
1	64.4345
1	95.4188
1	70.9788
1	131.799
1	127.131
1	132.485
1	110.358
1	251.164
1	139.935
1	111.496
1	110.59
1	87.0437
1	83.0644
1	98.9893
1	56.9498
1	-11.0612
1	92.7363
1	151.762
1	205.569
1	52.4921
1	111.045
1	219.953
1	172.965
1	193.894
1	182.522
1	239.755
1	100.018
1	64.0897
1	61.4125
1	111.756
1	135.602
1	91.0646
1	112.513
1	155.217
1	127.514
1	158.632
1	181.913
1	192.765
1	96.6222
1	146.629
1	118.375
1	118.088
1	102.31
1	70.4064
1	50.4536
1	114.205
1	121.813
1	103.93
1	77.0438
1	87.4464
1	-27.2355
1	100.477
1	99.634
1	57.7828
1	116.399
1	112.869
1	37.377
1	35.4792
1	167.146
1	34.7882
1	126.428
1	121.022
1	148.433
1	73.8732
1	86.5364
1	-13.111
1	112.252
1	105.798
1	58.7552
1	141.088
1	64.4372
1	83.7977
1	76.2624
1	155.012
1	68.4172
1	60.1681
1	70.9191
1	126.152
1	174.555
1	172.463
1	120.752
1	173.751
1	116.117
1	31.9905
1	71.6246
1	21.6347
1	95.9297
1	74.8502
1	28.8869
1	-19.68
1	108.796
1	35.4332
1	108.144
1	10.9022
1	123.525
1	124.755
1	96.7119
1	104.286
1	107
1	101.165
1	96.4793
1	108.919
1	84.9122
1	113.576
1	87.4341
1	46.5117
1	148.086
1	96.7051
1	107.227
1	233.529
1	157.484
1	173.256
1	52.8703
1	95.9485
1	118.616
1	146.46
1	218.459
1	193.967
1	170.346
1	170.026
1	144.289
1	193.745
1	217.601
1	159.282
1	106.965
1	105.269
1	130.358
1	109.013
1	142.755
1	100.01
1	172.227
1	141.242
1	161.131
1	168.698
1	146.463
1	144.453
1	90.6149
1	148.205
1	148.061
1	131.852
1	135.398
1	139.227
1	229.256
1	134.056
1	186.063
1	193.969
1	136.066
1	151.54
1	122.313
1	150.731
1	203.979
1	188.662
1	156.86
1	194.428
1	119.104
1	84.2736
1	108.975
1	189.619
1	163.404
1	71.1469
1	132.662
1	95.8931
1	80.6095
1	136.601
1	161.748
1	194.435
1	218.756
1	163.336
1	138.001
1	160.615
1	196.155
1	167.358
1	207.867
1	109.277
1	152.377
1	77.6229
1	46.5633
1	86.8295
1	32.6076
1	66.5803
1	116.662
1	218.998
1	83.8191
1	232.07
1	193.765
1	248.439
1	125.338
1	155.225
1	104.449
1	158.2
1	167.482
1	32.4783
1	143.78
1	118.116
1	238.717
1	163.41
1	137.957
1	102.969
1	93.0517
1	199.884
1	231.789
1	163.661
1	188.954
1	118.291
1	140.484
1	143.621
1	54.6913
1	159.387
1	134.523
1	225.446
1	183.687
1	78.7592
1	84.9528
1	164.807
1	97.6876
1	163.868
1	184.901
1	186.393
1	173.436
1	141.117
1	128.183
1	107.474
1	95.88
1	88.1788
1	104.39
1	158.023
1	152.896
1	89.1255
1	108.851
1	32.3683
1	89.0327
1	220.692
1	122.275
1	190.758
1	159.716
1	109.196
1	119.084
1	180.492
1	222.117
1	175.006
1	112.052
1	128.033
1	54.4334
1	90.3395
1	151.598
1	112.106
1	146.588
1	233.237
1	30.9253
1	109.147
1	104.416
1	180.542
1	218.838
1	219.252
1	128.151
1	192.668
1	103.996
1	153.068
1	162.639
1	120.716
1	87.976
1	149.843
1	192.422
1	180.3
1	248.372
1	324.782
1	221.827
1	195.199
1	328.671
1	292.911
1	213.261
1	136.452
1	197.603
1	302.95
1	299.858
1	275.572
1	242.503
1	217.087
1	151.757
1	113.202
1	218.751
1	136.324
1	181.336
1	196.026
1	127.561
1	101.416
1	128.693
1	189.135
1	148.107
1	170.313
1	195.912
1	97.9966
1	168.545
1	167.983
1	153.342
1	175.162
1	142.014
1	102.248
1	139.954
1	178.881
1	113.193
1	243.276
1	169.679
1	98.9944
1	161.865
1	192.158
1	162.012
1	167.569
1	193.651
1	88.3062
1	134.805
1	120.471
1	83.0291
1	56.1055
1	83.5346
1	132.468
1	39.7626
1	185.837
1	107.562
1	112.006
1	143.171
1	50.6373
1	65.1806
1	89.5936
1	9.85635
1	71.558
1	99.7649
1	75.6761
1	195.56
1	92.2025
1	144.077
1	102.72
1	115.159
1	145.221
1	153.628
1	117.404
1	168.03
1	208.783
1	186.959
1	166.783
1	192.883
1	139.357
1	149.058
1	105.017
1	166.279
1	147.838
1	-34.9968
1	10.896
1	69.7128
1	103.294
1	92.4702
1	49.0671
1	75.1963
1	104.871
1	64.3703
1	16.0966
1	94.1415
1	11.9651
1	152.044
1	72.9422
1	121.63
1	127.595
1	82.0243
1	123.267
1	74.206
1	146.328
1	117.393
1	112.622
1	138.367
1	134.484
1	99.9351
1	97.4796
1	58.0815
1	130.624
1	168.775
1	129.514
1	124.978
1	166.858
1	201.16
1	202.897
1	220.54
1	87.7166
1	170.382
1	103.478
1	164.493
1	96.0573
1	110.999
1	134.287
1	105.909
1	102.653
1	147.139
1	95.3552
1	99.1869
1	51.5608
1	153.931
1	127.939
1	142.725
1	55.5931
1	88.0719
1	80.3438
1	-15.0864
1	50.5721
1	84.6099
1	68.0459
1	62.9925
1	102.339
1	54.9066
1	116.362
1	61.0249
1	100.275
1	114.922
1	94.0412
1	101.176
1	166.747
1	144.758
1	119.472
1	227.094
1	89.3377
1	39.7381
1	104.386
1	153.976
1	55.5951
1	82.0887
1	141.201
1	50.8732
1	52.9679
1	84.8264
1	117.682
1	192.423
1	144.118
1	194.482
1	213.077
1	159.13
1	154.551
1	151.61
1	103.702
1	107.877
1	181.337
1	79.514
1	145.884
1	135.894
1	152.707
1	128.107
1	224.64
1	107.125
1	181.742
1	151.725
1	188.164
1	107.817
1	218.816
1	189.556
1	203.973
1	132.159
1	44.0638
1	63.0254
1	122.478
1	77.254
1	145.768
1	70.2613
1	82.2805
1	88.3815
1	67.0255
1	112.193
1	133.492
1	71.3716
1	182.163
1	127.391
1	93.5698
1	105.209
1	126.893
1	140.48
1	115.911
1	-4.57051
1	161.728
1	91.6021
1	153.63
1	248.905
1	139.935
1	230.434
1	219.071
1	248.872
1	163.867
1	254.752
1	182.503
1	225.956
1	182.144
1	221.079
1	238.765
1	201.361
1	220.835
1	221.952
1	208.634
1	87.0995
1	268.726
1	84.426
1	158.448
1	179.076
1	165.552
1	117.294
1	62.5882
1	169.601
1	159.824
1	105.4
1	180.766
1	160.363
1	83.0864
1	85.8034
1	218.175
1	154.245
1	146.787
1	247.549
1	182.19
1	192.527
1	295.148
1	169.087
1	163.136
1	188.485
1	251.188
1	204.958
1	230.594
1	219.306
1	205.899
1	216.069
1	227.344
1	208.101
1	172.913
1	239.087
1	133.943
1	113.584
1	51.2212
1	113.458
1	159.836
1	133.376
1	113.516
1	104.957
1	114.549
1	164.76
1	124.091
1	202.842
1	225.327
1	94.068
1	103.72
1	152.173
1	115.104
1	89.7561
1	84.7575
1	223.303
1	200.665
1	99.4355
1	200.981
1	104.968
1	162.174
1	121.097
1	89.3305
1	103.173
1	98.9502
1	141.918
1	165.322
1	160.9
1	202.41
1	188.653
1	136.265
1	145.715
1	103.978
1	164.518
1	47.0945
1	62.1875
1	57.2348
1	93.2276
1	80.1303
1	74.6455
1	96.4237
1	126.115
1	128.806
1	89.0405
1	108.318
1	100.481
1	198.7
1	89.4443
1	159.424
1	180.291
1	197.114
1	194.249
1	130.292
1	91.4024
1	73.1669
1	109.768
1	143.268
1	145.809
1	97.8275
1	173.611
1	49.2174
1	55.0279
1	127.272
1	153.278
1	238.293
1	277.316
1	239.621
1	164.245
1	193.72
1	169.878
1	61.2908
1	43.1254
1	129.167
1	97.6155
1	92.8152
1	133.861
1	201.268
1	56.7154
1	158.726
1	296.498
1	161.45
1	145.448
1	38.3266
1	159.087
1	206.185
1	209.542
1	166.316
1	137.51
1	186.82
1	187.827
1	193.053
1	115.887
1	112.424
1	186.223
1	133.232
1	112.276
1	114.388
1	163.09
1	94.2229
1	38.61
1	117.81
1	45.24
1	131.454
1	123.761
1	152.621
1	166.084
1	133.185
1	66.6951
1	175.086
1	136.143
1	176.817
1	90.6967
1	169.365
1	146.669
1	95.7415
1	55.7558
1	116.216
1	106.177
1	72.3023
1	69.5121
1	133.931
1	158.403
1	157.775
1	170.49
1	124.418
1	122.113
1	83.6396
1	138.061
1	116.948
1	91.0309
1	65.4452
1	193.527
1	140.435
1	149.17
1	111.124
1	74.4937
1	84.2986
1	54.8415
1	154.871
1	101.714
1	74.8437
1	114.759
1	17.1237
1	-4.8023
1	86.3482
1	103.609
1	91.9911
1	61.3615
1	-11.15
1	13.8918
1	-2.58538
1	72.6418
1	85.9426
1	88.4616
1	67.5601
1	116.491
1	89.6328
1	104.813
1	42.7762
1	117.898
1	7.83534
1	94.3915
1	129.859
1	25.1622
1	179.044
1	142.975
1	98.9782
1	109.449
1	74.2465
1	64.9404
1	132.986
1	109.311
1	196.753
1	174.295
1	60.856
1	78.4572
1	77.9804
1	117.339
1	100.188
1	90.2596
1	96.6947
1	176.537
1	136.377
1	118.442
1	235.239
1	187.304
1	99.1158
1	191.928
1	173.163
1	160.598
1	239.735
1	178.134
1	194.497
1	220.575
1	85.7536
1	181.893
1	185.232
1	82.0634
1	84.751
1	111.031
1	149.092
1	174.245
1	135.109
1	85.1004
1	132.526
1	120.294
1	139.535
1	175.267
1	80.6649
1	57.7734
1	174.842
1	186.716
1	113.107
1	201.04
1	160.049
1	229.87
1	211.021
1	148.747
1	80.1383
1	150.073
1	166.951
1	200.371
1	168.232
1	209.565
1	245.201
1	136.738
1	74.0227
1	132.453
1	217.545
1	113.606
1	89.8885
1	160.284
1	187.703
1	199.882
1	116.892
1	121.417
1	163.821
1	160.916
1	179.649
1	148.612
1	64.4258
1	152.715
1	86.4608
1	96.7782
1	175.079
1	140.982
1	103.785
1	45.2393
1	81.2341
1	69.6429
1	113.159
1	135.794
1	130.588
1	213.471
1	241.226
1	208.258
1	200.585
1	222.703
1	277.988
1	252.662
1	95.3395
1	97.5307
1	187.456
1	112.211
1	159.73
1	193.002
1	256.786
1	278.273
1	170.084
1	128.41
1	204.368
1	251.306
1	245.086
1	221.916
1	240.11
1	153.417
1	166.968
1	113.156
1	192.407
1	121.206
1	146.016
1	168.945
1	184.817
1	170.663
1	113.092
1	109.613
1	108.505
1	114.861
1	77.7459
1	164.525
1	129.678
1	191.236
1	96.3935
1	194.336
1	104.739
1	242.338
1	197.024
1	175.176
1	161.318
1	163.562
1	177.755
1	232.909
1	211.721
1	268.056
1	259.923
[truncated: 4,005 more rows]
