# Supplementary material for: Stochastic bond dynamics facilitates alignment of malaria parasite at erythrocyte membrane upon invasion
Source: eLife journal article supplement (doi:10.7554/elife.56500), 2020-05-18
Supplement: fig5-data1 [file boxplot_distance_angle.xlsx]

## Sheet: Sheet1
index	distangle	distangle1
1	0.251329	0.175747
1	0.345971	0.241928
1	0.350557	0.245135
1	0.334605	0.23398
1	0.297885	0.208303
1	0.298862	0.208986
1	0.300103	0.209854
1	0.299357	0.209332
1	0.30869	0.215859
1	0.338315	0.236574
1	0.317595	0.222085
1	0.313793	0.219427
1	0.316681	0.221446
1	0.304375	0.212841
1	0.309155	0.216183
1	0.273833	0.191484
1	0.286295	0.200199
1	0.294546	0.205968
1	0.280108	0.195872
1	0.293108	0.204962
1	0.301033	0.210504
1	0.257627	0.180151
1	0.317691	0.222153
1	0.303257	0.21206
1	0.223568	0.156335
1	0.26079	0.182363
1	0.281131	0.196587
1	0.22977	0.160672
1	0.235548	0.164712
1	0.235166	0.164445
1	0.29848	0.208719
1	0.302437	0.211486
1	0.305183	0.213406
1	0.333746	0.23338
1	0.356683	0.249419
1	0.321297	0.224674
1	0.295734	0.206799
1	0.282129	0.197285
1	0.26501	0.185314
1	0.278033	0.194421
1	0.264357	0.184858
1	0.260686	0.18229
1	0.311991	0.218167
1	0.316967	0.221646
1	0.316199	0.221109
1	0.319182	0.223195
1	0.325931	0.227915
1	0.33278	0.232704
1	0.306694	0.214463
1	0.324873	0.227175
1	0.341762	0.238985
1	0.390428	0.273016
1	0.409101	0.286073
1	0.425989	0.297882
1	0.361989	0.253129
1	0.369786	0.258581
1	0.329196	0.230198
1	0.33914	0.237151
1	0.325157	0.227373
1	0.360313	0.251957
1	0.381878	0.267037
1	0.389189	0.272149
1	0.4106	0.287122
1	0.41339	0.289073
1	0.401791	0.280962
1	0.392873	0.274725
1	0.403783	0.282354
1	0.392711	0.274612
1	0.378222	0.26448
1	0.393694	0.2753
1	0.360466	0.252064
1	0.348513	0.243706
1	0.347862	0.24325
1	0.354831	0.248123
1	0.348008	0.243352
1	0.351084	0.245504
1	0.347729	0.243157
1	0.367977	0.257316
1	0.353943	0.247502
1	0.327867	0.229268
1	0.315017	0.220283
1	0.303331	0.212111
1	0.28259	0.197608
1	0.291526	0.203856
1	0.341838	0.239038
1	0.327165	0.228778
1	0.295716	0.206786
1	0.275588	0.192711
1	0.284578	0.198998
1	0.269437	0.18841
1	0.293659	0.205347
1	0.276367	0.193256
1	0.284732	0.199105
1	0.290199	0.202929
1	0.296879	0.207599
1	0.285603	0.199715
1	0.304536	0.212954
1	0.312862	0.218776
1	0.285201	0.199433
1	0.306448	0.214291
1	0.296264	0.207169
1	0.296914	0.207624
1	0.315635	0.220715
1	0.279342	0.195336
1	0.291165	0.203604
1	0.279237	0.195263
1	0.332737	0.232674
1	0.291885	0.204107
1	0.283567	0.198291
1	0.314471	0.219901
1	0.307483	0.215014
1	0.342345	0.239393
1	0.347688	0.243129
1	0.332104	0.232232
1	0.373615	0.261259
1	0.342155	0.23926
1	0.298729	0.208893
1	0.380609	0.266149
1	0.38231	0.267339
1	0.355978	0.248926
1	0.374805	0.262091
1	0.367981	0.257319
1	0.424794	0.297047
1	0.404434	0.282809
1	0.3906	0.273136
1	0.409188	0.286134
1	0.412712	0.288598
1	0.440645	0.308131
1	0.469556	0.328348
1	0.443752	0.310304
1	0.400675	0.280181
1	0.374359	0.261779
1	0.372563	0.260523
1	0.396325	0.277139
1	0.393869	0.275422
1	0.385558	0.26961
1	0.363971	0.254515
1	0.391521	0.27378
1	0.387512	0.270977
1	0.382366	0.267378
1	0.409655	0.28646
1	0.396363	0.277166
1	0.34423	0.240711
1	0.40467	0.282975
1	0.39166	0.273877
1	0.301969	0.211159
1	0.313827	0.219451
1	0.284757	0.199123
1	0.312598	0.218591
1	0.298972	0.209063
1	0.310395	0.217051
1	0.304587	0.212989
1	0.31078	0.21732
1	0.30463	0.21302
1	0.319631	0.223509
1	0.293955	0.205555
1	0.303711	0.212377
1	0.270836	0.189388
1	0.293227	0.205046
1	0.279786	0.195647
1	0.27784	0.194286
1	0.270377	0.189067
1	0.319823	0.223644
1	0.307221	0.214831
1	0.303443	0.212189
1	0.315	0.220271
1	0.315157	0.220381
1	0.335325	0.234484
1	0.307033	0.2147
1	0.304571	0.212978
1	0.316456	0.221289
1	0.318881	0.222985
1	0.294898	0.206214
1	0.329164	0.230175
1	0.313898	0.2195
1	0.335017	0.234268
1	0.337168	0.235773
1	0.349844	0.244636
1	0.363311	0.254053
1	0.324395	0.226841
1	0.315452	0.220587
1	0.358922	0.250984
1	0.333614	0.233287
1	0.320845	0.224358
1	0.303401	0.21216
1	0.248336	0.173654
1	0.319356	0.223317
1	0.289444	0.2024
1	0.324168	0.226682
1	0.333508	0.233213
1	0.326031	0.227984
1	0.331114	0.231539
1	0.36757	0.257032
1	0.370519	0.259094
1	0.331891	0.232083
1	0.393978	0.275498
1	0.3659	0.255864
1	0.360604	0.252161
1	0.344463	0.240873
1	0.362208	0.253282
1	0.344715	0.24105
1	0.352055	0.246182
1	0.384448	0.268834
1	0.367585	0.257042
1	0.372122	0.260215
1	0.376761	0.263459
1	0.360525	0.252105
1	0.364735	0.255049
1	0.352536	0.246519
1	0.348916	0.243987
1	0.322024	0.225182
1	0.353945	0.247504
1	0.32074	0.224285
1	0.337843	0.236244
1	0.303909	0.212515
1	0.303909	0.212515
1	0.283193	0.198029
1	0.279968	0.195774
1	0.258233	0.180575
1	0.261955	0.183178
1	0.266952	0.186672
1	0.262756	0.183738
1	0.253646	0.177368
1	0.260773	0.182352
1	0.276589	0.193411
1	0.274816	0.192171
1	0.262755	0.183738
1	0.3021	0.211251
1	0.306202	0.214118
1	0.313377	0.219136
1	0.266272	0.186197
1	0.291144	0.203589
1	0.277985	0.194388
1	0.269194	0.18824
1	0.268408	0.18769
1	0.248647	0.173872
1	0.240687	0.168306
1	0.255304	0.178527
1	0.257698	0.180201
1	0.26122	0.182664
1	0.242105	0.169298
1	0.241038	0.168551
1	0.265056	0.185347
1	0.266157	0.186116
1	0.288169	0.201509
1	0.307908	0.215312
1	0.310362	0.217028
1	0.309375	0.216338
1	0.312064	0.218218
1	0.313831	0.219454
1	0.313273	0.219063
1	0.296773	0.207525
1	0.318577	0.222772
1	0.321877	0.22508
1	0.328761	0.229894
1	0.344286	0.24075
1	0.325987	0.227954
1	0.316213	0.221119
1	0.304686	0.213058
1	0.334439	0.233864
1	0.33537	0.234515
1	0.326488	0.228304
1	0.339904	0.237686
1	0.331534	0.231832
1	0.328493	0.229707
1	0.332464	0.232483
1	0.335061	0.234299
1	0.313048	0.218906
1	0.304961	0.213251
1	0.321983	0.225154
1	0.326002	0.227964
1	0.325185	0.227393
1	0.329128	0.230151
1	0.320167	0.223884
1	0.318134	0.222463
1	0.311535	0.217848
1	0.301065	0.210527
1	0.313763	0.219406
1	0.309644	0.216526
1	0.286395	0.200268
1	0.312089	0.218235
1	0.314358	0.219822
1	0.288655	0.201849
1	0.282644	0.197645
1	0.268762	0.187938
1	0.26761	0.187132
1	0.276929	0.193649
1	0.280068	0.195844
1	0.291689	0.20397
1	0.278559	0.194788
1	0.253046	0.176948
1	0.281666	0.196961
1	0.268671	0.187875
1	0.284069	0.198642
1	0.302509	0.211536
1	0.302804	0.211743
1	0.311332	0.217706
1	0.294786	0.206136
1	0.292978	0.204872
1	0.306749	0.214501
1	0.309003	0.216077
1	0.3216	0.224886
1	0.27667	0.193468
1	0.282348	0.197438
1	0.281233	0.196659
1	0.295478	0.20662
1	0.298542	0.208762
1	0.304771	0.213118
1	0.314269	0.21976
1	0.302429	0.211481
1	0.29285	0.204782
1	0.315947	0.220933
1	0.31588	0.220886
1	0.270983	0.189491
1	0.277044	0.193729
1	0.261872	0.18312
1	0.250119	0.174901
1	0.246026	0.172039
1	0.244284	0.170821
1	0.252155	0.176325
1	0.250349	0.175062
1	0.252594	0.176632
1	0.254277	0.177809
1	0.293013	0.204896
1	0.308941	0.216034
1	0.311843	0.218063
1	0.299707	0.209577
1	0.349724	0.244553
1	0.330129	0.23085
1	0.323156	0.225974
1	0.289407	0.202375
1	0.262864	0.183813
1	0.255243	0.178484
1	0.258267	0.180599
1	0.256487	0.179354
1	0.296363	0.207239
1	0.311627	0.217913
1	0.305113	0.213357
1	0.31735	0.221914
1	0.308331	0.215607
1	0.269291	0.188308
1	0.30729	0.21488
1	0.286726	0.2005
1	0.293244	0.205058
1	0.306651	0.214432
1	0.297201	0.207824
1	0.287951	0.201356
1	0.312963	0.218846
1	0.343326	0.240078
1	0.32015	0.223872
1	0.333941	0.233516
1	0.337511	0.236012
1	0.332819	0.232731
1	0.296679	0.20746
1	0.338742	0.236873
1	0.340503	0.238105
1	0.330981	0.231446
1	0.363515	0.254196
1	0.357652	0.250096
1	0.343438	0.240157
1	0.333381	0.233124
1	0.330091	0.230823
1	0.298384	0.208652
1	0.323012	0.225873
1	0.320071	0.223817
1	0.331314	0.231679
1	0.316172	0.22109
1	0.309166	0.216191
1	0.284064	0.198638
1	0.291336	0.203724
1	0.36696	0.256605
1	0.371618	0.259863
1	0.339421	0.237348
1	0.376804	0.263489
1	0.370268	0.258918
1	0.389768	0.272554
1	0.336409	0.235242
1	0.310604	0.217197
1	0.31221	0.21832
1	0.298312	0.208601
1	0.305572	0.213678
1	0.342521	0.239516
1	0.346319	0.242172
1	0.330649	0.231214
1	0.317798	0.222228
1	0.335174	0.234378
1	0.322337	0.225402
1	0.333004	0.232861
1	0.32087	0.224376
1	0.315921	0.220915
1	0.291685	0.203967
1	0.299913	0.209721
1	0.296926	0.207632
1	0.301437	0.210787
1	0.2936	0.205306
1	0.309295	0.216282
1	0.331511	0.231816
1	0.306996	0.214674
1	0.295559	0.206677
1	0.293481	0.205224
1	0.293309	0.205103
1	0.297275	0.207876
1	0.293332	0.205119
1	0.284039	0.198621
1	0.30406	0.212621
1	0.291813	0.204057
1	0.284279	0.198789
1	0.284753	0.19912
1	0.308706	0.215869
1	0.316174	0.221092
1	0.306395	0.214253
1	0.342273	0.239342
1	0.316005	0.220973
1	0.306279	0.214173
1	0.315076	0.220324
1	0.347359	0.242899
1	0.279562	0.19549
1	0.308245	0.215547
1	0.299513	0.209441
1	0.314725	0.220079
1	0.286779	0.200537
1	0.289868	0.202697
1	0.282535	0.197569
1	0.297329	0.207914
1	0.288337	0.201626
1	0.287487	0.201032
1	0.291629	0.203928
1	0.362583	0.253545
1	0.366837	0.256519
1	0.329139	0.230158
1	0.352422	0.246439
1	0.407301	0.284815
1	0.345358	0.241499
1	0.301543	0.210861
1	0.293385	0.205156
1	0.31217	0.218292
1	0.297499	0.208033
1	0.279069	0.195145
1	0.30451	0.212936
1	0.301268	0.210669
1	0.289378	0.202354
1	0.274286	0.191801
1	0.260516	0.182172
1	0.291593	0.203903
1	0.273288	0.191103
1	0.289374	0.202351
1	0.274625	0.192038
1	0.282678	0.197669
1	0.260514	0.182171
1	0.268505	0.187758
1	0.262235	0.183374
1	0.251162	0.175631
1	0.255588	0.178725
1	0.252908	0.176852
1	0.245081	0.171379
1	0.297257	0.207864
1	0.295441	0.206594
1	0.296196	0.207122
1	0.305086	0.213338
1	0.296754	0.207512
1	0.310354	0.217022
1	0.296749	0.207509
1	0.310919	0.217417
1	0.303553	0.212266
1	0.329682	0.230537
1	0.301337	0.210717
1	0.31078	0.21732
1	0.303672	0.212349
1	0.317223	0.221825
1	0.31003	0.216795
1	0.28365	0.198349
1	0.299722	0.209587
1	0.283157	0.198004
1	0.267715	0.187206
1	0.245214	0.171472
1	0.281762	0.197028
1	0.287579	0.201096
1	0.295876	0.206898
1	0.289632	0.202532
1	0.301589	0.210893
1	0.278134	0.194491
1	0.299755	0.20961
1	0.289763	0.202624
1	0.329807	0.230625
1	0.346807	0.242513
1	0.291579	0.203893
1	0.315836	0.220856
1	0.305994	0.213974
1	0.312611	0.218601
1	0.302608	0.211605
1	0.339468	0.237381
1	0.35757	0.250039
1	0.342048	0.239185
1	0.344409	0.240836
1	0.340439	0.23806
1	0.343439	0.240158
1	0.367164	0.256748
1	0.36885	0.257927
1	0.342809	0.239717
1	0.36722	0.256787
1	0.326723	0.228468
1	0.290454	0.203107
1	0.308817	0.215947
1	0.306372	0.214238
1	0.27296	0.190873
1	0.27449	0.191943
1	0.26733	0.186936
1	0.289581	0.202496
1	0.316661	0.221433
1	0.325658	0.227724
1	0.340938	0.238409
1	0.315931	0.220922
1	0.31261	0.2186
1	0.29999	0.209774
1	0.307898	0.215304
1	0.28574	0.19981
1	0.293118	0.204969
1	0.307669	0.215145
1	0.276542	0.193378
1	0.300375	0.210044
1	0.304357	0.212828
1	0.307485	0.215016
1	0.317223	0.221826
1	0.315973	0.220952
1	0.296852	0.207581
1	0.289139	0.202187
1	0.320698	0.224256
1	0.297533	0.208057
1	0.316053	0.221007
1	0.34935	0.244291
1	0.369658	0.258491
1	0.349355	0.244295
1	0.338967	0.237031
1	0.346612	0.242376
1	0.315912	0.220909
1	0.259232	0.181274
1	0.282758	0.197725
1	0.335436	0.234561
1	0.329024	0.230078
1	0.311564	0.217868
1	0.334164	0.233672
1	0.318778	0.222913
1	0.327232	0.228824
1	0.331242	0.231629
1	0.321972	0.225147
1	0.319647	0.22352
1	0.302735	0.211694
1	0.302613	0.211609
1	0.29856	0.208775
1	0.314479	0.219906
1	0.354529	0.247912
1	0.319483	0.223406
1	0.30009	0.209844
1	0.302859	0.211781
1	0.302673	0.211651
1	0.305559	0.213669
1	0.315534	0.220644
1	0.302537	0.211556
1	0.302595	0.211597
1	0.345805	0.241812
1	0.315799	0.22083
1	0.328592	0.229776
1	0.342787	0.239702
1	0.347765	0.243182
1	0.364265	0.254721
1	0.361459	0.252759
1	0.338056	0.236394
1	0.381723	0.266929
1	0.386918	0.270561
1	0.379197	0.265162
1	0.379486	0.265364
1	0.378426	0.264623
1	0.41531	0.290415
1	0.388287	0.271519
1	0.393402	0.275095
1	0.392675	0.274587
1	0.387039	0.270646
1	0.406761	0.284437
1	0.372875	0.260741
1	0.421639	0.29484
1	0.374778	0.262072
1	0.356202	0.249082
1	0.363521	0.2542
1	0.374916	0.262168
1	0.315178	0.220396
1	0.303615	0.21231
1	0.361543	0.252817
1	0.388853	0.271914
1	0.398287	0.278511
1	0.373079	0.260884
1	0.398052	0.278347
1	0.457188	0.319699
1	0.462031	0.323086
1	0.446219	0.312029
1	0.454733	0.317983
1	0.472745	0.330578
1	0.45247	0.3164
1	0.457051	0.319604
1	0.453299	0.31698
1	0.437108	0.305657
1	0.468349	0.327504
1	0.384265	0.268706
1	0.385994	0.269915
1	0.414418	0.289791
1	0.433897	0.303412
1	0.44214	0.309176
1	0.51379	0.359279
1	0.531685	0.371793
1	0.478192	0.334387
1	0.422655	0.295551
1	0.386677	0.270392
1	0.382805	0.267685
1	0.386977	0.270603
1	0.418342	0.292535
1	0.406077	0.283959
1	0.403447	0.282119
1	0.362301	0.253347
1	0.294934	0.206239
1	0.364149	0.254639
1	0.370404	0.259014
1	0.366201	0.256074
1	0.439722	0.307486
1	0.423264	0.295977
1	0.462122	0.323149
1	0.452463	0.316395
1	0.469451	0.328274
1	0.451168	0.315489
1	0.433881	0.303401
1	0.48103	0.336371
1	0.492917	0.344683
1	0.505319	0.353356
1	0.559068	0.390941
1	0.546185	0.381932
1	0.544563	0.380798
1	0.494061	0.345484
1	0.482398	0.337328
1	0.547561	0.382895
1	0.510584	0.357038
1	0.493577	0.345145
1	0.500602	0.350057
1	0.480185	0.33578
1	0.47246	0.330379
1	0.500676	0.350109
1	0.478131	0.334344
1	0.445531	0.311547
1	0.482517	0.337411
1	0.430551	0.301073
1	0.429001	0.299988
1	0.467566	0.326956
1	0.436649	0.305337
1	0.540183	0.377735
1	0.554684	0.387876
1	0.536816	0.375381
1	0.521445	0.364632
1	0.491423	0.343639
1	0.479185	0.335081
1	0.424257	0.296672
1	0.447404	0.312857
1	0.438514	0.306641
1	0.411924	0.288047
1	0.363245	0.254007
1	0.351664	0.245909
1	0.373671	0.261298
1	0.378682	0.264802
1	0.35115	0.24555
1	0.380257	0.265904
1	0.366743	0.256454
1	0.348454	0.243664
1	0.352382	0.246411
1	0.347998	0.243345
1	0.331584	0.231868
1	0.349808	0.244611
1	0.335782	0.234803
1	0.345943	0.241909
1	0.330968	0.231437
1	0.342703	0.239643
1	0.26722	0.18686
1	0.26872	0.187909
1	0.271172	0.189624
1	0.272276	0.190395
1	0.238322	0.166652
1	0.262616	0.18364
1	0.318431	0.22267
1	0.284602	0.199015
1	0.287679	0.201166
1	0.295058	0.206326
1	0.295115	0.206366
1	0.249106	0.174193
1	0.259597	0.181529
1	0.265145	0.185409
1	0.271719	0.190005
1	0.261181	0.182636
1	0.253512	0.177274
1	0.281543	0.196876
1	0.250195	0.174955
1	0.248033	0.173443
1	0.253364	0.177171
1	0.248999	0.174118
1	0.259489	0.181453
1	0.255336	0.178549
1	0.263256	0.184087
1	0.279334	0.195331
1	0.289864	0.202694
1	0.340426	0.238051
1	0.331652	0.231915
1	0.333183	0.232986
1	0.305116	0.21336
1	0.306097	0.214045
1	0.325018	0.227276
1	0.321528	0.224835
1	0.309527	0.216444
1	0.298077	0.208437
1	0.310371	0.217034
1	0.293275	0.205079
1	0.295203	0.206427
1	0.317331	0.221901
1	0.326019	0.227976
1	0.325482	0.2276
1	0.322048	0.225199
1	0.326491	0.228306
1	0.33893	0.237005
1	0.265034	0.185331
1	0.296123	0.207071
1	0.2633	0.184118
1	0.28026	0.195978
1	0.300137	0.209877
1	0.31148	0.217809
1	0.310362	0.217027
1	0.297085	0.207744
1	0.320649	0.224221
1	0.307969	0.215354
1	0.315663	0.220735
1	0.348785	0.243896
1	0.354698	0.248031
1	0.33479	0.23411
1	0.35379	0.247396
1	0.359235	0.251203
1	0.360355	0.251987
1	0.390763	0.27325
1	0.403869	0.282414
1	0.406236	0.284069
1	0.439066	0.307027
1	0.375044	0.262258
1	0.356428	0.24924
1	0.346835	0.242532
1	0.352307	0.246359
1	0.342579	0.239556
1	0.353024	0.24686
1	0.389497	0.272364
1	0.371398	0.259709
1	0.370312	0.258949
1	0.387176	0.270741
1	0.395972	0.276893
1	0.41722	0.291751
1	0.396847	0.277505
1	0.392327	0.274344
1	0.338468	0.236681
1	0.391423	0.273711
1	0.390204	0.272859
1	0.37093	0.259381
1	0.396132	0.277005
1	0.30975	0.216599
1	0.313071	0.218922
1	0.285248	0.199466
1	0.275275	0.192492
1	0.313054	0.21891
1	0.298937	0.209038
1	0.318663	0.222832
1	0.333366	0.233114
1	0.313631	0.219313
1	0.285894	0.199918
1	0.282187	0.197326
1	0.341529	0.238822
1	0.319786	0.223618
1	0.280281	0.195993
1	0.270358	0.189054
1	0.290009	0.202795
1	0.276096	0.193066
1	0.287391	0.200965
1	0.267593	0.187121
1	0.282101	0.197265
1	0.291437	0.203794
1	0.332736	0.232673
1	0.271768	0.19004
1	0.290142	0.202888
1	0.283769	0.198432
1	0.292151	0.204293
1	0.289931	0.202741
1	0.324678	0.227038
1	0.312866	0.218779
1	0.291322	0.203714
1	0.297523	0.20805
1	0.306791	0.214531
1	0.26476	0.18514
1	0.28012	0.19588
1	0.303903	0.212511
1	0.302849	0.211774
1	0.301788	0.211032
1	0.304437	0.212885
1	0.312015	0.218183
1	0.304337	0.212814
1	0.318856	0.222967
1	0.331966	0.232135
1	0.334624	0.233993
1	0.330836	0.231344
1	0.350433	0.245048
1	0.317437	0.221975
1	0.320657	0.224227
1	0.297329	0.207914
1	0.283107	0.197969
1	0.276312	0.193217
1	0.319184	0.223197
1	0.325721	0.227768
1	0.378976	0.265008
1	0.39119	0.273549
1	0.385263	0.269404
1	0.389626	0.272455
1	0.378451	0.264641
1	0.380282	0.265921
1	0.375905	0.26286
1	0.308082	0.215433
1	0.306047	0.21401
1	0.322023	0.225182
1	0.341503	0.238804
1	0.387328	0.270848
1	0.394847	0.276106
1	0.391271	0.273605
1	0.322465	0.225491
1	0.345569	0.241647
1	0.358905	0.250973
1	0.358181	0.250466
1	0.330809	0.231325
1	0.364571	0.254934
1	0.344051	0.240586
1	0.354503	0.247894
1	0.376537	0.263302
1	0.429607	0.300413
1	0.44005	0.307715
1	0.42829	0.299492
1	0.389332	0.272249
1	0.34429	0.240753
1	0.304727	0.213087
1	0.264406	0.184892
1	0.286369	0.20025
1	0.284072	0.198643
1	0.28096	0.196468
1	0.288599	0.20181
1	0.294091	0.20565
1	0.297977	0.208367
1	0.27851	0.194754
1	0.316125	0.221058
1	0.308066	0.215422
1	0.317782	0.222216
1	0.308392	0.21565
1	0.327194	0.228798
1	0.302265	0.211366
1	0.318939	0.223025
1	0.307241	0.214845
1	0.301815	0.211051
1	0.283168	0.198012
1	0.276838	0.193585
1	0.296126	0.207073
1	0.348067	0.243393
1	0.328028	0.229381
1	0.400745	0.28023
1	0.39189	0.274038
1	0.419099	0.293064
1	0.390802	0.273277
1	0.395689	0.276694
1	0.403638	0.282253
1	0.397418	0.277904
1	0.39029	0.272919
1	0.420486	0.294035
1	0.424297	0.296699
1	0.371425	0.259727
1	0.407116	0.284685
1	0.374724	0.262034
1	0.358841	0.250928
1	0.357833	0.250223
1	0.368735	0.257846
1	0.282921	0.197839
1	0.303541	0.212258
1	0.297391	0.207957
1	0.345235	0.241413
1	0.359048	0.251072
1	0.352378	0.246408
1	0.291078	0.203543
1	0.274152	0.191707
1	0.269501	0.188455
1	0.303144	0.21198
1	0.302327	0.211409
1	0.360111	0.251816
1	0.358133	0.250433
1	0.360434	0.252041
1	0.369652	0.258488
1	0.369643	0.258481
1	0.368663	0.257796
1	0.383592	0.268235
1	0.311932	0.218125
1	0.29079	0.203341
1	0.309421	0.216369
1	0.294416	0.205877
1	0.309462	0.216398
1	0.306118	0.21406
1	0.282122	0.19728
1	0.370841	0.259319
1	0.323152	0.225971
1	0.400997	0.280407
1	0.391016	0.273427
1	0.403479	0.282142
1	0.410946	0.287363
1	0.456572	0.319268
1	0.450282	0.31487
1	0.449395	0.31425
1	0.421078	0.294448
1	0.405953	0.283872
1	0.399739	0.279526
1	0.396127	0.277001
1	0.400433	0.280012
1	0.43501	0.30419
1	0.38801	0.271325
1	0.387507	0.270973
1	0.407811	0.285171
1	0.440267	0.307867
1	0.423963	0.296466
1	0.397038	0.277638
1	0.411422	0.287696
1	0.336307	0.23517
1	0.304293	0.212784
1	0.33318	0.232983
1	0.332167	0.232275
1	0.36462	0.254969
1	0.34769	0.24313
1	0.307285	0.214876
1	0.328021	0.229376
1	0.314456	0.21989
1	0.318597	0.222786
1	0.335027	0.234276
1	0.311625	0.217911
1	0.299362	0.209335
1	0.298363	0.208637
1	0.297208	0.20783
1	0.303572	0.212279
1	0.293074	0.204939
1	0.30979	0.216628
1	0.296811	0.207551
1	0.284561	0.198986
1	0.293813	0.205456
1	0.244566	0.171018
1	0.259699	0.1816
1	0.266471	0.186336
1	0.267743	0.187225
1	0.287576	0.201094
1	0.338491	0.236698
1	0.299826	0.20966
1	0.294264	0.205771
1	0.318627	0.222807
1	0.318673	0.222839
1	0.307212	0.214825
1	0.319103	0.22314
1	0.291925	0.204135
1	0.290485	0.203128
1	0.30576	0.21381
1	0.302685	0.21166
1	0.295706	0.206779
1	0.279756	0.195626
1	0.272423	0.190498
1	0.260755	0.182339
1	0.251877	0.176131
1	0.289285	0.202289
1	0.248491	0.173763
1	0.247725	0.173227
1	0.239226	0.167284
1	0.233264	0.163115
1	0.235758	0.164859
1	0.225662	0.157799
1	0.293862	0.20549
1	0.287283	0.200889
1	0.298664	0.208847
1	0.300025	0.209799
1	0.311227	0.217632
1	0.267975	0.187388
1	0.352112	0.246222
1	0.317897	0.222297
1	0.363304	0.254049
1	0.353313	0.247062
1	0.329861	0.230663
1	0.293693	0.205372
1	0.305681	0.213754
1	0.275819	0.192873
1	0.265071	0.185357
1	0.257532	0.180085
1	0.254444	0.177926
1	0.259021	0.181127
1	0.27622	0.193153
1	0.282033	0.197218
1	0.275197	0.192438
1	0.254095	0.177682
1	0.318577	0.222772
1	0.251109	0.175594
1	0.270645	0.189255
1	0.249827	0.174697
1	0.24508	0.171378
1	0.276333	0.193232
1	0.286537	0.200368
1	0.310825	0.217351
1	0.315603	0.220693
1	0.343233	0.240013
1	0.327058	0.228703
1	0.306896	0.214604
1	0.308339	0.215613
1	0.256999	0.179712
1	0.261638	0.182957
1	0.297705	0.208177
1	0.268375	0.187667
1	0.256289	0.179216
1	0.25808	0.180468
1	0.262156	0.183319
1	0.254262	0.177799
1	0.257111	0.179791
1	0.301128	0.210571
1	0.311429	0.217774
1	0.296338	0.207221
1	0.300034	0.209806
1	0.29884	0.208971
1	0.301959	0.211152
1	0.298045	0.208415
1	0.307373	0.214937
1	0.298444	0.208694
1	0.300306	0.209996
1	0.258714	0.180912
1	0.277706	0.194192
1	0.289312	0.202308
1	0.287026	0.20071
1	0.293764	0.205421
1	0.29887	0.208991
1	0.30183	0.211061
1	0.284485	0.198932
1	0.294878	0.2062
1	0.300116	0.209863
1	0.276404	0.193282
1	0.29073	0.2033
1	0.271588	0.189914
1	0.265986	0.185997
1	0.256457	0.179333
1	0.266636	0.186451
1	0.280528	0.196166
1	0.27125	0.189678
1	0.274343	0.191841
1	0.282613	0.197624
1	0.285046	0.199325
1	0.27793	0.194349
1	0.306154	0.214085
1	0.310933	0.217427
1	0.292555	0.204576
1	0.317353	0.221916
1	0.30169	0.210963
1	0.32385	0.22646
1	0.299579	0.209488
1	0.315495	0.220617
1	0.319787	0.223618
1	0.351761	0.245977
1	0.344989	0.241241
1	0.320449	0.224081
1	0.324986	0.227254
1	0.303185	0.212009
1	0.30222	0.211334
1	0.331397	0.231737
1	0.369385	0.258301
1	0.310995	0.21747
1	0.305233	0.213441
1	0.347012	0.242656
1	0.336387	0.235227
1	0.367977	0.257316
1	0.309572	0.216475
1	0.29652	0.207348
1	0.275028	0.19232
1	0.275637	0.192745
1	0.269208	0.18825
1	0.273408	0.191187
1	0.301771	0.21102
1	0.254482	0.177952
1	0.271928	0.190152
1	0.281689	0.196978
1	0.296546	0.207366
1	0.293903	0.205518
1	0.294188	0.205718
1	0.304566	0.212975
1	0.271935	0.190157
1	0.263216	0.18406
1	0.261224	0.182667
1	0.264005	0.184611
1	0.2847	0.199083
1	0.278967	0.195074
1	0.289212	0.202238
1	0.316893	0.221595
1	0.318937	0.223024
1	0.306325	0.214204
1	0.282458	0.197515
1	0.278024	0.194415
1	0.261889	0.183132
1	0.267571	0.187105
1	0.2657	0.185796
1	0.227327	0.158964
1	0.226589	0.158447
1	0.225094	0.157402
1	0.223206	0.156082
1	0.226886	0.158655
1	0.238594	0.166843
1	0.227076	0.158788
1	0.221934	0.155193
1	0.228343	0.159674
1	0.289469	0.202418
1	0.317283	0.221867
1	0.299112	0.209161
1	0.325116	0.227345
1	0.322848	0.225759
1	0.314423	0.219867
1	0.316626	0.221408
1	0.310984	0.217463
1	0.309355	0.216323
1	0.260559	0.182202
1	0.257053	0.17975
1	0.271079	0.189558
1	0.260393	0.182086
1	0.257627	0.180152
1	0.270785	0.189352
1	0.27913	0.195188
1	0.265426	0.185605
1	0.282294	0.1974
1	0.278847	0.19499
1	0.276817	0.193571
1	0.2735	0.191251
1	0.270159	0.188915
1	0.270574	0.189205
1	0.288789	0.201942
1	0.274209	0.191747
1	0.231697	0.162019
1	0.221316	0.15476
1	0.234513	0.163989
1	0.273342	0.19114
1	0.280854	0.196393
1	0.26271	0.183706
1	0.279583	0.195505
1	0.261948	0.183173
1	0.269201	0.188245
1	0.255208	0.17846
1	0.256791	0.179567
1	0.254703	0.178107
1	0.258045	0.180444
1	0.337302	0.235866
1	0.361713	0.252936
1	0.323308	0.22608
1	0.286577	0.200395
1	0.286998	0.20069
1	0.247048	0.172754
1	0.264694	0.185093
1	0.242107	0.169299
1	0.232371	0.162491
1	0.234264	0.163815
1	0.252236	0.176382
1	0.234863	0.164234
1	0.301717	0.210983
1	0.294893	0.20621
1	0.300564	0.210176
1	0.307719	0.215179
1	0.307152	0.214783
1	0.318219	0.222522
1	0.316907	0.221605
1	0.322179	0.225291
1	0.299486	0.209423
1	0.319686	0.223547
1	0.308844	0.215966
1	0.311711	0.217971
1	0.308117	0.215457
1	0.301387	0.210752
1	0.292761	0.20472
1	0.313823	0.219448
1	0.288821	0.201965
1	0.281999	0.197195
1	0.294153	0.205693
1	0.286789	0.200544
1	0.283895	0.19852
1	0.276347	0.193242
1	0.303525	0.212247
1	0.316116	0.221051
1	0.310713	0.217273
1	0.310908	0.21741
1	0.310806	0.217338
1	0.315595	0.220687
1	0.325249	0.227437
1	0.306458	0.214298
1	0.293346	0.205129
1	0.292149	0.204292
1	0.280451	0.196112
1	0.296085	0.207044
1	0.283893	0.198518
1	0.290622	0.203224
1	0.325598	0.227681
1	0.308749	0.2159
1	0.295699	0.206774
1	0.301901	0.211111
1	0.296228	0.207144
1	0.310313	0.216994
1	0.315002	0.220272
1	0.309415	0.216366
1	0.305911	0.213915
1	0.318376	0.222632
1	0.307925	0.215324
1	0.326171	0.228082
1	0.262308	0.183425
1	0.273446	0.191213
1	0.255984	0.179003
1	0.25289	0.176839
1	0.273899	0.19153
1	0.276134	0.193093
1	0.261296	0.182717
1	0.277479	0.194034
1	0.268095	0.187471
1	0.295358	0.206536
1	0.280043	0.195826
1	0.259468	0.181439
1	0.237728	0.166237
1	0.254193	0.17775
1	0.246145	0.172122
1	0.276247	0.193172
1	0.261445	0.182821
1	0.267331	0.186937
1	0.27389	0.191524
1	0.268238	0.187572
1	0.276675	0.193471
1	0.309665	0.21654
1	0.291214	0.203638
1	0.286299	0.200201
1	0.293607	0.205312
1	0.314019	0.219585
1	0.318389	0.222641
1	0.321286	0.224666
1	0.328144	0.229462
1	0.355106	0.248316
1	0.401139	0.280506
1	0.427342	0.298829
1	0.391852	0.274011
1	0.345494	0.241595
1	0.327063	0.228706
1	0.324551	0.22695
1	0.320971	0.224446
1	0.312225	0.21833
1	0.301483	0.210818
1	0.297149	0.207788
1	0.332172	0.232279
1	0.309055	0.216114
1	0.279285	0.195296
1	0.253829	0.177495
1	0.266758	0.186536
1	0.268657	0.187864
1	0.313224	0.219029
1	0.272652	0.190658
1	0.31735	0.221914
1	0.313298	0.219081
1	0.291343	0.203728
1	0.294535	0.20596
1	0.306134	0.214071
1	0.313845	0.219463
1	0.328975	0.230044
1	0.338312	0.236572
1	0.337653	0.236112
1	0.308973	0.216056
1	0.335426	0.234554
1	0.345448	0.241563
1	0.347623	0.243084
1	0.359426	0.251337
1	0.396353	0.277159
1	0.424769	0.297029
1	0.405345	0.283446
1	0.426524	0.298256
1	0.422115	0.295174
1	0.422802	0.295654
1	0.420604	0.294117
1	0.389203	0.272159
1	0.407203	0.284746
1	0.402375	0.28137
1	0.405339	0.283443
1	0.411417	0.287692
1	0.414597	0.289917
1	0.46162	0.322798
1	0.44798	0.31326
1	0.471106	0.329431
1	0.414345	0.28974
1	0.419065	0.293041
1	0.398431	0.278612
1	0.404391	0.28278
1	0.383488	0.268163
1	0.394518	0.275876
1	0.441002	0.30838
1	0.454547	0.317853
1	0.457113	0.319647
1	0.481731	0.336861
1	0.511649	0.357782
1	0.535607	0.374536
1	0.498562	0.348631
1	0.507333	0.354764
1	0.513423	0.359023
1	0.506154	0.35394
1	0.517808	0.362089
1	0.547719	0.383005
1	0.456926	0.319516
1	0.427279	0.298784
1	0.401513	0.280767
1	0.449008	0.313979
1	0.436482	0.30522
1	0.449734	0.314487
1	0.425721	0.297695
1	0.408164	0.285418
1	0.414773	0.290039
1	0.397253	0.277788
1	0.386711	0.270416
1	0.405852	0.283801
1	0.398544	0.278691
1	0.435722	0.304689
1	0.432414	0.302375
1	0.394254	0.275691
1	0.380955	0.266391
1	0.414674	0.28997
1	0.415781	0.290744
1	0.407563	0.284997
1	0.403487	0.282147
1	0.401319	0.280631
1	0.356409	0.249227
1	0.385781	0.269766
1	0.377972	0.264305
1	0.38901	0.272024
1	0.395828	0.276792
1	0.384376	0.268784
1	0.376023	0.262943
1	0.378994	0.26502
1	0.325607	0.227688
1	0.349963	0.24472
1	0.326466	0.228289
1	0.33994	0.237711
1	0.276681	0.193476
1	0.303571	0.212279
1	0.268338	0.187641
1	0.265804	0.185869
1	0.297893	0.208309
1	0.291569	0.203886
1	0.296085	0.207044
1	0.287365	0.200947
1	0.345477	0.241583
1	0.337648	0.236108
1	0.355759	0.248772
1	0.346188	0.24208
1	0.334061	0.2336
1	0.31541	0.220558
1	0.335489	0.234598
1	0.30615	0.214082
1	0.314752	0.220098
1	0.310039	0.216802
1	0.329337	0.230297
1	0.327181	0.228789
1	0.315462	0.220594
1	0.330362	0.231013
1	0.301238	0.210647
1	0.298592	0.208797
1	0.307479	0.215012
1	0.307035	0.214701
1	0.295611	0.206713
1	0.318714	0.222868
1	0.311537	0.217849
1	0.316016	0.220981
1	0.310358	0.217025
1	0.303116	0.211961
1	0.310402	0.217056
1	0.300726	0.210289
1	0.312083	0.218231
1	0.309665	0.21654
1	0.305564	0.213673
1	0.298858	0.208983
1	0.287727	0.2012
1	0.295284	0.206484
1	0.295099	0.206355
1	0.330133	0.230853
1	0.29586	0.206887
1	0.311111	0.217552
1	0.303401	0.21216
1	0.320714	0.224267
1	0.297625	0.208121
1	0.320422	0.224063
1	0.31838	0.222634
1	0.311925	0.218121
1	0.321124	0.224553
1	0.325547	0.227646
1	0.36002	0.251752
1	0.298462	0.208706
1	0.297611	0.208111
1	0.313851	0.219468
1	0.310089	0.216837
1	0.299312	0.209301
1	0.332618	0.232591
1	0.366074	0.255985
1	0.34748	0.242983
1	0.353631	0.247284
1	0.344157	0.240659
1	0.388852	0.271913
1	0.397731	0.278122
1	0.445689	0.311658
1	0.422799	0.295652
1	0.47064	0.329106
1	0.417629	0.292037
1	0.397573	0.278012
1	0.388026	0.271336
1	0.375782	0.262774
1	0.379794	0.26558
1	0.433726	0.303293
1	0.440739	0.308197
1	0.435041	0.304212
1	0.460829	0.322245
1	0.392283	0.274313
1	0.387275	0.270811
1	0.402328	0.281337
1	0.390822	0.273291
1	0.347786	0.243197
1	0.31879	0.222921
1	0.315049	0.220305
1	0.334782	0.234104
1	0.337495	0.236001
1	0.346515	0.242309
1	0.362385	0.253406
1	0.358679	0.250815
1	0.336945	0.235616
1	0.35151	0.245802
1	0.346539	0.242325
1	0.335305	0.23447
1	0.410454	0.28702
1	0.404006	0.282511
1	0.4184	0.292576
1	0.396726	0.277419
1	0.375394	0.262503
1	0.360995	0.252434
1	0.322523	0.225531
1	0.347086	0.242708
1	0.374027	0.261547
1	0.299597	0.2095
1	0.290875	0.203401
1	0.275417	0.192592
1	0.327457	0.228982
1	0.354042	0.247572
1	0.424472	0.296822
1	0.366018	0.255946
1	0.327268	0.228849
1	0.329096	0.230128
1	0.30666	0.214439
1	0.345218	0.241401
1	0.300579	0.210186
1	0.336016	0.234967
1	0.345489	0.241591
1	0.371811	0.259997
1	0.407934	0.285257
1	0.332317	0.232381
1	0.346898	0.242576
1	0.327321	0.228887
1	0.365641	0.255683
1	0.378891	0.264948
1	0.370366	0.258987
1	0.423065	0.295838
1	0.404794	0.283061
1	0.392243	0.274285
1	0.397315	0.277832
1	0.370514	0.25909
1	0.397703	0.278103
1	0.433214	0.302935
1	0.426863	0.298494
1	0.445543	0.311556
1	0.376304	0.263139
1	0.316622	0.221405
1	0.343502	0.240201
1	0.294683	0.206063
1	0.348697	0.243834
1	0.338399	0.236633
1	0.333352	0.233104
1	0.339743	0.237573
1	0.351651	0.2459
1	0.331041	0.231488
1	0.302298	0.211389
1	0.310036	0.216799
1	0.327876	0.229275
1	0.317735	0.222184
1	0.279109	0.195173
1	0.301105	0.210554
1	0.301617	0.210913
1	0.316675	0.221442
1	0.322101	0.225237
1	0.31735	0.221914
1	0.306882	0.214594
1	0.305585	0.213687
1	0.317414	0.221959
1	0.302774	0.211722
1	0.307531	0.215048
1	0.309021	0.21609
1	0.299973	0.209763
1	0.312317	0.218395
1	0.317604	0.222092
1	0.306429	0.214278
1	0.308705	0.215869
1	0.310389	0.217047
1	0.338483	0.236692
1	0.310705	0.217268
1	0.331026	0.231478
1	0.31301	0.218879
1	0.29896	0.209055
1	0.313701	0.219363
1	0.335051	0.234292
1	0.333374	0.23312
1	0.360088	0.2518
1	0.351439	0.245751
1	0.302147	0.211283
1	0.321684	0.224945
1	0.315409	0.220557
1	0.323127	0.225954
1	0.307594	0.215092
1	0.289964	0.202764
1	0.309642	0.216524
1	0.308859	0.215977
1	0.338405	0.236638
1	0.335448	0.23457
1	0.318517	0.22273
1	0.327026	0.22868
1	0.350533	0.245118
1	0.350737	0.245261
1	0.333182	0.232985
1	0.312161	0.218286
1	0.345551	0.241635
1	0.338134	0.236448
1	0.327279	0.228857
1	0.379133	0.265117
1	0.361402	0.252719
1	0.372189	0.260261
1	0.368752	0.257858
1	0.389479	0.272352
1	0.37877	0.264863
1	0.385249	0.269394
1	0.355294	0.248448
1	0.323863	0.226469
1	0.303674	0.212351
1	0.312238	0.21834
1	0.318711	0.222866
1	0.293051	0.204922
1	0.275088	0.192362
1	0.283537	0.19827
1	0.28044	0.196104
1	0.273352	0.191148
1	0.264773	0.185149
1	0.275434	0.192603
1	0.315611	0.220698
1	0.315194	0.220407
1	0.322991	0.225859
1	0.301783	0.211028
1	0.3147	0.220061
1	0.322458	0.225486
1	0.292528	0.204557
1	0.277405	0.193982
1	0.274065	0.191646
1	0.268307	0.18762
1	0.281954	0.197163
1	0.288425	0.201688
1	0.283251	0.19807
1	0.295939	0.206942
1	0.311786	0.218023
1	0.316323	0.221196
1	0.32333	0.226096
1	0.319513	0.223427
1	0.251374	0.175779
1	0.252827	0.176795
1	0.250906	0.175452
1	0.249075	0.174171
1	0.250497	0.175165
1	0.246033	0.172044
1	0.252173	0.176338
1	0.252767	0.176753
1	0.233381	0.163197
1	0.250287	0.175019
1	0.236071	0.165078
1	0.241453	0.168842
1	0.25108	0.175574
1	0.250907	0.175452
1	0.293556	0.205276
1	0.260859	0.182412
1	0.273778	0.191446
1	0.30186	0.211082
1	0.2846	0.199013
1	0.346124	0.242035
1	0.319507	0.223423
1	0.325321	0.227488
1	0.345073	0.2413
1	0.348985	0.244036
1	0.349091	0.24411
1	0.350026	0.244763
1	0.345668	0.241716
1	0.332824	0.232735
1	0.345906	0.241883
1	0.342801	0.239712
1	0.350899	0.245374
1	0.350535	0.245119
1	0.39894	0.278968
1	0.388964	0.271992
1	0.360031	0.25176
1	0.328874	0.229972
1	0.338974	0.237035
1	0.338336	0.236589
1	0.328168	0.229479
1	0.339015	0.237064
1	0.322875	0.225778
1	0.287129	0.200781
1	0.274239	0.191768
1	0.286316	0.200213
1	0.276533	0.193372
1	0.302822	0.211755
1	0.308396	0.215653
1	0.293142	0.204986
1	0.36791	0.257269
1	0.339092	0.237118
1	0.377186	0.263756
1	0.363717	0.254337
1	0.373189	0.260961
1	0.356332	0.249173
1	0.341623	0.238888
1	0.344079	0.240605
1	0.378979	0.26501
1	0.39522	0.276367
1	0.402338	0.281344
1	0.392193	0.27425
1	0.372144	0.26023
1	0.348994	0.244042
1	0.310968	0.217451
1	0.31872	0.222872
1	0.321705	0.22496
1	0.324758	0.227095
1	0.305955	0.213946
1	0.318689	0.22285
1	0.30651	0.214334
1	0.316207	0.221115
1	0.299065	0.209128
1	0.311606	0.217898
1	0.370851	0.259326
1	0.397925	0.278258
1	0.450144	0.314773
1	0.382445	0.267433
1	0.37658	0.263332
1	0.340176	0.237876
1	0.355285	0.248441
1	0.337977	0.236338
1	0.330891	0.231383
1	0.360135	0.251833
1	0.325149	0.227368
1	0.315658	0.220731
1	0.317985	0.222358
1	0.320483	0.224105
1	0.301233	0.210644
1	0.30393	0.21253
1	0.312703	0.218665
1	0.332208	0.232304
1	0.350327	0.244974
1	0.406494	0.28425
1	0.448927	0.313923
1	0.406078	0.283959
1	0.327036	0.228688
1	0.391819	0.273988
1	0.39733	0.277842
1	0.381266	0.266609
1	0.415167	0.290315
1	0.371192	0.259564
1	0.372966	0.260805
1	0.337937	0.23631
1	0.372923	0.260775
1	0.366753	0.25646
1	0.381707	0.266917
1	0.336444	0.235266
1	0.343411	0.240138
1	0.371369	0.259688
1	0.433797	0.303343
1	0.438188	0.306413
1	0.43968	0.307456
1	0.437452	0.305898
1	0.37844	0.264633
1	0.383843	0.268411
1	0.355271	0.248431
1	0.344976	0.241233
1	0.347371	0.242907
1	0.375081	0.262284
1	0.335509	0.234612
1	0.329898	0.230689
1	0.318671	0.222838
1	0.333084	0.232917
1	0.33478	0.234102
1	0.339034	0.237077
1	0.374897	0.262155
1	0.385564	0.269614
1	0.363128	0.253926
1	0.391089	0.273478
1	0.36424	0.254703
1	0.402347	0.28135
1	0.453131	0.316862
1	0.4744	0.331735
1	0.43956	0.307372
1	0.43179	0.301939
1	0.44702	0.312589
1	0.404807	0.283071
1	0.433947	0.303447
1	0.411991	0.288094
1	0.413097	0.288868
1	0.423661	0.296255
1	0.481756	0.336879
1	0.456745	0.319389
1	0.42224	0.295261
1	0.401649	0.280862
1	0.406461	0.284227
1	0.467395	0.326837
1	0.440624	0.308117
1	0.447133	0.312668
1	0.472894	0.330682
1	0.485593	0.339562
1	0.494443	0.34575
1	0.491093	0.343408
1	0.460523	0.322031
1	0.447977	0.313258
1	0.452251	0.316247
1	0.458024	0.320284
1	0.447151	0.312681
1	0.449514	0.314333
1	0.446587	0.312286
1	0.434215	0.303635
1	0.39255	0.274499
1	0.445539	0.311553
1	0.493392	0.345016
1	0.460097	0.321733
1	0.474548	0.331838
1	0.485529	0.339517
1	0.500644	0.350087
1	0.530911	0.371252
1	0.530915	0.371254
1	0.574968	0.402059
1	0.661568	0.462616
1	0.663859	0.464219
1	0.63641	0.445024
1	0.592553	0.414356
1	0.610817	0.427127
1	0.567883	0.397105
1	0.552301	0.386209
1	0.582001	0.406978
1	0.598064	0.41821
1	0.61084	0.427144
1	0.573943	0.401343
1	0.569175	0.398009
1	0.551251	0.385474
1	0.511003	0.35733
1	0.545387	0.381374
1	0.555914	0.388735
1	0.547393	0.382777
1	0.551589	0.385711
1	0.522699	0.365509
1	0.486973	0.340527
1	0.439214	0.307131
1	0.388015	0.271328
1	0.4314	0.301666
1	0.410853	0.287298
1	0.400405	0.279992
1	0.433435	0.303089
1	0.433174	0.302906
1	0.43776	0.306114
1	0.432727	0.302594
1	0.401932	0.28106
1	0.386668	0.270386
1	0.411695	0.287887
1	0.39673	0.277422
1	0.402086	0.281168
1	0.363011	0.253843
1	0.350035	0.24477
1	0.328255	0.22954
1	0.318509	0.222724
1	0.326711	0.22846
1	0.232727	0.16274
1	0.251584	0.175926
1	0.253794	0.177471
1	0.271446	0.189815
1	0.258423	0.180708
1	0.28086	0.196397
1	0.262751	0.183734
1	0.295394	0.206561
1	0.304947	0.213241
1	0.30925	0.21625
1	0.303202	0.212021
1	0.351738	0.245961
1	0.33741	0.235942
1	0.304262	0.212762
1	0.352021	0.246159
1	0.32789	0.229285
1	0.32357	0.226264
1	0.328499	0.22971
1	0.320693	0.224252
1	0.374162	0.261642
1	0.353404	0.247126
1	0.362591	0.25355
1	0.353589	0.247255
1	0.350965	0.24542
1	0.354331	0.247774
1	0.32873	0.229872
1	0.343683	0.240328
1	0.335495	0.234603
1	0.340443	0.238062
1	0.34182	0.239026
1	0.29153	0.203859
1	0.287394	0.200967
1	0.3223	0.225375
1	0.313987	0.219563
1	0.297535	0.208058
1	0.32934	0.230299
1	0.310373	0.217036
1	0.311558	0.217864
1	0.319898	0.223696
1	0.320379	0.224032
1	0.324249	0.226738
1	0.306857	0.214577
1	0.302777	0.211724
1	0.292956	0.204856
1	0.298051	0.208419
1	0.295061	0.206328
1	0.320038	0.223794
1	0.350015	0.244756
1	0.319694	0.223553
1	0.299337	0.209318
1	0.30296	0.211852
1	0.320026	0.223786
1	0.330134	0.230854
1	0.285236	0.199458
1	0.310076	0.216828
1	0.341588	0.238863
1	0.324207	0.226709
1	0.306431	0.214279
1	0.334167	0.233674
1	0.328539	0.229738
1	0.351457	0.245764
1	0.354638	0.247988
1	0.341024	0.238468
1	0.347095	0.242714
1	0.342653	0.239608
1	0.333067	0.232905
1	0.338071	0.236404
1	0.385586	0.26963
1	0.386221	0.270074
1	0.368795	0.257888
1	0.35009	0.244808
1	0.412929	0.28875
1	0.359721	0.251543
1	0.369252	0.258208
1	0.41088	0.287317
1	0.416888	0.291518
1	0.397266	0.277797
1	0.375679	0.262702
1	0.375069	0.262276
1	0.359363	0.251293
1	0.328442	0.22967
1	0.335633	0.234699
1	0.332447	0.232471
1	0.333242	0.233027
1	0.321895	0.225093
1	0.321619	0.2249
1	0.280143	0.195896
1	0.290139	0.202887
1	0.293513	0.205246
1	0.306953	0.214644
1	0.295185	0.206415
1	0.402106	0.281182
1	0.452212	0.31622
1	0.395655	0.276671
1	0.42995	0.300652
1	0.427209	0.298736
1	0.452699	0.31656
1	0.416702	0.291388
1	0.444586	0.310887
1	0.439126	0.307069
1	0.406833	0.284487
1	0.372427	0.260428
1	0.340106	0.237827
1	0.3158	0.22083
1	0.301325	0.210709
1	0.297466	0.20801
1	0.317852	0.222265
1	0.309214	0.216225
1	0.325652	0.22772
1	0.337493	0.236
1	0.342272	0.239341
1	0.333879	0.233473
1	0.323812	0.226433
1	0.343784	0.240399
1	0.323466	0.226191
1	0.328496	0.229708
1	0.334287	0.233758
1	0.351224	0.245601
1	0.379786	0.265574
1	0.31508	0.220327
1	0.327839	0.229249
1	0.377184	0.263755
1	0.382659	0.267583
1	0.372422	0.260424
1	0.297652	0.20814
1	0.337517	0.236016
1	0.333968	0.233534
1	0.338118	0.236437
1	0.379414	0.265314
1	0.368338	0.257569
1	0.388778	0.271862
1	0.345301	0.24146
1	0.369681	0.258508
1	0.387356	0.270868
1	0.373912	0.261466
1	0.371214	0.25958
1	0.368326	0.257561
1	0.345603	0.241671
1	0.376395	0.263203
1	0.326911	0.2286
1	0.355922	0.248887
1	0.410662	0.287165
1	0.374299	0.261737
1	0.419588	0.293407
1	0.359433	0.251342
1	0.361682	0.252914
1	0.336648	0.235409
1	0.329537	0.230436
1	0.306078	0.214032
1	0.298304	0.208596
1	0.286163	0.200106
1	0.296496	0.207331
1	0.3076	0.215096
1	0.30443	0.21288
1	0.311717	0.217975
1	0.30977	0.216614
1	0.327451	0.228977
1	0.328932	0.230013
1	0.325888	0.227885
1	0.325427	0.227563
1	0.364782	0.255082
1	0.335249	0.234431
1	0.321017	0.224478
1	0.381701	0.266913
1	0.33907	0.237102
1	0.373116	0.26091
1	0.340366	0.238009
1	0.320423	0.224063
1	0.316235	0.221134
1	0.301013	0.21049
1	0.292404	0.20447
1	0.285748	0.199816
1	0.29699	0.207677
1	0.297255	0.207862
1	0.295736	0.2068
1	0.287125	0.200778
1	0.293458	0.205207
1	0.321191	0.2246
1	0.315136	0.220366
1	0.319134	0.223162
1	0.318239	0.222536
1	0.307764	0.215211
1	0.309899	0.216704
1	0.306149	0.214081
1	0.331141	0.231558
1	0.327272	0.228852
1	0.313396	0.219149
1	0.323488	0.226206
1	0.337077	0.235709
1	0.321626	0.224904
1	0.329957	0.23073
1	0.308292	0.21558
1	0.306358	0.214228
1	0.313491	0.219215
1	0.304357	0.212829
1	0.323917	0.226507
1	0.31142	0.217768
1	0.320903	0.224399
1	0.334727	0.234066
1	0.336299	0.235165
1	0.362951	0.253802
1	0.32693	0.228613
1	0.289933	0.202742
1	0.362086	0.253197
1	0.37381	0.261395
1	0.389951	0.272682
1	0.37932	0.265248
1	0.375585	0.262636
1	0.373851	0.261424
1	0.303924	0.212526
1	0.329655	0.230519
1	0.311377	0.217737
1	0.309877	0.216688
1	0.296168	0.207102
1	0.302128	0.21127
1	0.314833	0.220154
1	0.349122	0.244132
1	0.35822	0.250493
1	0.347988	0.243339
[truncated: 3,803 more rows]
