# Supplementary material for: Stochastic bond dynamics facilitates alignment of malaria parasite at erythrocyte membrane upon invasion
Source: eLife journal article supplement (doi:10.7554/elife.56500), 2020-05-18
Supplement: fig5-data1 [file sigma_displacement.xlsx]

## Sheet: Sheet1
sigma	displacement
0.15	0.0713587
0.15	0.0400217
0.15	0.0458587
0.15	0.0848913
0.15	0.0470652
0.15	0.0359022
0.15	0.0520978
0.15	0.0700652
0.15	0.0458261
0.15	0.0260326
0.15	0.023837
0.15	0.0539891
0.15	0.0150109
0.15	0.125554
0.15	0.0284022
0.15	0.0779565
0.15	0.174946
0.15	0.0697065
0.15	0.0519783
0.15	0.106087
0.15	0.0651522
0.15	0.0295978
0.15	0.0741304
0.15	0.0608696
0.15	0.0572935
0.15	0.0922174
0.15	0.101315
0.15	0.0636522
0.15	0.0393261
0.15	0.0262174
0.15	0.0363261
0.15	0.0603913
0.15	0.0468478
0.15	0.066
0.15	0.123293
0.15	0.0665435
0.15	0.146326
0.15	0.0363152
0.15	0.0447065
0.15	0.0804565
0.15	0.0434239
0.15	0.0776087
0.15	0.0530543
0.15	0.0492826
0.15	0.0419565
0.15	0.116011
0.15	0.0941413
0.15	0.0469891
0.15	0.14325
0.15	0.0240978
0.15	0.131261
0.15	0.0302065
0.15	0.0363261
0.15	0.14075
0.15	0.1115
0.15	0.0675761
0.15	0.0547717
0.15	0.0551848
0.15	0.102207
0.15	0.157
0.15	0.105739
0.15	0.035413
0.15	0.0283913
0.15	0.0237283
0.15	0.0604239
0.15	0.0448261
0.15	0.039913
0.15	0.0392717
0.15	0.0309674
0.15	0.0372609
0.15	0.0215652
0.15	0.0137065
0.15	0.142315
0.15	0.127946
0.15	0.0664457
0.15	0.0540435
0.15	0.0503478
0.15	0.0606087
0.15	0.0648587
0.15	0.111891
0.15	0.052
0.15	0.0981304
0.15	0.0127174
0.15	0.0578913
0.15	0.157272
0.15	0.0570761
0.15	0.0388478
0.15	0.0319348
0.15	0.0343478
0.15	0.0541304
0.15	0.0396304
0.15	0.0227609
0.15	0.0507065
0.15	0.0227717
0.2	0.143913
0.2	0.022337
0.2	0.0886413
0.2	0.0851848
0.2	0.0990109
0.2	0.0165543
0.2	0.0967826
0.2	0.0593587
0.2	0.0585109
0.2	0.0547826
0.2	0.0585435
0.2	0.0530217
0.2	0.0922283
0.2	0.160141
0.2	0.148957
0.2	0.043663
0.2	0.0364674
0.2	0.0565652
0.2	0.110913
0.2	0.0135543
0.2	0.0669783
0.2	0.0227174
0.2	0.0511196
0.2	0.0297065
0.2	0.0864891
0.2	0.0618696
0.2	0.0458478
0.2	0.05625
0.2	0.0432391
0.2	0.0175435
0.2	0.0308696
0.2	0.063913
0.2	0.067663
0.2	0.0790109
0.2	0.0173478
0.2	0.0188696
0.2	0.0394891
0.2	0.0587935
0.2	0.0286957
0.2	0.0487174
0.2	0.0391304
0.2	0.00979348
0.2	0.0260435
0.2	0.0199022
0.2	0.0789565
0.2	0.0264674
0.2	0.0459783
0.2	0.157935
0.2	0.127957
0.2	0.0475978
0.2	0.0283913
0.2	0.10013
0.2	0.0465761
0.2	0.0382174
0.2	0.03975
0.2	0.144946
0.2	0.0373261
0.2	0.0783696
0.2	0.0597391
0.2	0.0894674
0.2	0.0487935
0.2	0.0140652
0.2	0.0330978
0.2	0.0183043
0.2	0.00833696
0.2	0.0634457
0.2	0.0170109
0.2	0.0505
0.2	0.0178696
0.2	0.0148587
0.2	0.0700435
0.2	0.0680652
0.2	0.0626848
0.2	0.0642391
0.2	0.0436848
0.2	0.0524783
0.2	0.0431413
0.2	0.068837
0.2	0.081913
0.2	0.0413478
0.2	0.122065
0.2	0.0705652
0.2	0.0736196
0.2	0.0310217
0.2	0.117076
0.2	0.0243696
0.2	0.0462065
0.2	0.059413
0.2	0.0620217
0.2	0.031337
0.2	0.147935
0.2	0.145674
0.2	0.0401196
0.2	0.0571413
0.2	0.073913
0.2	0.0550435
0.2	0.0344348
0.2	0.0950978
0.2	0.110304
0.2	0.123946
0.2	0.072837
0.2	0.0546413
0.2	0.093413
0.2	0.0843478
0.2	0.0198261
0.2	0.0453587
0.2	0.0257717
0.2	0.0919348
0.2	0.0412065
0.2	0.0505543
0.2	0.0424565
0.2	0.0359674
0.2	0.00743478
0.2	0.0121087
0.2	0.168652
0.2	0.0340543
0.2	0.0425652
0.2	0.113761
0.2	0.0570761
0.2	0.0976739
0.2	0.0442065
0.2	0.088
0.2	0.0296522
0.2	0.159533
0.2	0.0636739
0.2	0.0812935
0.2	0.0574783
0.2	0.072413
0.2	0.0567065
0.2	0.0530109
0.2	0.0848696
0.2	0.0670435
0.2	0.0766087
0.2	0.0357174
0.2	0.0929891
0.2	0.0520978
0.2	0.0398804
0.2	0.0463043
0.2	0.0798043
0.2	0.0218696
0.2	0.0366196
0.2	0.0590109
0.2	0.0553913
0.2	0.0328587
0.2	0.0078913
0.2	0.0327391
0.2	0.0435652
0.2	0.0380435
0.2	0.129533
0.2	0.0768587
0.2	0.0849348
0.2	0.03375
0.2	0.0367174
0.2	0.0618043
0.2	0.068587
0.2	0.0578804
0.2	0.0147717
0.2	0.0485435
0.2	0.0813804
0.2	0.0598587
0.2	0.172293
0.2	0.141913
0.2	0.107598
0.2	0.0304674
0.2	0.0511739
0.2	0.0599239
0.2	0.106457
0.2	0.058337
0.2	0.018837
0.2	0.0312717
0.2	0.0365217
0.2	0.0199674
0.2	0.0245652
0.2	0.0115435
0.2	0.014413
0.2	0.031
0.2	0.013837
0.2	0.034087
0.2	0.04825
0.2	0.0517391
0.2	0.0519457
0.2	0.0693478
0.2	0.0361522
0.2	0.0609783
0.2	0.0279891
0.2	0.0657609
0.2	0.0491087
0.2	0.0813152
0.2	0.106457
0.2	0.0497283
0.2	0.0330109
0.2	0.0744457
0.2	0.0477391
0.2	0.0369457
0.2	0.0328043
0.2	0.0408478
0.2	0.0697609
0.2	0.0523478
0.2	0.0329674
0.2	0.0651739
0.2	0.0214783
0.2	0.0365761
0.2	0.045587
0.2	0.0867609
0.2	0.102902
0.2	0.0959783
0.2	0.0444348
0.2	0.0494022
0.2	0.0658913
0.2	0.137989
0.2	0.00415217
0.2	0.0116848
0.2	0.0450435
0.2	0.0492065
0.2	0.0187065
0.2	0.019837
0.2	0.0747717
0.2	0.0260652
0.2	0.0562065
0.2	0.039163
0.2	0.0251848
0.2	0.033913
0.2	0.0165217
0.2	0.0814891
0.2	0.01625
0.2	0.104011
0.2	0.120326
0.2	0.0471848
0.2	0.124359
0.2	0.0379457
0.2	0.0997935
0.2	0.0633587
0.2	0.0730435
0.2	0.0270326
0.2	0.0494891
0.2	0.0832717
0.2	0.0138913
0.2	0.0929783
0.2	0.0280109
0.2	0.0132609
0.2	0.06825
0.2	0.048087
0.2	0.0436087
0.2	0.0243043
0.2	0.0241848
0.2	0.0567174
0.2	0.0700761
0.2	0.0173152
0.2	0.0285435
0.2	0.124467
0.2	0.134478
0.2	0.0584348
0.2	0.061163
0.2	0.106859
0.2	0.0384239
0.2	0.105457
0.2	0.0348478
0.2	0.0572935
0.2	0.0348804
0.2	0.0659891
0.2	0.0476413
0.2	0.0636957
0.2	0.120902
0.2	0.04025
0.2	0.0110543
0.2	0.0288913
0.2	0.00555435
0.2	0.0126957
0.2	0.0356957
0.2	0.0141739
0.2	0.0927065
0.2	0.122663
0.2	0.0582826
0.2	0.0723696
0.2	0.130272
0.2	0.118511
0.2	0.12112
0.2	0.0471739
0.2	0.0389239
0.2	0.057587
0.2	0.0349565
0.2	0.0420109
0.2	0.0308478
0.2	0.0294239
0.2	0.0533913
0.2	0.0561522
0.2	0.0457065
0.2	0.0702174
0.2	0.0618913
0.2	0.0525543
0.2	0.0416413
0.2	0.0369239
0.2	0.028587
0.2	0.0229891
0.2	0.0144783
0.2	0.0267065
0.2	0.161272
0.2	0.11325
0.2	0.158783
0.2	0.129728
0.2	0.0380761
0.2	0.0384783
0.2	0.0125217
0.2	0.0335
0.2	0.0348478
0.2	0.0417174
0.2	0.127217
0.2	0.040587
0.2	0.0101087
0.2	0.0361739
0.2	0.044087
0.2	0.0309891
0.2	0.0647609
0.2	0.0418261
0.2	0.0559239
0.2	0.0563261
0.2	0.0316304
0.2	0.06175
0.2	0.0187935
0.2	0.0942391
0.2	0.10387
0.2	0.0545543
0.2	0.0241087
0.2	0.120859
0.2	0.108359
0.2	0.0443913
0.2	0.0538804
0.2	0.0389674
0.2	0.0794022
0.2	0.0640761
0.2	0.0982717
0.2	0.0798261
0.2	0.0323261
0.2	0.0503913
0.2	0.0139565
0.2	0.0140761
0.2	0.0227391
0.2	0.0638261
0.2	0.0838261
0.2	0.0681413
0.2	0.0116739
0.2	0.129457
0.2	0.0595109
0.2	0.122152
0.2	0.0685217
0.2	0.0627609
0.2	0.0575326
0.2	0.131837
0.2	0.0466848
0.2	0.0373587
0.2	0.100674
0.2	0.0223261
0.2	0.00954348
0.2	0.0779565
0.2	0.0188804
0.2	0.0252609
0.2	0.00903261
0.2	0.0408913
0.2	0.0317065
0.2	0.0336196
0.2	0.0280435
0.2	0.0210978
0.2	0.045663
0.2	0.081837
0.2	0.166076
0.2	0.0843152
0.2	0.0941522
0.2	0.00722826
0.2	0.0848696
0.2	0.0573804
0.2	0.0211957
0.2	0.0438152
0.2	0.0652826
0.2	0.0300217
0.2	0.0358043
0.2	0.02325
0.2	0.0400435
0.2	0.0128913
0.2	0.044337
0.2	0.0810435
0.2	0.0539457
0.2	0.0400978
0.2	0.045913
0.2	0.00753261
0.2	0.0375652
0.2	0.0725
0.2	0.0393043
0.2	0.0275435
0.2	0.0468043
0.2	0.0393696
0.2	0.138087
0.2	0.1345
0.2	0.0472391
0.2	0.0239348
0.2	0.0226957
0.2	0.100674
0.2	0.117141
0.2	0.0576413
0.2	0.0556087
0.2	0.0274565
0.2	0.0211739
0.2	0.0334239
0.2	0.0139783
0.2	0.0217065
0.2	0.0356739
0.2	0.0269783
0.2	0.0477717
0.2	0.0697391
0.2	0.0943804
0.2	0.11187
0.2	0.0929891
0.2	0.0592935
0.2	0.13712
0.2	0.0244022
0.2	0.0618696
0.2	0.0389565
0.2	0.0199457
0.2	0.043337
0.2	0.0425652
0.2	0.0385978
0.2	0.0650435
0.2	0.0869891
0.2	0.10337
0.2	0.0131304
0.2	0.0297391
0.2	0.0343587
0.2	0.0349457
0.2	0.0309022
0.2	0.00613043
0.2	0.0185543
0.2	0.0523696
0.2	0.16238
0.2	0.166098
0.2	0.0941957
0.2	0.0543261
0.2	0.103685
0.2	0.0944457
0.2	0.102413
0.2	0.0789022
0.2	0.0711087
0.2	0.0984348
0.2	0.0251413
0.2	0.0437174
0.2	0.0437826
0.2	0.0811413
0.2	0.068837
0.2	0.0184891
0.2	0.0276413
0.2	0.110913
0.2	0.0376196
0.2	0.067587
0.2	0.0341304
0.2	0.0875326
0.2	0.0160652
0.2	0.063087
0.2	0.0332717
0.2	0.13337
0.2	0.103315
0.2	0.153609
0.2	0.0544891
0.2	0.0879674
0.2	0.0743043
0.2	0.0990978
0.2	0.0279239
0.2	0.0306522
0.2	0.05425
0.2	0.0755652
0.2	0.0964022
0.2	0.0728261
0.2	0.0723478
0.2	0.0500326
0.2	0.0365652
0.2	0.0214783
0.2	0.018663
0.2	0.0321522
0.2	0.0441848
0.2	0.0531957
0.2	0.0173043
0.2	0.0508152
0.2	0.16188
0.2	0.125391
0.2	0.0959457
0.2	0.12675
0.2	0.116522
0.2	0.054337
0.2	0.074163
0.2	0.0423587
0.2	0.0290326
0.2	0.0247935
0.2	0.076587
0.2	0.0309239
0.2	0.0310217
0.2	0.0464022
0.2	0.0103913
0.2	0.014
0.2	0.0285326
0.2	0.00655435
0.2	0.0511848
0.2	0.0419783
0.2	0.104522
0.2	0.0218261
0.2	0.0689565
0.2	0.0557717
0.2	0.0707826
0.2	0.0890543
0.2	0.0983913
0.2	0.0381413
0.2	0.0923804
0.2	0.0449891
0.2	0.0581848
0.2	0.0831087
0.2	0.0429565
0.2	0.0174674
0.2	0.0322174
0.2	0.156098
0.2	0.0377826
0.2	0.0233696
0.2	0.0284457
0.2	0.0485217
0.2	0.0686304
0.2	0.0966196
0.2	0.0637717
0.2	0.0534565
0.2	0.101391
0.2	0.0581196
0.2	0.145446
0.2	0.148109
0.2	0.0885109
0.2	0.0658043
0.2	0.0385217
0.2	0.116043
0.2	0.0263152
0.2	0.0236304
0.2	0.0161739
0.2	0.0399565
0.2	0.0482935
0.2	0.0180543
0.2	0.0222174
0.2	0.0108478
0.2	0.0380109
0.2	0.0294565
0.2	0.0430435
0.2	0.0407174
0.2	0.0440652
0.2	0.0446522
0.2	0.0998152
0.2	0.0424348
0.2	0.0636087
0.2	0.0900978
0.2	0.0557935
0.2	0.0298804
0.2	0.0539457
0.2	0.097913
0.2	0.0308261
0.2	0.0344565
0.2	0.0346196
0.2	0.0533261
0.2	0.0227717
0.2	0.0606304
0.2	0.0349783
0.2	0.0151739
0.2	0.0415543
0.2	0.0640109
0.2	0.032
0.2	0.0116848
0.2	0.0224348
0.2	0.162435
0.2	0.11412
0.2	0.163489
0.2	0.0367283
0.2	0.04675
0.2	0.13913
0.2	0.0533478
0.2	0.022663
0.2	0.0765543
0.2	0.0861739
0.2	0.107424
0.2	0.0754674
0.2	0.0813043
0.2	0.121478
0.2	0.140717
0.2	0.0219022
0.2	0.039413
0.2	0.0685
0.2	0.015
0.2	0.019913
0.2	0.0663478
0.2	0.0556848
0.2	0.0371413
0.2	0.0275543
0.2	0.0146304
0.2	0.172098
0.2	0.108304
0.2	0.0429565
0.2	0.026163
0.2	0.103707
0.2	0.0631087
0.2	0.0203587
0.2	0.0286413
0.2	0.0194457
0.2	0.07825
0.2	0.0614565
0.2	0.0565652
0.2	0.0523478
0.2	0.0183913
0.2	0.0248804
0.2	0.0330652
0.2	0.0391196
0.2	0.018337
0.2	0.0198261
0.2	0.0535109
0.2	0.00808696
0.2	0.00478261
0.2	0.0300761
0.2	0.022913
0.2	0.087913
0.2	0.0715217
0.2	0.0783913
0.2	0.049087
0.2	0.0327717
0.2	0.132109
0.2	0.0535109
0.2	0.0214783
0.2	0.0502065
0.2	0.0396848
0.2	0.00753261
0.2	0.0584348
0.2	0.096663
0.2	0.0596522
0.2	0.0277065
0.2	0.0308696
0.2	0.0165543
0.2	0.0227609
0.2	0.0330435
0.2	0.0568696
0.2	0.0419565
0.2	0.0323043
0.2	0.0528804
0.2	0.0535761
0.2	0.0391957
0.2	0.0441957
0.2	0.0277609
0.2	0.0566848
0.2	0.0560978
0.2	0.0277826
0.2	0.0410109
0.2	0.0302826
0.2	0.0336739
0.2	0.0368261
0.2	0.0434674
0.2	0.0552283
0.2	0.0340978
0.2	0.0534783
0.2	0.0394891
0.2	0.0311087
0.2	0.0335109
0.2	0.0641957
0.2	0.0748261
0.2	0.169174
0.2	0.117435
0.2	0.0719022
0.2	0.0670435
0.2	0.0619783
0.2	0.025337
0.2	0.0263696
0.2	0.0373043
0.2	0.0502174
0.2	0.0558696
0.2	0.0485326
0.2	0.0532826
0.2	0.0327826
0.2	0.0229022
0.2	0.0416087
0.2	0.0490109
0.2	0.0488152
0.2	0.0598804
0.2	0.0836522
0.2	0.0423696
0.2	0.0073587
0.2	0.0351196
0.2	0.0313261
0.2	0.0328152
0.2	0.0882065
0.2	0.0711522
0.2	0.1095
0.2	0.137457
0.2	0.109522
0.2	0.0184348
0.2	0.0333043
0.2	0.0393587
0.2	0.0464891
0.2	0.113815
0.2	0.049837
0.2	0.0176196
0.2	0.04075
0.2	0.0405761
0.2	0.0951522
0.2	0.0552826
0.2	0.0604891
0.2	0.0258804
0.2	0.0259891
0.2	0.0237609
0.2	0.014837
0.2	0.0328587
0.2	0.0176087
0.2	0.053587
0.2	0.139576
0.2	0.0845
0.2	0.148054
0.2	0.0775326
0.2	0.168467
0.2	0.0771304
0.2	0.126348
0.2	0.0727391
0.2	0.0844565
0.2	0.0241848
0.2	0.0400978
0.2	0.0217935
0.2	0.0337609
0.2	0.130533
0.2	0.0809348
0.2	0.0285543
0.2	0.0473152
0.2	0.0503913
0.2	0.0594674
0.2	0.0379783
0.2	0.0560652
0.2	0.15688
0.2	0.174772
0.2	0.149
0.2	0.0718043
0.2	0.0528587
0.2	0.0308261
0.2	0.0554239
0.2	0.0171087
0.2	0.0312391
0.2	0.0790761
0.2	0.050913
0.2	0.0362609
0.2	0.0339891
0.2	0.0351848
0.2	0.0545652
0.2	0.0589239
0.2	0.0755978
0.2	0.0457609
0.2	0.0385109
0.2	0.120489
0.2	0.115054
0.2	0.113685
0.2	0.0151087
0.2	0.0859674
0.2	0.0750978
0.2	0.0706739
0.2	0.095837
0.2	0.147902
0.2	0.129685
0.2	0.0560217
0.2	0.0369022
0.2	0.0501522
0.2	0.0540543
0.2	0.0739674
0.2	0.0592826
0.2	0.0298696
0.2	0.0253261
0.2	0.0266739
0.2	0.0229674
0.2	0.0334457
0.2	0.0997717
0.2	0.0621304
0.2	0.0574239
0.2	0.0450109
0.2	0.0219891
0.2	0.045837
0.2	0.0102826
0.2	0.0495217
0.2	0.0210435
0.2	0.0294457
0.2	0.0637609
0.2	0.0452609
0.2	0.0410109
0.2	0.0363696
0.2	0.166641
0.2	0.0615326
0.2	0.0662065
0.2	0.0704891
0.2	0.149522
0.2	0.042663
0.2	0.0925652
0.2	0.0752609
0.2	0.0396196
0.2	0.0183043
0.2	0.019663
0.2	0.0403913
0.2	0.0843696
0.2	0.13912
0.2	0.0332717
0.2	0.0357935
0.2	0.027413
0.2	0.0422065
0.2	0.0528043
0.2	0.0423913
0.2	0.0687935
0.2	0.109533
0.2	0.066413
0.2	0.162804
0.2	0.0771848
0.2	0.0416196
0.2	0.0544457
0.2	0.0752283
0.2	0.0680326
0.2	0.0233261
0.2	0.0641413
0.2	0.0641957
0.2	0.0247717
0.2	0.0644891
0.2	0.0609674
0.2	0.0662283
0.2	0.0113043
0.2	0.0252174
0.2	0.0277391
0.2	0.0735978
0.2	0.0277174
0.2	0.0567717
0.2	0.0484783
0.2	0.012837
0.2	0.0702391
0.2	0.107098
0.2	0.0470652
0.2	0.0307609
0.2	0.0680109
0.2	0.0372826
0.2	0.0928261
0.2	0.0376413
0.2	0.172283
0.2	0.152402
0.2	0.015337
0.2	0.0646739
0.2	0.0386739
0.2	0.0274565
0.2	0.0390435
0.2	0.0173913
0.2	0.0605109
0.2	0.156489
0.2	0.0745217
0.2	0.0708913
0.2	0.0747065
0.2	0.112957
0.2	0.105489
0.2	0.0355109
0.2	0.0289565
0.2	0.0383261
0.2	0.047087
0.2	0.0292065
0.2	0.0426196
0.2	0.0132391
0.2	0.0373913
0.2	0.0175652
0.2	0.0296739
0.2	0.0170652
0.2	0.0258587
0.2	0.013587
0.2	0.0388152
0.2	0.0321413
0.2	0.0145217
0.2	0.127609
0.2	0.157315
0.2	0.107902
0.2	0.047
0.2	0.0329022
0.2	0.0491087
0.2	0.00456522
0.2	0.0774239
0.2	0.0497283
0.2	0.0768913
0.2	0.0310435
0.2	0.0193696
0.2	0.0473478
0.2	0.112109
0.2	0.0238261
0.2	0.0909783
0.2	0.0273261
0.2	0.0195978
0.2	0.0423478
0.2	0.0391087
0.2	0.0329891
0.2	0.0296304
0.2	0.0280435
0.2	0.020087
0.2	0.147152
0.2	0.0494348
0.2	0.0484783
0.2	0.0931304
0.2	0.0200652
0.2	0.0517283
0.2	0.0590217
0.2	0.0323478
0.2	0.0385652
0.2	0.0792826
0.2	0.0304783
0.2	0.0176522
0.2	0.0599891
0.2	0.0526957
0.2	0.0186957
0.2	0.0623804
0.2	0.00303261
0.2	0.0345435
0.2	0.0247826
0.2	0.0406304
0.2	0.0945
0.2	0.102174
0.2	0.0881522
0.2	0.0569565
0.2	0.0635326
0.2	0.0218804
0.2	0.0247283
0.2	0.0247826
0.2	0.0501739
0.2	0.028413
0.2	0.064837
0.2	0.0665109
0.2	0.08675
0.2	0.0395543
0.2	0.0960543
0.2	0.0398261
0.2	0.0182065
0.2	0.0322826
0.2	0.0490652
0.2	0.0373478
0.2	0.0347609
0.2	0.0191304
0.2	0.0392174
0.2	0.171109
0.2	0.142228
0.2	0.117239
0.2	0.123152
0.2	0.0782283
0.2	0.129989
0.2	0.0335
0.2	0.042837
0.2	0.0520652
0.2	0.0163587
0.2	0.0730217
0.2	0.0598043
0.2	0.0501196
0.2	0.0950435
0.2	0.090837
0.2	0.0128478
0.2	0.075663
0.2	0.0460652
0.2	0.0310435
0.2	0.0473261
0.2	0.0415543
0.2	0.0343913
0.2	0.0685435
0.2	0.0373696
0.2	0.0676413
0.2	0.0400217
0.2	0.0930652
0.2	0.133989
0.2	0.0880217
0.2	0.150011
0.2	0.0762391
0.2	0.076913
0.2	0.0540543
0.2	0.0658804
0.2	0.0774457
0.2	0.0658043
0.2	0.11512
0.2	0.0717174
0.2	0.0469674
0.2	0.0350652
0.2	0.0606413
0.2	0.0490978
0.2	0.052413
0.2	0.069913
0.2	0.106957
0.2	0.104163
0.2	0.0988152
0.2	0.0523587
0.2	0.0803478
0.2	0.0409348
0.2	0.0615761
0.2	0.0358587
0.2	0.101163
0.2	0.0549891
0.2	0.117011
0.2	0.167446
0.2	0.0724457
0.2	0.0672065
0.2	0.0463696
0.2	0.0381413
0.2	0.0367391
0.2	0.0395
0.2	0.00738043
0.2	0.0575543
0.2	0.0217609
0.2	0.0449348
0.2	0.173457
0.2	0.103565
0.2	0.102293
0.2	0.15713
0.2	0.0532283
0.2	0.066
0.2	0.05475
0.2	0.0729891
0.2	0.0834783
0.2	0.03175
0.2	0.0174022
0.2	0.0264239
0.2	0.0391848
0.2	0.0392609
0.2	0.0286957
0.2	0.0197065
0.2	0.0463152
0.2	0.0219457
0.2	0.0177391
0.2	0.0160435
0.2	0.0409674
0.2	0.0263696
0.2	0.00227174
0.2	0.0091087
0.2	0.156696
0.2	0.0784022
0.2	0.0866522
0.2	0.0897826
0.2	0.0954783
0.2	0.126674
0.2	0.162467
0.2	0.0621413
0.2	0.0539239
0.2	0.0985652
0.2	0.115054
0.2	0.0745761
0.2	0.0924891
0.2	0.102826
0.2	0.0654022
0.2	0.0610217
0.2	0.076913
0.2	0.0334891
0.2	0.144435
0.2	0.0597391
0.2	0.0406413
0.2	0.11663
0.2	0.0583913
0.2	0.0460109
0.2	0.141315
0.2	0.0960652
0.2	0.0777717
0.2	0.100772
0.2	0.0447174
0.2	0.0474457
0.2	0.0215109
0.2	0.0631522
0.2	0.0842391
0.2	0.0425435
0.2	0.0325435
0.2	0.0763804
0.2	0.0519022
0.2	0.0541196
0.2	0.128707
0.2	0.0506196
0.2	0.0607935
0.2	0.0302935
0.2	0.0287717
0.2	0.0235326
0.2	0.0306522
0.2	0.0488804
0.2	0.0234022
0.2	0.0377935
0.2	0.157152
0.2	0.108739
0.2	0.0524239
0.2	0.103076
0.2	0.109891
0.2	0.111815
0.2	0.112772
0.2	0.0277717
0.2	0.0438478
0.2	0.0480978
0.2	0.0739891
0.2	0.0165761
0.2	0.0791522
0.2	0.0407065
0.2	0.106261
0.2	0.060337
0.2	0.0133587
0.2	0.0184565
0.2	0.0172717
0.2	0.0498043
0.2	0.0144891
0.2	0.0311739
0.2	0.0194891
0.2	0.059087
0.2	0.132489
0.2	0.129935
0.2	0.0957065
0.2	0.0479022
0.2	0.0365326
0.2	0.0821522
0.2	0.0553043
0.2	0.0923043
0.2	0.0540978
0.2	0.0575109
0.2	0.0408152
0.2	0.0191957
0.2	0.087837
0.2	0.0433696
0.2	0.0323804
0.2	0.0514674
0.2	0.0250652
0.2	0.0115761
0.2	0.0631848
0.2	0.0643152
0.2	0.0439022
0.2	0.0459022
0.2	0.047663
0.2	0.0775217
0.2	0.064837
0.2	0.0438152
0.2	0.0676739
0.2	0.12762
0.2	0.068337
0.2	0.0693043
0.2	0.164076
0.2	0.0432174
0.2	0.0490217
0.2	0.061913
0.2	0.023087
0.2	0.0491957
0.2	0.0136196
0.2	0.0807826
0.2	0.0740543
0.2	0.0542065
0.2	0.0164348
0.2	0.0310652
0.2	0.0667826
0.2	0.0122609
0.2	0.0193696
0.2	0.0397717
0.2	0.0332717
0.2	0.0600326
0.2	0.130228
0.2	0.141576
0.2	0.0622065
0.2	0.0724022
0.2	0.0862174
0.2	0.05
0.2	0.0970326
0.2	0.0210652
0.2	0.0225
0.2	0.0309891
0.2	0.0436739
0.2	0.0366304
0.2	0.00757609
0.2	0.00688043
0.2	0.0320435
0.2	0.0491087
0.2	0.0819891
0.2	0.01275
0.2	0.0376739
0.2	0.00742391
0.2	0.130772
0.2	0.159935
0.2	0.132576
0.2	0.129359
0.2	0.0911848
0.2	0.0191196
0.2	0.0490109
0.2	0.0865978
0.2	0.0373478
0.2	0.125533
0.2	0.0584783
0.2	0.0439565
0.2	0.0467174
0.2	0.0246522
0.2	0.0209891
0.2	0.0304457
0.2	0.0256522
0.2	0.0299239
0.2	0.0259565
0.2	0.0292065
0.2	0.0105978
0.2	0.0379783
0.2	0.0131304
0.2	0.0302174
0.2	0.0391413
0.2	0.0824565
0.2	0.10762
0.2	0.0944565
0.2	0.0977174
0.2	0.0972065
0.2	0.153261
0.2	0.070663
0.2	0.0229348
0.2	0.0585652
0.2	0.0670109
0.2	0.0249457
0.2	0.0516196
0.2	0.0932391
0.2	0.047837
0.2	0.0505652
0.2	0.042837
0.2	0.0661522
0.2	0.0262826
0.2	0.0339239
0.2	0.0116522
0.2	0.0580109
0.2	0.0817283
0.2	0.0762717
0.2	0.0735217
0.2	0.0301196
0.2	0.0418587
0.2	0.116293
0.2	0.119576
0.2	0.0796304
0.2	0.0146087
0.2	0.0442391
0.2	0.0235652
0.2	0.0188261
0.2	0.0145326
0.2	0.0525543
0.2	0.0414565
0.2	0.0518152
0.2	0.0240217
0.2	0.0705652
0.2	0.0248696
0.2	0.00665217
0.2	0.0255109
0.2	0.0494457
0.2	0.0361413
0.2	0.175598
0.2	0.0898043
0.2	0.0780978
0.2	0.0908043
0.2	0.0781848
0.2	0.0275978
0.2	0.103978
0.2	0.129587
0.2	0.0370543
0.2	0.101467
0.2	0.0389348
0.2	0.107304
0.2	0.0429239
0.2	0.011337
0.2	0.0388804
0.2	0.0585652
0.2	0.0376848
0.2	0.0643152
0.2	0.0227174
0.2	0.00991304
0.2	0.0560217
0.2	0.0371087
0.2	0.0333043
0.2	0.0286848
0.2	0.0571304
0.2	0.0348696
0.2	0.0838587
0.2	0.03075
0.2	0.0784891
0.2	0.0725543
0.2	0.153783
0.2	0.0604022
0.2	0.134424
0.2	0.145717
0.2	0.0548478
0.2	0.0721413
0.2	0.0346848
0.2	0.0525109
0.2	0.0771413
0.2	0.036663
0.2	0.0180326
0.2	0.0437717
0.2	0.0497283
0.2	0.0305652
0.2	0.0502609
0.2	0.0963261
0.2	0.0735326
0.2	0.13875
0.2	0.0811739
0.2	0.153185
0.2	0.0190435
0.2	0.0240761
0.2	0.0236087
0.2	0.0415435
0.2	0.0400109
0.2	0.0509457
0.2	0.0306848
0.2	0.0388152
0.2	0.036413
0.2	0.00976087
0.2	0.0412391
0.2	0.0316413
0.2	0.0912283
0.2	0.07675
0.2	0.0242717
0.2	0.0474565
0.2	0.0146087
0.2	0.0229674
0.2	0.0793587
0.2	0.115315
0.2	0.110859
0.2	0.034913
0.2	0.0276196
0.2	0.0270326
0.2	0.0317065
0.2	0.0257717
0.2	0.06475
0.2	0.0793043
0.2	0.0709457
0.2	0.0303587
0.2	0.0146196
0.2	0.026663
0.2	0.0719674
0.2	0.08975
0.2	0.0292174
0.2	0.0745109
0.2	0.0566413
0.2	0.0354239
0.2	0.0104239
0.2	0.0529348
0.2	0.0542717
0.2	0.0267283
0.2	0.152413
0.2	0.0912609
0.2	0.0814674
0.2	0.0281304
0.2	0.0704891
0.2	0.0226739
0.2	0.0493587
0.2	0.0414348
0.2	0.0503043
0.2	0.042
0.2	0.0545109
0.2	0.0449457
0.2	0.00772826
0.2	0.0452717
0.2	0.0599022
0.2	0.0263696
0.2	0.0635652
0.2	0.0400761
0.2	0.0892609
0.2	0.0482609
0.2	0.0550109
0.2	0.0176739
0.2	0.0447609
0.2	0.0312826
0.2	0.154207
0.2	0.0941848
0.2	0.0947717
0.2	0.154054
0.2	0.0289239
0.2	0.0821522
0.2	0.0656196
0.2	0.0437391
0.2	0.0782283
0.2	0.0766522
0.2	0.170457
0.2	0.107174
0.2	0.0671848
0.2	0.0538913
0.2	0.069163
0.2	0.062587
0.2	0.0744348
0.2	0.0307826
0.2	0.0517174
0.2	0.0246087
0.2	0.0312391
0.2	0.118815
0.2	0.109739
0.2	0.0395326
0.2	0.0276196
0.2	0.0467609
0.2	0.113185
0.2	0.0241196
0.2	0.0482935
0.2	0.136196
0.2	0.0583913
0.2	0.0417174
0.2	0.05075
0.2	0.167696
0.2	0.0725109
0.2	0.0155435
0.2	0.048663
0.2	0.0245761
0.2	0.030163
0.2	0.0977826
0.2	0.0230435
0.2	0.0490109
0.2	0.0795543
0.2	0.0711957
0.2	0.0167391
0.2	0.025913
0.2	0.143859
0.2	0.116761
0.2	0.029837
0.2	0.129207
0.2	0.108511
0.2	0.0305652
0.2	0.0417935
0.2	0.0429348
0.2	0.0278913
0.2	0.0648043
0.2	0.0561196
0.2	0.0329348
0.2	0.0863043
0.2	0.0489022
0.2	0.0375109
0.2	0.0598152
0.2	0.0253587
0.2	0.0795435
0.2	0.0419022
0.2	0.0399891
0.2	0.0539891
0.2	0.0490978
0.2	0.091337
0.2	0.0673913
0.2	0.0776739
0.2	0.126728
0.2	0.0285109
0.2	0.0399783
0.2	0.0961413
0.2	0.093337
0.2	0.0242065
0.2	0.065587
0.2	0.129174
0.2	0.0215217
0.2	0.0835978
0.2	0.0340109
0.2	0.0603913
0.2	0.0222283
0.2	0.0203913
0.2	0.00857609
0.2	0.0285978
0.2	0.0406413
0.2	0.0251413
0.2	0.0295978
0.2	0.141435
0.2	0.108163
0.2	0.104891
0.2	0.0827283
0.2	0.0569674
0.2	0.0441522
0.2	0.106946
0.2	0.122739
0.2	0.0925652
0.2	0.0648587
0.2	0.125783
0.2	0.0693152
0.2	0.083163
0.2	0.0739565
0.2	0.0439674
0.2	0.0354457
0.2	0.0753587
0.2	0.0605326
0.2	0.0919239
0.2	0.0436196
0.2	0.157022
0.2	0.072
0.2	0.155685
0.2	0.115641
0.2	0.0841196
0.2	0.0867283
0.2	0.0674783
0.2	0.126728
0.2	0.0255543
0.2	0.0134565
0.2	0.0150652
0.2	0.00370652
0.2	0.0992283
0.2	0.138033
0.2	0.086337
0.2	0.0506739
0.2	0.0334457
0.2	0.00926087
0.2	0.0261196
0.2	0.022413
0.2	0.018587
0.2	0.0394348
0.2	0.0149239
0.2	0.0133478
0.2	0.173
0.2	0.090087
0.2	0.145957
0.2	0.0328152
0.2	0.0591522
0.2	0.0736522
0.2	0.0605435
0.2	0.107685
0.2	0.0466957
0.2	0.0945652
0.2	0.0981196
0.2	0.100228
0.2	0.0583804
0.2	0.0600217
0.2	0.0605761
0.2	0.0372391
0.2	0.0890761
0.2	0.171413
0.2	0.176902
0.2	0.0589348
0.2	0.0497174
0.2	0.142413
0.2	0.05225
0.2	0.068587
0.2	0.0674783
0.2	0.0596087
0.2	0.133565
0.2	0.0667065
0.2	0.0862609
0.2	0.0912174
0.2	0.0897717
0.2	0.0340326
0.2	0.0465435
0.2	0.0427826
0.2	0.0500326
0.2	0.029837
0.2	0.05825
0.2	0.043837
0.2	0.0152935
0.2	0.046587
0.2	0.0197609
0.2	0.0236304
0.2	0.06175
0.2	0.0250435
0.2	0.01475
0.2	0.0243043
0.2	0.17
0.2	0.147413
0.2	0.0814239
0.2	0.104152
0.2	0.0628696
0.2	0.06
0.2	0.0534348
0.2	0.0877065
0.2	0.114326
0.2	0.0235761
0.2	0.0240326
0.2	0.0528043
0.2	0.0313587
0.2	0.0183043
0.2	0.028913
0.2	0.0439239
0.2	0.0285761
0.2	0.024337
0.2	0.0960978
0.2	0.0155326
0.2	0.00806522
0.2	0.0434783
0.2	0.0291848
0.2	0.0716413
0.2	0.0135761
0.2	0.10538
0.2	0.0231196
0.2	0.0553587
0.2	0.0840109
0.2	0.0491848
0.2	0.0482283
0.2	0.0825326
0.2	0.0751848
0.2	0.0386413
0.2	0.0742609
0.2	0.0473043
0.2	0.0373043
0.2	0.0312391
0.2	0.0261196
0.2	0.0326413
0.2	0.031337
0.2	0.0895543
0.2	0.0107609
0.2	0.0132391
0.2	0.121826
0.2	0.0290326
0.2	0.0273696
0.2	0.0354891
0.2	0.0552826
0.2	0.144337
0.2	0.0648913
0.2	0.103848
0.2	0.0589457
0.2	0.0520109
0.2	0.0131522
0.2	0.0364783
0.2	0.0517065
0.2	0.0453478
0.2	0.0342609
0.2	0.0145978
0.2	0.0404348
0.2	0.0200435
0.2	0.0147065
0.2	0.0520435
0.2	0.0550435
0.2	0.0396848
0.2	0.0560435
0.2	0.02875
0.2	0.0826413
0.2	0.0446413
0.2	0.0544891
0.2	0.0940978
0.2	0.0289239
0.2	0.178022
0.2	0.0533804
0.2	0.103522
0.2	0.0244348
0.2	0.0630761
0.2	0.0421522
0.2	0.0205761
0.2	0.109707
0.2	0.0577609
0.2	0.038837
0.2	0.140391
0.2	0.0685109
0.2	0.0734783
0.2	0.11437
0.2	0.0732283
0.2	0.0507391
0.2	0.051337
0.2	0.0439022
0.2	0.061913
0.2	0.051
0.2	0.0212065
0.2	0.0568696
0.2	0.0128804
0.2	0.0672717
0.2	0.0165
0.2	0.123054
0.2	0.0205543
0.2	0.0393043
0.2	0.100163
0.2	0.0278696
0.2	0.160739
0.2	0.131533
0.2	0.161185
0.2	0.0328587
0.2	0.0965
0.2	0.023837
0.2	0.0671848
0.2	0.0593696
0.2	0.0971196
0.2	0.0909239
0.2	0.112935
0.2	0.109783
0.2	0.0650652
0.2	0.107902
0.2	0.0601848
0.2	0.032837
0.2	0.0994891
0.2	0.114717
0.2	0.0897391
0.2	0.0448913
0.2	0.102141
0.2	0.140902
0.2	0.031163
0.2	0.0716739
0.2	0.152185
0.2	0.0939457
0.2	0.151239
0.2	0.0529457
0.2	0.0686848
0.2	0.108402
0.2	0.031413
0.2	0.0657174
0.2	0.041587
0.2	0.0221087
0.2	0.0463587
0.2	0.0231739
0.2	0.0264565
0.2	0.0290109
0.2	0.153859
0.2	0.118652
0.2	0.0418152
0.2	0.072413
0.2	0.0779022
0.2	0.112946
0.2	0.0591413
0.2	0.0927826
0.2	0.0656196
0.2	0.124217
0.2	0.0875652
0.2	0.0585217
0.2	0.137739
0.2	0.0790978
0.2	0.0644022
0.2	0.0279783
0.2	0.0371413
0.2	0.0529565
0.2	0.0344239
0.2	0.162457
0.2	0.0495435
0.2	0.0528152
0.2	0.0564022
0.2	0.0577826
0.2	0.0944565
0.2	0.0679239
0.2	0.0333478
0.2	0.0797283
0.2	0.0217826
0.2	0.02675
0.2	0.0911739
0.2	0.0405978
0.2	0.0678804
0.2	0.0365543
0.2	0.0344565
0.2	0.0362283
0.2	0.0594022
0.2	0.0373587
0.2	0.0192717
0.2	0.104478
0.2	0.0201739
0.2	0.0189783
0.2	0.0164891
0.2	0.00903261
0.2	0.0611304
0.2	0.0239022
0.2	0.0438478
0.2	0.0955978
0.2	0.0895
0.2	0.0527717
0.2	0.112663
0.2	0.0714783
0.2	0.0578261
0.2	0.0403913
0.2	0.0541304
0.2	0.0920326
0.2	0.024913
0.2	0.0200109
0.2	0.0374348
0.2	0.138522
0.2	0.147978
0.2	0.0583804
0.2	0.02075
0.2	0.0628587
0.2	0.0399457
0.2	0.0849674
0.2	0.0801522
0.2	0.0331304
0.2	0.0440652
0.2	0.0481413
0.2	0.0549348
0.2	0.0220543
0.2	0.0444239
0.2	0.0439891
0.2	0.041413
0.2	0.0206304
0.2	0.0280217
0.2	0.0159022
0.2	0.0154022
0.2	0.0146957
0.2	0.0208152
0.2	0.0914348
0.2	0.164565
0.2	0.0654348
0.2	0.0304565
0.2	0.115511
0.2	0.0856957
0.2	0.0196957
0.2	0.117957
0.2	0.031087
0.2	0.0362283
0.2	0.0742391
0.2	0.0866087
0.2	0.0305435
0.2	0.0604022
0.2	0.0641957
0.2	0.0120652
0.2	0.0356413
0.2	0.0590109
0.2	0.0352935
0.2	0.0117283
0.2	0.0134891
0.2	0.0320761
0.2	0.0151196
0.2	0.0271957
0.2	0.0260217
0.2	0.0499891
0.2	0.103489
0.2	0.0874783
0.2	0.073913
0.2	0.118391
0.2	0.01275
0.2	0.0488913
0.2	0.094337
0.2	0.0313696
0.2	0.0278696
0.2	0.0489783
0.2	0.0262717
0.2	0.0289783
0.2	0.0346087
0.2	0.057163
0.2	0.090337
0.2	0.0531739
0.2	0.104957
0.2	0.0283804
0.2	0.0461304
0.2	0.0919239
0.2	0.0175761
0.2	0.0708696
0.2	0.150554
0.2	0.0590978
0.2	0.0546957
0.2	0.0828478
0.2	0.0825326
0.2	0.0756739
0.2	0.134957
0.2	0.0747391
0.2	0.0859565
0.2	0.0599239
0.2	0.0695652
0.2	0.0122609
0.2	0.0638261
0.2	0.0585326
0.2	0.0910761
0.2	0.0648913
0.2	0.0320109
0.2	0.013
0.2	0.0270978
0.2	0.0119239
0.2	0.0134457
0.2	0.0149022
0.2	0.0229674
0.2	0.130359
0.2	0.0517717
0.2	0.0300978
0.2	0.133696
0.2	0.0660435
0.2	0.0246739
0.2	0.0963152
0.2	0.0952283
0.2	0.0939783
0.2	0.0379348
0.2	0.0347826
0.2	0.035913
0.2	0.0700435
0.2	0.0359565
0.2	0.0490217
0.2	0.0265978
0.2	0.0634565
0.2	0.0408261
0.2	0.0505109
0.2	0.0330326
0.2	0.0691957
0.2	0.0462174
0.2	0.062663
0.2	0.0757283
0.2	0.132457
0.2	0.142978
0.2	0.0581087
0.2	0.0406413
0.2	0.130152
0.2	0.0526522
0.2	0.0175978
0.2	0.0203152
0.2	0.0837065
0.2	0.0605652
0.2	0.0495109
0.2	0.0351304
0.2	0.0438152
0.2	0.0402065
0.2	0.0821087
0.2	0.00958696
0.2	0.0466739
0.2	0.0182065
0.2	0.0487174
0.2	0.0289783
0.2	0.0232283
0.2	0.0382609
0.2	0.01575
0.2	0.0996087
0.2	0.08525
0.2	0.120359
0.2	0.133152
0.2	0.0633696
0.2	0.11637
0.2	0.0337283
0.2	0.0525543
0.2	0.0367391
0.2	0.0768478
0.2	0.0527283
0.2	0.0997826
0.2	0.0861848
0.2	0.0460543
0.2	0.0556087
0.2	0.0486304
0.2	0.0171957
0.2	0.0196522
0.2	0.0308478
0.2	0.0643587
0.2	0.121609
0.2	0.0382717
0.2	0.0809239
0.2	0.0216739
0.2	0.0619891
0.2	0.0938043
0.2	0.0564457
0.2	0.0393152
0.2	0.107641
0.2	0.0256087
0.2	0.0648696
0.2	0.0358261
0.2	0.0147174
0.2	0.0648152
0.2	0.0133152
0.2	0.024087
0.2	0.0321087
0.2	0.0416196
0.2	0.0374565
[truncated: 927 more rows]
