# Supplementary material for: Stochastic bond dynamics facilitates alignment of malaria parasite at erythrocyte membrane upon invasion
Source: eLife journal article supplement (doi:10.7554/elife.56500), 2020-05-18
Supplement: fig6-data1 [file Parasite_displacement.xlsx]

## Sheet: Sheet1
kon_long	kon_short	koff	displacement
0.05	4	0.5	0.0242283
0.05	4	0.5	0.0182609
0.05	4	0.5	0.0124783
0.05	4	0.5	0.0192717
0.05	4	0.5	0.0183043
0.05	4	0.5	0.01375
0.05	4	0.5	0.0184891
0.05	4	0.5	0.00643478
0.05	4	0.5	0.00502174
0.05	4	0.5	0.009
0.05	4	0.5	0.0204239
0.05	4	0.5	0.0260978
0.05	4	0.5	0.0200109
0.05	4	0.5	0.0224239
0.05	4	0.5	0.0285652
0.05	4	0.5	0.00815217
0.05	4	0.5	0.0135978
0.05	4	0.5	0.0139239
0.05	4	0.5	0.00986957
0.05	4	0.5	0.015163
0.05	4	0.5	0.0156739
0.05	4	0.5	0.0230326
0.05	4	0.5	0.0292935
0.05	4	0.5	0.0321413
0.05	4	0.5	0.0260109
0.05	4	0.5	0.0300109
0.05	4	0.5	0.0223043
0.05	4	0.5	0.0149239
0.05	4	0.5	0.00702174
0.05	4	0.5	0.01575
0.05	4	0.5	0.0241848
0.05	4	0.5	0.00548913
0.05	4	0.5	0.02025
0.05	4	0.5	0.0201413
0.05	4	0.5	0.031413
0.05	4	0.5	0.00806522
0.05	4	0.5	0.0158696
0.05	4	0.5	0.0222609
0.05	4	0.5	0.0241196
0.05	4	0.5	0.014837
0.05	4	0.5	0.0252065
0.05	4	0.5	0.0109022
0.05	4	0.5	0.0107391
0.05	4	0.5	0.0130652
0.05	4	0.5	0.00977174
0.05	4	0.5	0.0250217
0.05	4	0.5	0.0177717
0.05	4	0.5	0.0268478
0.05	4	0.5	0.0201957
0.05	4	0.5	0.0339891
0.05	4	0.5	0.017913
0.05	4	0.5	0.0138043
0.05	4	0.5	0.0150326
0.05	4	0.5	0.00491304
0.05	4	0.5	0.0214348
0.05	4	0.5	0.0123587
0.05	4	0.5	0.00618478
0.05	4	0.5	0.0142391
0.05	4	0.5	0.0166739
0.05	4	0.5	0.0138804
0.05	4	0.5	0.0419239
0.05	4	0.5	0.00822826
0.05	4	0.5	0.0249348
0.05	4	0.5	0.0190978
0.05	4	0.5	0.018413
0.05	4	0.5	0.0073587
0.05	4	0.5	0.0131196
0.05	4	0.5	0.00931522
0.05	4	0.5	0.0100435
0.05	4	0.5	0.0104239
0.05	4	0.5	0.023837
0.05	4	0.5	0.00627174
0.05	4	0.5	0.0217283
0.05	4	0.5	0.0473913
0.05	4	0.5	0.0286848
0.05	4	0.5	0.0262065
0.05	4	0.5	0.0163696
0.05	4	0.5	0.00805435
0.05	4	0.5	0.00879348
0.05	4	0.5	0.0122826
0.05	4	0.5	0.0204565
0.05	4	0.5	0.021837
0.05	4	0.5	0.0128043
0.05	4	0.5	0.0135761
0.05	4	0.5	0.0131413
0.05	4	0.5	0.0128804
0.05	4	0.5	0.0156848
0.05	4	0.5	0.00757609
0.05	4	0.5	0.00938043
0.05	4	0.5	0.00755435
0.05	4	0.5	0.00523913
0.05	4	0.5	0.00747826
0.05	4	0.5	0.0148696
0.05	4	0.5	0.0215326
0.05	4	0.5	0.01625
0.05	4	0.5	0.0122717
0.05	4	0.5	0.0266848
0.05	4	0.5	0.0159674
0.05	4	0.5	0.0237174
0.05	4	0.5	0.00907609
0.05	4	0.5	0.0309674
0.05	4	0.5	0.0178152
0.05	4	0.5	0.0230109
0.05	4	0.5	0.0110652
0.05	4	0.5	0.0209674
0.05	4	0.5	0.0253043
0.05	4	0.5	0.0254674
0.05	4	0.5	0.0287174
0.05	4	0.5	0.0276196
0.05	4	0.5	0.0100652
0.05	4	0.5	0.0120435
0.05	4	0.5	0.0425217
0.05	4	0.5	0.0133261
0.05	4	0.5	0.0142609
0.05	4	0.5	0.029
0.05	4	0.5	0.0235
0.05	4	0.5	0.0170652
0.05	4	0.5	0.00771739
0.05	4	0.5	0.00484783
0.05	4	0.5	0.00268478
0.05	4	0.5	0.0102717
0.05	4	0.5	0.0209457
0.05	4	0.5	0.0139674
0.05	4	0.5	0.0247826
0.05	4	0.5	0.0158804
0.05	4	0.5	0.00448913
0.05	4	0.5	0.00606522
0.05	4	0.5	0.00992391
0.05	4	0.5	0.0174565
0.05	4	0.5	0.0109239
0.05	4	0.5	0.00901087
0.05	4	0.5	0.0168804
0.05	4	0.5	0.0263152
0.05	4	0.5	0.0163261
0.05	4	0.5	0.00578261
0.05	4	0.5	0.0286848
0.05	4	0.5	0.0249022
0.05	4	0.5	0.0118043
0.05	4	0.5	0.00852174
0.05	4	0.5	0.0194457
0.05	4	0.5	0.0121739
0.05	4	0.5	0.0223913
0.05	4	0.5	0.0226739
0.05	4	0.5	0.0270543
0.05	4	0.5	0.0190109
0.05	4	0.5	0.0132609
0.05	4	0.5	0.017087
0.05	4	0.5	0.0201522
0.05	4	0.5	0.0178261
0.05	4	0.5	0.0175543
0.05	4	0.5	0.0260109
0.05	4	0.5	0.0131413
0.05	4	0.5	0.00758696
0.05	4	0.5	0.0115
0.05	4	0.5	0.00446739
0.05	4	0.5	0.00470652
0.05	4	0.5	0.0239783
0.05	4	0.5	0.0281957
0.05	4	0.5	0.0428587
0.05	4	0.5	0.0128478
0.05	4	0.5	0.00163043
0.05	4	0.5	0.0312174
0.05	4	0.5	0.0145
0.05	4	0.5	0.0081413
0.05	4	0.5	0.0130217
0.05	4	0.5	0.0292935
0.05	4	0.5	0.00613043
0.05	4	0.5	0.0146087
0.05	4	0.5	0.0145
0.05	4	0.5	0.0260652
0.05	4	0.5	0.00940217
0.05	4	0.5	0.0088913
0.05	4	0.5	0.00517391
0.05	4	0.5	0.0193913
0.05	4	0.5	0.031413
0.05	4	0.5	0.0252717
0.05	4	0.5	0.0214239
0.05	4	0.5	0.0198478
0.05	4	0.5	0.00652174
0.05	4	0.5	0.0271522
0.05	4	0.5	0.0189783
0.05	4	0.5	0.0105543
0.05	4	0.5	0.0131196
0.05	4	0.5	0.0169674
0.05	4	0.5	0.0136848
0.05	4	0.5	0.0127283
0.05	4	0.5	0.00622826
0.05	4	0.5	0.0116304
0.05	4	0.5	0.0115326
0.05	4	0.5	0.0169022
0.05	4	0.5	0.00988043
0.05	4	0.5	0.00422826
0.05	4	0.5	0.0217609
0.05	4	0.5	0.0174239
0.05	4	0.5	0.0181739
0.05	4	0.5	0.0295652
0.05	4	0.5	0.0186848
0.05	4	0.5	0.0174239
0.05	4	0.5	0.011587
0.05	4	0.5	0.0124457
0.05	4	0.5	0.0191087
0.05	4	0.5	0.0278804
0.05	4	0.5	0.0314891
0.05	4	0.5	0.00253261
0.05	4	0.5	0.0113261
0.05	4	0.5	0.010087
0.05	4	0.5	0.0119565
0.05	4	0.5	0.02425
0.05	4	0.5	0.0126739
0.05	4	0.5	0.0031087
0.05	4	0.5	0.0173804
0.05	4	0.5	0.0232717
0.05	4	0.5	0.00552174
0.05	4	0.5	0.0272065
0.05	4	0.5	0.0066087
0.05	4	0.5	0.0103043
0.05	4	0.5	0.0267935
0.05	4	0.5	0.0201957
0.05	4	0.5	0.00948913
0.05	4	0.5	0.013413
0.05	4	0.5	0.0192065
0.05	4	0.5	0.0129674
0.05	4	0.5	0.00940217
0.05	4	0.5	0.0160217
0.05	4	0.5	0.0198696
0.05	4	0.5	0.0131087
0.05	4	0.5	0.0312065
0.05	4	0.5	0.0210217
0.05	4	0.5	0.0188043
0.05	4	0.5	0.0132283
0.05	4	0.5	0.0132391
0.05	4	0.5	0.01275
0.05	4	0.5	0.00707609
0.05	4	0.5	0.0423913
0.05	4	0.5	0.0210109
0.05	4	0.5	0.0134022
0.05	4	0.5	0.011413
0.05	4	0.5	0.0110435
0.05	4	0.5	0.0279457
0.05	4	0.5	0.0123804
0.05	4	0.5	0.0276087
0.05	4	0.5	0.0328261
0.05	4	0.5	0.0234457
0.05	4	0.5	0.01225
0.05	4	0.5	0.0187391
0.05	4	0.5	0.0149239
0.05	4	0.5	0.0177174
0.05	4	0.5	0.0114457
0.05	4	0.5	0.0220326
0.05	4	0.5	0.0265217
0.05	4	0.5	0.0277935
0.05	4	0.5	0.044
0.05	4	0.5	0.0209674
0.05	4	0.5	0.0150217
0.05	4	0.5	0.00471739
0.05	4	0.5	0.0286196
0.05	4	0.5	0.038913
0.05	4	0.5	0.0150978
0.05	4	0.5	0.0201413
0.05	4	0.5	0.0133913
0.05	4	0.5	0.0179239
0.05	4	0.5	0.0114891
0.05	4	0.5	0.00711957
0.05	4	0.5	0.0103152
0.05	4	0.5	0.00552174
0.05	4	0.5	0.0107174
0.05	4	0.5	0.013663
0.05	4	0.5	0.0267826
0.05	4	0.5	0.01775
0.05	4	0.5	0.0113587
0.05	4	0.5	0.00446739
0.05	4	0.5	0.00741304
0.05	4	0.5	0.0174457
0.05	4	0.5	0.0126304
0.05	4	0.5	0.0115761
0.05	4	0.5	0.017587
0.05	4	0.5	0.0326848
0.05	4	0.5	0.0184239
0.05	4	0.5	0.0170543
0.05	4	0.5	0.0219457
0.05	4	0.5	0.0207609
0.05	4	0.5	0.0220652
0.05	4	0.5	0.0195978
0.05	4	0.5	0.0135978
0.05	4	0.5	0.0196087
0.05	4	0.5	0.0206413
0.05	4	0.5	0.0153696
0.05	4	0.5	0.0215543
0.05	4	0.5	0.0174348
0.05	4	0.5	0.012663
0.05	4	1	0.0507174
0.05	4	1	0.0231739
0.05	4	1	0.0227717
0.05	4	1	0.0331957
0.05	4	1	0.0617391
0.05	4	1	0.0299457
0.05	4	1	0.0372826
0.05	4	1	0.00742391
0.05	4	1	0.0399022
0.05	4	1	0.0313043
0.05	4	1	0.0325978
0.05	4	1	0.0489565
0.05	4	1	0.0138913
0.05	4	1	0.0129348
0.05	4	1	0.0507065
0.05	4	1	0.0348261
0.05	4	1	0.0251087
0.05	4	1	0.0286522
0.05	4	1	0.0216957
0.05	4	1	0.028663
0.05	4	1	0.027587
0.05	4	1	0.0600435
0.05	4	1	0.0272609
0.05	4	1	0.0236957
0.05	4	1	0.0121957
0.05	4	1	0.0579022
0.05	4	1	0.0537826
0.05	4	1	0.0226957
0.05	4	1	0.00631522
0.05	4	1	0.0549674
0.05	4	1	0.0584891
0.05	4	1	0.0414348
0.05	4	1	0.0188261
0.05	4	1	0.0339239
0.05	4	1	0.0173478
0.05	4	1	0.0150543
0.05	4	1	0.0287609
0.05	4	1	0.013587
0.05	4	1	0.0174348
0.05	4	1	0.0240761
0.05	4	1	0.0207174
0.05	4	1	0.0244239
0.05	4	1	0.0104239
0.05	4	1	0.0265217
0.05	4	1	0.0342174
0.05	4	1	0.035
0.05	4	1	0.0260652
0.05	4	1	0.0145
0.05	4	1	0.0254674
0.05	4	1	0.0359674
0.05	4	1	0.0198696
0.05	4	1	0.0356413
0.05	4	1	0.0141739
0.05	4	1	0.0326739
0.05	4	1	0.0374022
0.05	4	1	0.0331848
0.05	4	1	0.0175543
0.05	4	1	0.019587
0.05	4	1	0.0162065
0.05	4	1	0.0190543
0.05	4	1	0.0151087
0.05	4	1	0.0128913
0.05	4	1	0.0249239
0.05	4	1	0.0515543
0.05	4	1	0.0577174
0.05	4	1	0.0249891
0.05	4	1	0.0343152
0.05	4	1	0.00779348
0.05	4	1	0.0702609
0.05	4	1	0.0684783
0.05	4	1	0.0447391
0.05	4	1	0.0264022
0.05	4	1	0.0209565
0.05	4	1	0.0287717
0.05	4	1	0.0371848
0.05	4	1	0.0493913
0.05	4	1	0.030913
0.05	4	1	0.0359022
0.05	4	1	0.0298913
0.05	4	1	0.0427283
0.05	4	1	0.0123587
0.05	4	1	0.0200978
0.05	4	1	0.0303696
0.05	4	1	0.0436196
0.05	4	1	0.0513913
0.05	4	1	0.0326304
0.05	4	1	0.0284674
0.05	4	1	0.0133152
0.05	4	1	0.027837
0.05	4	1	0.0379457
0.05	4	1	0.0194239
0.05	4	1	0.0153261
0.05	4	1	0.0330543
0.05	4	1	0.0471304
0.05	4	1	0.0560652
0.05	4	1	0.0297065
0.05	4	1	0.0306304
0.05	4	1	0.028163
0.05	4	1	0.0121196
0.05	4	1	0.0206413
0.05	4	1	0.0405543
0.05	4	1	0.0483804
0.05	4	1	0.0149891
0.05	4	1	0.0458261
0.05	4	1	0.04575
0.05	4	1	0.0399022
0.05	4	1	0.0139891
0.05	4	1	0.0165978
0.05	4	1	0.0257065
0.05	4	1	0.0207935
0.05	4	1	0.015587
0.05	4	1	0.0163804
0.05	4	1	0.0292283
0.05	4	1	0.0274891
0.05	4	1	0.0112935
0.05	4	1	0.0400435
0.05	4	1	0.0102609
0.05	4	1	0.0445326
0.05	4	1	0.0333696
0.05	4	1	0.0342391
0.05	4	1	0.0332391
0.05	4	1	0.0228804
0.05	4	1	0.0117935
0.05	4	1	0.0344565
0.05	4	1	0.0355
0.05	4	1	0.0390326
0.05	4	1	0.0282717
0.05	4	1	0.0170217
0.05	4	1	0.00831522
0.05	4	1	0.0247174
0.05	4	1	0.0259022
0.05	4	1	0.0154565
0.05	4	1	0.0352391
0.05	4	1	0.0215761
0.05	4	1	0.0460217
0.05	4	1	0.0028587
0.05	4	1	0.0441522
0.05	4	1	0.0702609
0.05	4	1	0.0145543
0.05	4	1	0.0421522
0.05	4	1	0.0450435
0.05	4	1	0.0264457
0.05	4	1	0.0316304
0.05	4	1	0.0618804
0.05	4	1	0.0400435
0.05	4	1	0.00997826
0.05	4	1	0.0212717
0.05	4	1	0.0234239
0.05	4	1	0.0367391
0.05	4	1	0.0358587
0.05	4	1	0.0293696
0.05	4	1	0.0245109
0.05	4	1	0.0402391
0.05	4	1	0.0346848
0.05	4	1	0.0541087
0.05	4	1	0.0191739
0.05	4	1	0.0244674
0.05	4	1	0.0318913
0.05	4	1	0.0256087
0.05	4	1	0.0314565
0.05	4	1	0.0295652
0.05	4	1	0.039587
0.05	4	1	0.0134022
0.05	4	1	0.017087
0.05	4	1	0.0409239
0.05	4	1	0.00723913
0.05	4	1	0.0161957
0.05	4	1	0.0378043
0.05	4	1	0.032337
0.05	4	1	0.0290761
0.05	4	1	0.0267174
0.05	4	1	0.042913
0.05	4	1	0.0363152
0.05	4	1	0.0214783
0.05	4	1	0.038087
0.05	4	1	0.020087
0.05	4	1	0.0404348
0.05	4	1	0.0336522
0.05	4	1	0.0512935
0.05	4	1	0.0446304
0.05	4	1	0.0190652
0.05	4	1	0.02375
0.05	4	1	0.00698913
0.05	4	1	0.0248261
0.05	4	1	0.0302391
0.05	4	1	0.0264565
0.05	4	1	0.0360543
0.05	4	1	0.0335217
0.05	4	1	0.0135978
0.05	4	1	0.0317826
0.05	4	1	0.0205543
0.05	4	1	0.0501957
0.05	4	1	0.02225
0.05	4	1	0.016087
0.05	4	1	0.031087
0.05	4	1	0.0119022
0.05	4	1	0.0150217
0.05	4	1	0.0224348
0.05	4	1	0.0295543
0.05	4	1	0.0186739
0.05	4	1	0.0492826
0.05	4	1	0.0720217
0.05	4	1	0.0137609
0.05	4	1	0.0321304
0.05	4	1	0.0258478
0.05	4	1	0.0220217
0.05	4	1	0.0206957
0.05	4	1	0.0179674
0.05	4	1	0.0157717
0.05	4	1	0.00842391
0.05	4	1	0.0389348
0.05	4	1	0.0277609
0.05	4	1	0.0240435
0.05	4	1	0.0287391
0.05	4	1	0.0413043
0.05	4	1	0.0345
0.05	4	1	0.0209565
0.05	4	1	0.016663
0.05	4	1	0.00340217
0.05	4	1	0.0267391
0.05	4	1	0.0174239
0.05	4	1	0.0208696
0.05	4	1	0.0454674
0.05	4	1	0.0568261
0.05	4	1	0.0432826
0.05	4	1	0.0414783
0.05	4	1	0.0270109
0.05	4	1	0.0100652
0.05	4	1	0.0210217
0.05	4	1	0.0256413
0.05	4	1	0.0190761
0.05	4	1	0.0134239
0.05	4	1	0.0305978
0.05	4	1	0.0344348
0.05	4	1	0.0338478
0.05	4	1	0.0330543
0.05	4	1	0.0390543
0.05	4	1	0.0274457
0.05	4	1	0.0346196
0.05	4	1	0.00828261
0.05	4	1	0.0203913
0.05	4	1	0.0189565
0.05	4	1	0.0476522
0.05	4	1	0.0292717
0.05	4	1	0.0539891
0.05	4	1	0.0189348
0.05	4	1	0.0193587
0.05	4	1	0.0170652
0.05	4	1	0.0379348
0.05	4	1	0.0311739
0.05	4	1	0.0373804
0.05	4	1	0.0150652
0.05	4	1	0.0150109
0.05	4	1	0.0165435
0.05	4	1	0.0182065
0.05	4	1	0.0306739
0.05	4	1	0.0151413
0.05	4	1	0.0315326
0.05	4	1	0.0340652
0.05	4	1	0.0373587
0.05	4	1	0.0241957
0.05	4	1	0.0150326
0.05	4	1	0.0127283
0.05	4	1	0.0332391
0.05	4	1	0.031913
0.05	4	1	0.0244348
0.05	4	1	0.0185435
0.05	4	1	0.00842391
0.05	4	1	0.00651087
0.05	4	1	0.0285761
0.05	4	1	0.0588913
0.05	4	1	0.0464239
0.05	4	1	0.0246087
0.05	4	1	0.0271196
0.05	4	1	0.0174457
0.05	4	1	0.0176522
0.05	4	1	0.0361413
0.05	4	1	0.0270652
0.05	4	1	0.0266413
0.05	4	1	0.0335652
0.05	4	1	0.0405109
0.05	4	1	0.00373913
0.05	4	1	0.00772826
0.05	4	1	0.0378696
0.05	4	1	0.0242935
0.05	4	1	0.0147935
0.05	4	1	0.0216848
0.05	4	1	0.0225
0.05	4	1	0.0148913
0.05	4	1	0.0265652
0.05	4	1	0.033837
0.05	4	1	0.0331413
0.05	4	1	0.0268587
0.05	4	1	0.0186087
0.05	4	1	0.0154348
0.05	4	1	0.0384674
0.05	4	1	0.0267065
0.05	4	1	0.0129348
0.05	4	1	0.0623696
0.05	4	1	0.0358913
0.05	4	1	0.0131196
0.05	4	1	0.0194239
0.05	4	1	0.0339783
0.05	4	1	0.0218478
0.05	4	1	0.0240543
0.05	4	1	0.0035
0.05	4	1	0.0245543
0.05	4	1	0.035
0.05	4	1	0.0274783
0.05	4	1	0.0343261
0.05	4	1	0.0181304
0.05	4	1	0.0203913
0.05	4	1	0.0261087
0.05	4	1	0.0126087
0.05	4	1	0.0482935
0.05	4	1	0.0352174
0.05	4	1	0.0403261
0.05	4	1	0.0542826
0.05	4	1	0.00831522
0.05	4	1	0.0240109
0.05	4	1	0.0296739
0.05	4	1	0.0176087
0.05	4	1	0.0648261
0.05	4	1	0.0347826
0.05	4	1	0.0472065
0.05	4	1	0.0128043
0.05	4	1	0.0387174
0.05	4	1	0.0266196
0.05	4	1	0.0631304
0.05	4	1	0.0153043
0.05	4	1	0.0548696
0.05	4	2	0.168837
0.05	4	2	0.0770652
0.05	4	2	0.131478
0.05	4	2	0.100674
0.05	4	2	0.0853804
0.05	4	2	0.118793
0.05	4	2	0.0568804
0.05	4	2	0.171
0.05	4	2	0.0330326
0.05	4	2	0.0424348
0.05	4	2	0.0307283
0.05	4	2	0.100065
0.05	4	2	0.0709239
0.05	4	2	0.0264239
0.05	4	2	0.0273478
0.05	4	2	0.0283913
0.05	4	2	0.0236739
0.05	4	2	0.137587
0.05	4	2	0.0110761
0.05	4	2	0.0209891
0.05	4	2	0.0214239
0.05	4	2	0.0326957
0.05	4	2	0.0329457
0.05	4	2	0.0363696
0.05	4	2	0.0160326
0.05	4	2	0.153674
0.05	4	2	0.0815
0.05	4	2	0.0243587
0.05	4	2	0.0796957
0.05	4	2	0.121391
0.05	4	2	0.132587
0.05	4	2	0.0378152
0.05	4	2	0.13125
0.05	4	2	0.039163
0.05	4	2	0.0732826
0.05	4	2	0.0459674
0.05	4	2	0.0241848
0.05	4	2	0.0566196
0.05	4	2	0.159728
0.05	4	2	0.137098
0.05	4	2	0.0804674
0.05	4	2	0.0620761
0.05	4	2	0.0563478
0.05	4	2	0.112576
0.05	4	2	0.15313
0.05	4	2	0.0513804
0.05	4	2	0.114587
0.05	4	2	0.068913
0.05	4	2	0.0910217
0.05	4	2	0.103435
0.05	4	2	0.0254891
0.05	4	2	0.15312
0.05	4	2	0.0899674
0.05	4	2	0.109467
0.05	4	2	0.102728
0.05	4	2	0.112674
0.05	4	2	0.118641
0.05	4	2	0.0218261
0.05	4	2	0.0861087
0.05	4	2	0.0598261
0.05	4	2	0.0571087
0.05	4	2	0.034
0.05	4	2	0.0649348
0.05	4	2	0.0331739
0.05	4	2	0.0139239
0.05	4	2	0.0247717
0.05	4	2	0.0306304
0.05	4	2	0.0980326
0.05	4	2	0.0822065
0.05	4	2	0.0203152
0.05	4	2	0.0569565
0.05	4	2	0.0971196
0.05	4	2	0.0581087
0.05	4	2	0.0885
0.05	4	2	0.0792391
0.05	4	2	0.0491196
0.05	4	2	0.0785435
0.05	4	2	0.0652717
0.05	4	2	0.0879022
0.05	4	2	0.0377065
0.05	4	2	0.0755761
0.05	4	2	0.0289239
0.05	4	2	0.0633261
0.05	4	2	0.0956522
0.05	4	2	0.0358043
0.05	4	2	0.0561957
0.05	4	2	0.0893587
0.05	4	2	0.044163
0.05	4	2	0.169967
0.05	4	2	0.0622283
0.05	4	2	0.104641
0.05	4	2	0.0794348
0.05	4	2	0.148457
0.05	4	2	0.160913
0.05	4	2	0.0773913
0.05	4	2	0.183337
0.05	4	2	0.0479891
0.05	4	2	0.0823587
0.05	4	2	0.0239239
0.05	4	2	0.0605326
0.05	4	2	0.0589457
0.05	4	2	0.0133696
0.05	4	2	0.0665978
0.05	4	2	0.0169348
0.05	4	2	0.127848
0.05	4	2	0.0392174
0.05	4	2	0.0695978
0.05	4	2	0.0640978
0.05	4	2	0.0557283
0.05	4	2	0.0898478
0.05	4	2	0.024663
0.05	4	2	0.0846522
0.05	4	2	0.12463
0.05	4	2	0.126891
0.05	4	2	0.063163
0.05	4	2	0.049913
0.05	4	2	0.0452717
0.05	4	2	0.0233804
0.05	4	2	0.0423913
0.05	4	2	0.0561739
0.05	4	2	0.0391848
0.05	4	2	0.0422826
0.05	4	2	0.041087
0.05	4	2	0.0384022
0.05	4	2	0.0270109
0.05	4	2	0.108739
0.05	4	2	0.0830543
0.05	4	2	0.0911522
0.05	4	2	0.0101413
0.05	4	2	0.0126087
0.05	4	2	0.0338152
0.05	4	2	0.029087
0.05	4	2	0.00954348
0.05	4	2	0.0298043
0.05	4	2	0.0893696
0.05	4	2	0.0360435
0.05	4	2	0.110217
0.05	4	2	0.0851413
0.05	4	2	0.0437065
0.05	4	2	0.0599783
0.05	4	2	0.120924
0.05	4	2	0.10325
0.05	4	2	0.0170761
0.05	4	2	0.0662065
0.05	4	2	0.0516957
0.05	4	2	0.145424
0.05	4	2	0.0302826
0.05	4	2	0.0710652
0.05	4	2	0.093087
0.05	4	2	0.0738696
0.05	4	2	0.0258587
0.05	4	2	0.0380109
0.05	4	2	0.0238478
0.05	4	2	0.0184239
0.05	4	2	0.0205109
0.05	4	2	0.0271304
0.05	4	2	0.0568152
0.05	4	2	0.13375
0.05	4	2	0.0563261
0.05	4	2	0.0562609
0.05	4	2	0.157261
0.05	4	2	0.10075
0.05	4	2	0.157652
0.05	4	2	0.0738804
0.05	4	2	0.067163
0.05	4	2	0.0355543
0.05	4	2	0.0457609
0.05	4	2	0.0557717
0.05	4	2	0.03925
0.05	4	2	0.04325
0.05	4	2	0.0335326
0.05	4	2	0.041663
0.05	4	2	0.0210109
0.05	4	2	0.0458152
0.05	4	2	0.053337
0.05	4	2	0.0514783
0.05	4	2	0.046913
0.05	4	2	0.0320978
0.05	4	2	0.0591196
0.05	4	2	0.0190543
0.05	4	2	0.0334348
0.05	4	2	0.0709674
0.05	4	2	0.118033
0.05	4	2	0.0320761
0.05	4	2	0.0813804
0.05	4	2	0.0819565
0.05	4	2	0.113826
0.05	4	2	0.0777283
0.05	4	2	0.18437
0.05	4	2	0.0531196
0.05	4	2	0.0504348
0.05	4	2	0.0853261
0.05	4	2	0.0105
0.05	4	2	0.0880109
0.05	4	2	0.0267717
0.05	4	2	0.0647609
0.05	4	2	0.0278913
0.05	4	2	0.0437174
0.05	4	2	0.04975
0.05	4	2	0.0332935
0.05	4	2	0.0421413
0.05	4	2	0.0687065
0.05	4	2	0.00965217
0.05	4	2	0.0450978
0.05	4	2	0.150717
0.05	4	2	0.107413
0.05	4	2	0.0391304
0.05	4	2	0.0547826
0.05	4	2	0.0563152
0.05	4	2	0.054087
0.05	4	2	0.0539674
0.05	4	2	0.0100761
0.05	4	2	0.0820435
0.05	4	2	0.0999674
0.05	4	2	0.0769457
0.05	4	2	0.059337
0.05	4	2	0.0878696
0.05	4	2	0.0968587
0.05	4	2	0.0454783
0.05	4	2	0.119076
0.05	4	2	0.0308696
0.05	4	2	0.043413
0.05	4	2	0.0853696
0.05	4	2	0.0435652
0.05	4	2	0.0202174
0.05	4	2	0.0102935
0.05	4	2	0.0434783
0.05	4	2	0.13338
0.05	4	2	0.0881196
0.05	4	2	0.0478804
0.05	4	2	0.07075
0.05	4	2	0.0219783
0.05	4	2	0.0776304
0.05	4	2	0.0967717
0.05	4	2	0.10688
0.05	4	2	0.154304
0.05	4	2	0.0603043
0.05	4	2	0.0521848
0.05	4	2	0.0498913
0.05	4	2	0.0907717
0.05	4	2	0.0488478
0.05	4	2	0.029913
0.05	4	2	0.0640978
0.05	4	2	0.0242391
0.05	4	2	0.0325109
0.05	4	2	0.0853804
0.05	4	2	0.0486522
0.05	4	2	0.0381413
0.05	4	2	0.046337
0.05	4	2	0.112837
0.05	4	2	0.0806957
0.05	4	2	0.180141
0.05	4	2	0.0566196
0.05	4	2	0.0537174
0.05	4	2	0.0885109
0.05	4	2	0.0459891
0.05	4	2	0.0675435
0.05	4	2	0.0754348
0.05	4	2	0.140163
0.05	4	2	0.158565
0.05	4	2	0.135837
0.05	4	2	0.111761
0.05	4	2	0.0508478
0.05	4	2	0.0196087
0.05	4	2	0.0521522
0.05	4	2	0.0530435
0.05	4	2	0.082663
0.05	4	2	0.0358913
0.05	4	2	0.0727826
0.05	4	2	0.0439457
0.05	4	2	0.0561196
0.05	4	2	0.0276957
0.05	4	2	0.035413
0.05	4	2	0.0401848
0.05	4	2	0.110391
0.05	4	2	0.14213
0.05	4	2	0.0331196
0.05	4	2	0.0804783
0.05	4	2	0.166239
0.05	4	2	0.0718478
0.05	4	2	0.0825
0.05	4	2	0.0435543
0.05	4	2	0.0933043
0.05	4	2	0.140543
0.05	4	2	0.0521957
0.05	4	2	0.0251087
0.05	4	2	0.0268913
0.05	4	2	0.035913
0.05	4	2	0.0708152
0.05	4	2	0.0274457
0.05	4	2	0.0428152
0.05	4	2	0.00726087
0.05	4	2	0.02125
0.05	4	2	0.0308152
0.05	4	2	0.0592065
0.05	4	2	0.0867935
0.05	4	2	0.0188587
0.05	4	2	0.116217
0.05	4	2	0.14188
0.05	4	2	0.069663
0.05	4	2	0.0540761
0.05	4	2	0.0556522
0.05	4	2	0.0978478
0.05	4	2	0.0343152
0.05	4	2	0.0508804
0.05	4	2	0.0787935
0.05	4	2	0.0655978
0.05	4	2	0.097663
0.05	4	2	0.0661196
0.05	4	2	0.0408478
0.05	4	2	0.0785761
0.05	4	2	0.0682391
0.05	4	2	0.0668152
0.05	4	2	0.0200761
0.05	4	2	0.0333478
0.05	4	2	0.0753261
0.05	4	2	0.0838261
0.05	4	2	0.109239
0.05	4	2	0.0387065
0.05	4	2	0.177489
0.05	4	2	0.0716739
0.05	4	2	0.0609348
0.05	4	2	0.0892717
0.05	4	2	0.0490652
0.05	4	2	0.0644457
0.05	4	2	0.0485
0.05	4	2	0.0591087
0.05	4	2	0.084663
0.05	4	2	0.0554783
0.05	4	2	0.0822826
0.05	4	2	0.0680978
0.05	4	2	0.0593804
0.05	4	2	0.0788478
0.05	4	2	0.0929022
0.05	4	2	0.0354239
0.05	4	2	0.04125
0.05	4	2	0.0811522
0.05	4	2	0.0596087
0.05	4	2	0.0368913
0.05	4	2	0.0409239
0.05	4	2	0.0307174
0.05	4	2	0.0329891
0.05	4	2	0.0294891
0.05	4	2	0.0559348
0.05	4	2	0.0310435
0.05	4	2	0.111435
0.05	4	2	0.146543
0.05	4	2	0.0575
0.05	4	2	0.0597935
0.05	4	2	0.0633696
0.05	4	2	0.13187
0.05	4	2	0.11788
0.05	4	2	0.0687826
0.05	4	2	0.0855652
0.05	4	2	0.0869457
0.05	4	2	0.115663
0.05	4	2	0.0662174
0.05	4	2	0.0638043
0.05	4	2	0.0532065
0.05	4	2	0.115152
0.05	4	2	0.0437826
0.05	4	2	0.125891
0.05	4	2	0.0465217
0.05	4	2	0.0311304
0.05	4	3	0.0806196
0.05	4	3	0.072913
0.05	4	3	0.231663
0.05	4	3	0.099087
0.05	4	3	0.150543
0.05	4	3	0.0899674
0.05	4	3	0.305696
0.05	4	3	0.282533
0.05	4	3	0.294554
0.05	4	3	0.102413
0.05	4	3	0.110076
0.05	4	3	0.143076
0.05	4	3	0.150859
0.05	4	3	0.0420652
0.05	4	3	0.157424
0.05	4	3	0.106978
0.05	4	3	0.220587
0.05	4	3	0.0501196
0.05	4	3	0.163663
0.05	4	3	0.262478
0.05	4	3	0.155043
0.05	4	3	0.179685
0.05	4	3	0.0868587
0.05	4	3	0.09125
0.05	4	3	0.0318261
0.05	4	3	0.0306413
0.05	4	3	0.071413
0.05	4	3	0.0833913
0.05	4	3	0.0739783
0.05	4	3	0.0507826
0.05	4	3	0.0297826
0.05	4	3	0.269174
0.05	4	3	0.057587
0.05	4	3	0.188924
0.05	4	3	0.272696
0.05	4	3	0.158043
0.05	4	3	0.137228
0.05	4	3	0.149207
0.05	4	3	0.25925
0.05	4	3	0.137402
0.05	4	3	0.0944783
0.05	4	3	0.0498152
0.05	4	3	0.0481304
0.05	4	3	0.30763
0.05	4	3	0.31
0.05	4	3	0.0656087
0.05	4	3	0.0469891
0.05	4	3	0.0357174
0.05	4	3	0.0340761
0.05	4	3	0.0364674
0.05	4	3	0.0411522
0.05	4	3	0.0687065
0.05	4	3	0.118054
0.05	4	3	0.0414348
0.05	4	3	0.0348913
0.05	4	3	0.019587
0.05	4	3	0.0781739
0.05	4	3	0.205783
0.05	4	3	0.188359
0.05	4	3	0.0711413
0.05	4	3	0.0501413
0.05	4	3	0.120772
0.05	4	3	0.219054
0.05	4	3	0.152109
0.05	4	3	0.146533
0.05	4	3	0.0356087
0.05	4	3	0.0592826
0.05	4	3	0.0971739
0.05	4	3	0.067163
0.05	4	3	0.0695326
0.05	4	3	0.126098
0.05	4	3	0.196957
0.05	4	3	0.0532391
0.05	4	3	0.0451413
0.05	4	3	0.145696
0.05	4	3	0.159641
0.05	4	3	0.0572283
0.05	4	3	0.244011
0.05	4	3	0.271652
0.05	4	3	0.101326
0.05	4	3	0.216152
0.05	4	3	0.139565
0.05	4	3	0.249141
0.05	4	3	0.155011
0.05	4	3	0.0849674
0.05	4	3	0.0507609
0.05	4	3	0.256826
0.05	4	3	0.0481957
0.05	4	3	0.0787174
0.05	4	3	0.164065
0.05	4	3	0.110826
0.05	4	3	0.0813478
0.05	4	3	0.145293
0.05	4	3	0.126065
0.05	4	3	0.191304
0.05	4	3	0.04375
0.05	4	3	0.0582283
0.05	4	3	0.0640109
0.05	4	3	0.0663696
0.05	4	3	0.04175
0.05	4	3	0.141543
0.05	4	3	0.100674
0.05	4	3	0.08125
0.05	4	3	0.11737
0.05	4	3	0.0697065
0.05	4	3	0.164239
0.05	4	3	0.156598
0.05	4	3	0.274457
0.05	4	3	0.208554
0.05	4	3	0.187272
0.05	4	3	0.148424
0.05	4	3	0.108935
0.05	4	3	0.048913
0.05	4	3	0.0605543
0.05	4	3	0.102043
0.05	4	3	0.0305
0.05	4	3	0.0596304
0.05	4	3	0.0309565
0.05	4	3	0.0407609
0.05	4	3	0.0744239
0.05	4	3	0.0360109
0.05	4	3	0.0165435
0.05	4	3	0.0997717
0.05	4	3	0.02675
0.05	4	3	0.132717
0.05	4	3	0.122728
0.05	4	3	0.167457
0.05	4	3	0.0873696
0.05	4	3	0.0700978
0.05	4	3	0.12513
0.05	4	3	0.0824674
0.05	4	3	0.0207065
0.05	4	3	0.0977065
0.05	4	3	0.100674
0.05	4	3	0.0660435
0.05	4	3	0.126576
0.05	4	3	0.165065
0.05	4	3	0.123946
0.05	4	3	0.0943587
0.05	4	3	0.0602391
0.05	4	3	0.181435
0.05	4	3	0.0456304
0.05	4	3	0.0713913
0.05	4	3	0.231554
0.05	4	3	0.0963587
0.05	4	3	0.0169239
0.05	4	3	0.253783
0.05	4	3	0.199891
0.05	4	3	0.0267065
0.05	4	3	0.10688
0.05	4	3	0.0858913
0.05	4	3	0.0608152
0.05	4	3	0.130848
0.05	4	3	0.146554
0.05	4	3	0.156304
0.05	4	3	0.143707
0.05	4	3	0.277
0.05	4	3	0.106424
0.05	4	3	0.039
0.05	4	3	0.0599891
0.05	4	3	0.0457609
0.05	4	3	0.132239
0.05	4	3	0.13862
0.05	4	3	0.0728913
0.05	4	3	0.0922174
0.05	4	3	0.0733804
0.05	4	3	0.0465435
0.05	4	3	0.114761
0.05	4	3	0.10012
0.05	4	3	0.0778478
0.05	4	3	0.236283
0.05	4	3	0.115826
0.05	4	3	0.20912
0.05	4	3	0.148598
0.05	4	3	0.118826
0.05	4	3	0.268978
0.05	4	3	0.163696
0.05	4	3	0.0579348
0.05	4	3	0.156728
0.05	4	3	0.222467
0.05	4	3	0.163663
0.05	4	3	0.0948261
0.05	4	3	0.196717
0.05	4	3	0.0524457
0.05	4	3	0.106804
0.05	4	3	0.0925109
0.05	4	3	0.0812391
0.05	4	3	0.103533
0.05	4	3	0.124478
0.05	4	3	0.0510761
0.05	4	3	0.145141
0.05	4	3	0.0582065
0.05	4	3	0.0269783
0.05	4	3	0.0691957
0.05	4	3	0.0110761
0.05	4	3	0.0209348
0.05	4	3	0.157793
0.05	4	3	0.137935
0.05	4	3	0.0325761
0.05	4	3	0.0873696
0.05	4	3	0.117228
0.05	4	3	0.0662283
0.05	4	3	0.118272
0.05	4	3	0.0784783
0.05	4	3	0.0818804
0.05	4	3	0.0558587
0.05	4	3	0.0720543
0.05	4	3	0.234163
0.05	4	3	0.154413
0.05	4	3	0.0375435
0.05	4	3	0.130739
0.05	4	3	0.0470761
0.05	4	3	0.0517174
0.05	4	3	0.0763478
0.05	4	3	0.0534457
0.05	4	3	0.16375
0.05	4	3	0.0427283
0.05	4	3	0.159033
0.05	4	3	0.102913
0.05	4	3	0.0711196
0.05	4	3	0.0633804
0.05	4	3	0.154946
0.05	4	3	0.200576
0.05	4	3	0.15487
0.05	4	3	0.206065
0.05	4	3	0.0158261
0.05	4	3	0.0417717
0.05	4	3	0.0612283
0.05	4	3	0.065337
0.05	4	3	0.19263
0.05	4	3	0.14775
0.05	4	3	0.271663
0.05	4	3	0.0966739
0.05	4	3	0.0488587
0.05	4	3	0.0965326
0.05	4	3	0.183565
0.05	4	3	0.176391
0.05	4	3	0.1
0.05	4	3	0.114783
0.05	4	3	0.221804
0.05	4	3	0.0737935
0.05	4	3	0.115185
0.05	4	3	0.235446
0.05	4	3	0.0677065
0.05	4	3	0.0634674
0.05	4	3	0.094663
0.05	4	3	0.203217
0.05	4	3	0.102033
0.05	4	3	0.193772
0.05	4	3	0.0451413
0.05	4	3	0.131728
0.05	4	3	0.112565
0.05	4	3	0.0805217
0.05	4	3	0.0146413
0.05	4	3	0.015587
0.05	4	3	0.0443913
0.05	4	3	0.0390652
0.05	4	3	0.0732935
0.05	4	3	0.0453913
0.05	4	3	0.0748696
0.05	4	3	0.0564239
0.05	4	3	0.0218696
0.05	4	3	0.115554
0.05	4	3	0.154478
0.05	4	3	0.0354348
0.05	4	3	0.238837
0.05	4	3	0.0520978
0.05	4	3	0.075587
0.05	4	3	0.106076
0.05	4	3	0.13287
0.05	4	3	0.125685
0.05	4	3	0.0841739
0.05	4	3	0.0831957
0.05	4	3	0.0748043
0.05	4	3	0.160217
0.05	4	3	0.140891
0.05	4	3	0.0251522
0.05	4	3	0.0285326
0.05	4	3	0.152261
0.05	4	3	0.305217
0.05	4	3	0.12337
0.05	4	3	0.0369891
0.05	4	3	0.0541522
0.05	4	3	0.0288696
0.05	4	3	0.0305652
0.05	4	3	0.199076
0.05	4	3	0.104598
0.05	4	3	0.146348
0.05	4	3	0.156435
0.05	4	3	0.173098
0.05	4	3	0.235957
0.05	4	3	0.0143913
0.05	4	3	0.053663
0.05	4	3	0.0763913
0.05	4	3	0.129348
0.05	4	3	0.0405217
0.05	4	3	0.154196
0.05	4	3	0.151848
0.05	4	3	0.065837
0.05	4	3	0.226522
0.05	4	3	0.244663
0.05	4	3	0.154967
0.05	4	3	0.113554
0.05	4	3	0.242891
0.05	4	4	0.187989
0.05	4	4	0.138783
0.05	4	4	0.119783
0.05	4	4	0.178065
0.05	4	4	0.202011
0.05	4	4	0.104772
0.05	4	4	0.178739
0.05	4	4	0.110272
0.05	4	4	0.124761
0.05	4	4	0.0855978
0.05	4	4	0.0483804
0.05	4	4	0.0804783
0.05	4	4	0.037837
0.05	4	4	0.0632826
0.05	4	4	0.106196
0.05	4	4	0.0393152
0.05	4	4	0.0560326
0.05	4	4	0.0116196
0.05	4	4	0.19013
0.05	4	4	0.0777717
0.05	4	4	0.0296957
0.05	4	4	0.0245652
0.05	4	4	0.126696
0.05	4	4	0.19263
0.05	4	4	0.0823152
0.05	4	4	0.197772
0.05	4	4	0.0818261
0.05	4	4	0.0714565
0.05	4	4	0.20063
0.05	4	4	0.202011
0.05	4	4	0.252348
0.05	4	4	0.16613
0.05	4	4	0.0213043
0.05	4	4	0.0877935
0.05	4	4	0.0915761
0.05	4	4	0.0764674
0.05	4	4	0.1865
0.05	4	4	0.0651739
0.05	4	4	0.0901957
0.05	4	4	0.0769348
0.05	4	4	0.056087
0.05	4	4	0.121457
0.05	4	4	0.064337
0.05	4	4	0.134891
0.05	4	4	0.0996522
0.05	4	4	0.0240978
0.05	4	4	0.137848
0.05	4	4	0.125543
0.05	4	4	0.321913
0.05	4	4	0.218152
0.05	4	4	0.155011
0.05	4	4	0.0862609
0.05	4	4	0.0832283
0.05	4	4	0.0672717
0.05	4	4	0.241293
0.05	4	4	0.0697717
0.05	4	4	0.0396413
0.05	4	4	0.242457
0.05	4	4	0.115946
0.05	4	4	0.144391
0.05	4	4	0.126033
0.05	4	4	0.083
0.05	4	4	0.0941304
0.05	4	4	0.0800543
0.05	4	4	0.137793
0.05	4	4	0.129859
0.05	4	4	0.103239
0.05	4	4	0.201446
0.05	4	4	0.166174
0.05	4	4	0.0273587
0.05	4	4	0.0472391
0.05	4	4	0.0549783
0.05	4	4	0.0760652
0.05	4	4	0.069913
0.05	4	4	0.284554
0.05	4	4	0.21463
0.05	4	4	0.0262283
0.05	4	4	0.219913
0.05	4	4	0.187109
0.05	4	4	0.122489
0.05	4	4	0.163826
0.05	4	4	0.151804
0.05	4	4	0.043913
0.05	4	4	0.15113
0.05	4	4	0.0526087
0.05	4	4	0.108859
0.05	4	4	0.136674
0.05	4	4	0.0961196
0.05	4	4	0.168761
0.05	4	4	0.03175
0.05	4	4	0.15288
0.05	4	4	0.0569674
0.05	4	4	0.195
0.05	4	4	0.192761
0.05	4	4	0.0427391
0.05	4	4	0.215935
0.05	4	4	0.2315
0.05	4	4	0.0940652
0.05	4	4	0.0486087
0.05	4	4	0.245913
0.05	4	4	0.296446
0.05	4	4	0.0434783
0.05	4	4	0.179772
0.05	4	4	0.178272
0.05	4	4	0.0380761
0.05	4	4	0.0351522
0.05	4	4	0.0263913
0.05	4	4	0.0435109
0.05	4	4	0.128043
0.05	4	4	0.119
0.05	4	4	0.0377174
0.05	4	4	0.0276739
0.05	4	4	0.110239
0.05	4	4	0.152337
0.05	4	4	0.190043
0.05	4	4	0.109957
0.05	4	4	0.176261
0.05	4	4	0.221783
0.05	4	4	0.057913
0.05	4	4	0.0630435
0.05	4	4	0.108283
0.05	4	4	0.170957
0.05	4	4	0.216141
0.05	4	4	0.136793
0.05	4	4	0.05825
0.05	4	4	0.107174
0.05	4	4	0.103337
0.05	4	4	0.0659783
0.05	4	4	0.022913
0.05	4	4	0.150326
0.05	4	4	0.145641
0.05	4	4	0.138457
0.05	4	4	0.208913
0.05	4	4	0.185467
0.05	4	4	0.0920217
0.05	4	4	0.139793
0.05	4	4	0.12725
0.05	4	4	0.173109
0.05	4	4	0.283163
0.05	4	4	0.180935
0.05	4	4	0.0198913
0.05	4	4	0.2285
0.05	4	4	0.271054
0.05	4	4	0.213163
0.05	4	4	0.187315
0.05	4	4	0.100652
0.05	4	4	0.204315
0.05	4	4	0.18325
0.05	4	4	0.273902
0.05	4	4	0.20175
0.05	4	4	0.0968804
0.05	4	4	0.190109
0.05	4	4	0.170652
0.05	4	4	0.266228
0.05	4	4	0.0182391
0.05	4	4	0.0421848
0.05	4	4	0.029413
0.05	4	4	0.0209348
0.05	4	4	0.0331522
0.05	4	4	0.286641
0.05	4	4	0.134674
0.05	4	4	0.184141
0.05	4	4	0.25137
0.05	4	4	0.0709239
0.05	4	4	0.0561957
0.05	4	4	0.0425109
0.05	4	4	0.0412065
0.05	4	4	0.250076
0.05	4	4	0.350696
0.05	4	4	0.0568913
0.05	4	4	0.0995652
0.05	4	4	0.155446
0.05	4	4	0.101467
0.05	4	4	0.145663
0.05	4	4	0.0649783
0.05	4	4	0.038587
0.05	4	4	0.176446
0.05	4	4	0.151196
0.05	4	4	0.0933804
0.05	4	4	0.0512717
0.05	4	4	0.0580217
0.05	4	4	0.0972826
0.05	4	4	0.146587
0.05	4	4	0.179924
0.05	4	4	0.193707
0.05	4	4	0.23587
0.05	4	4	0.243261
0.05	4	4	0.147054
0.05	4	4	0.0981304
0.05	4	4	0.217348
0.05	4	4	0.264511
0.05	4	4	0.0412391
0.05	4	4	0.220598
0.05	4	4	0.349576
0.05	4	4	0.0349239
0.05	4	4	0.0561522
0.05	4	4	0.291217
0.05	4	4	0.105924
0.05	4	4	0.108391
0.05	4	4	0.0515543
0.05	4	4	0.25175
0.05	4	4	0.0225543
0.05	4	4	0.0340217
0.05	4	4	0.0504239
0.05	4	4	0.024337
0.05	4	4	0.0500109
0.05	4	4	0.0580652
0.05	4	4	0.0642717
0.05	4	4	0.032837
0.05	4	4	0.052337
0.05	4	4	0.0456413
0.05	4	4	0.0665
0.05	4	4	0.103837
0.05	4	4	0.0516522
0.05	4	4	0.0310217
0.05	4	4	0.0252609
0.05	4	4	0.24438
0.05	4	4	0.198598
0.05	4	4	0.115185
0.05	4	4	0.0419674
0.05	4	4	0.0783043
0.05	4	4	0.0936304
0.05	4	4	0.129424
0.05	4	4	0.145652
0.05	4	4	0.109065
0.05	4	4	0.0740109
0.05	4	4	0.0681848
0.05	4	4	0.0508913
0.05	4	4	0.0652935
0.05	4	4	0.0991957
0.05	4	4	0.0392717
0.05	4	4	0.0705217
0.05	4	4	0.010913
0.05	4	4	0.0587717
0.05	4	4	0.0395435
0.05	4	4	0.0379783
0.05	4	4	0.0800652
0.05	4	4	0.0662174
0.05	4	4	0.04825
0.05	4	4	0.0365109
0.05	4	4	0.0251087
0.05	4	4	0.126413
0.05	4	4	0.163576
0.05	4	4	0.0602391
0.05	4	4	0.0748696
0.05	4	4	0.108707
0.05	4	4	0.016837
0.05	4	4	0.138065
0.05	4	4	0.0709891
0.05	4	4	0.191478
0.05	4	4	0.0346087
0.05	4	4	0.0908043
0.05	4	4	0.19287
0.05	4	4	0.222207
0.05	4	4	0.0422283
0.05	4	4	0.149565
0.05	4	4	0.0451739
0.05	4	4	0.189489
0.05	4	4	0.16262
0.05	4	4	0.106087
0.05	4	4	0.0842065
0.05	4	4	0.0920761
0.05	4	4	0.0487283
0.05	4	4	0.0922609
0.05	4	4	0.0417826
0.05	4	4	0.0197065
0.05	8	0.5	0.0444891
0.05	8	0.5	0.00847826
0.05	8	0.5	0.0109022
0.05	8	0.5	0.0108696
0.05	8	0.5	0.0238696
0.05	8	0.5	0.00841304
0.05	8	0.5	0.0280217
0.05	8	0.5	0.00642391
0.05	8	0.5	0.0152935
0.05	8	0.5	0.0197935
0.05	8	0.5	0.0104239
0.05	8	0.5	0.011413
0.05	8	0.5	0.0108696
0.05	8	0.5	0.0142391
0.05	8	0.5	0.00520652
0.05	8	0.5	0.00980435
0.05	8	0.5	0.0106087
0.05	8	0.5	0.0342283
0.05	8	0.5	0.0439783
0.05	8	0.5	0.031163
0.05	8	0.5	0.00932609
0.05	8	0.5	0.0106196
0.05	8	0.5	0.0255761
0.05	8	0.5	0.008
0.05	8	0.5	0.0489022
0.05	8	0.5	0.0289239
0.05	8	0.5	0.0120543
0.05	8	0.5	0.00813043
0.05	8	0.5	0.0141739
0.05	8	0.5	0.00841304
0.05	8	0.5	0.0333804
0.05	8	0.5	0.0292065
0.05	8	0.5	0.0136848
0.05	8	0.5	0.0147826
0.05	8	0.5	0.0123478
0.05	8	0.5	0.0189674
0.05	8	0.5	0.0104457
0.05	8	0.5	0.0177609
0.05	8	0.5	0.0330761
0.05	8	0.5	0.00827174
0.05	8	0.5	0.0165435
0.05	8	0.5	0.00815217
0.05	8	0.5	0.0111413
0.05	8	0.5	0.00828261
0.05	8	0.5	0.00926087
0.05	8	0.5	0.0172174
0.05	8	0.5	0.0186848
0.05	8	0.5	0.0204674
0.05	8	0.5	0.0186957
0.05	8	0.5	0.0214891
0.05	8	0.5	0.0334348
0.05	8	0.5	0.0440978
0.05	8	0.5	0.0186957
0.05	8	0.5	0.013087
0.05	8	0.5	0.00980435
0.05	8	0.5	0.01325
0.05	8	0.5	0.0400761
0.05	8	0.5	0.0447609
0.05	8	0.5	0.0186739
0.05	8	0.5	0.00353261
0.05	8	0.5	0.0076087
0.05	8	0.5	0.0254565
0.05	8	0.5	0.0203043
0.05	8	0.5	0.014337
0.05	8	0.5	0.018
0.05	8	0.5	0.0117174
0.05	8	0.5	0.0216196
0.05	8	0.5	0.0183478
0.05	8	0.5	0.0247283
0.05	8	0.5	0.00884783
0.05	8	0.5	0.0276522
0.05	8	0.5	0.030837
0.05	8	0.5	0.0127174
0.05	8	0.5	0.0112935
0.05	8	0.5	0.0165217
0.05	8	0.5	0.023413
0.05	8	0.5	0.0232391
0.05	8	0.5	0.0170435
0.05	8	0.5	0.0124022
0.05	8	0.5	0.00282609
0.05	8	0.5	0.00953261
0.05	8	0.5	0.0191739
0.05	8	0.5	0.0281957
0.05	8	0.5	0.0222065
0.05	8	0.5	0.011087
0.05	8	0.5	0.0140978
0.05	8	0.5	0.0209457
0.05	8	0.5	0.0117391
0.05	8	0.5	0.00505435
0.05	8	0.5	0.0134022
0.05	8	0.5	0.0261196
0.05	8	0.5	0.0449239
0.05	8	0.5	0.0119239
0.05	8	0.5	0.0136739
0.05	8	0.5	0.0213913
0.05	8	0.5	0.0300978
0.05	8	0.5	0.0389674
0.05	8	0.5	0.0100652
0.05	8	0.5	0.0096413
0.05	8	0.5	0.0192935
0.05	8	0.5	0.0172717
0.05	8	0.5	0.00401087
0.05	8	0.5	0.0214674
0.05	8	0.5	0.0138696
0.05	8	0.5	0.0320652
0.05	8	0.5	0.0183587
0.05	8	0.5	0.0124674
0.05	8	0.5	0.0303043
0.05	8	0.5	0.0186957
0.05	8	0.5	0.0165543
0.05	8	0.5	0.0143152
0.05	8	0.5	0.0180326
0.05	8	0.5	0.0130543
0.05	8	0.5	0.00805435
0.05	8	0.5	0.0108587
0.05	8	0.5	0.00872826
0.05	8	0.5	0.0147609
0.05	8	0.5	0.0117065
0.05	8	0.5	0.01
0.05	8	0.5	0.0133804
0.05	8	0.5	0.00970652
0.05	8	0.5	0.0141739
0.05	8	0.5	0.0145109
0.05	8	0.5	0.00918478
0.05	8	0.5	0.0218696
0.05	8	0.5	0.028087
0.05	8	0.5	0.0159022
0.05	8	0.5	0.0206848
0.05	8	0.5	0.024913
0.05	8	0.5	0.0136087
0.05	8	0.5	0.0126196
0.05	8	0.5	0.0222174
0.05	8	0.5	0.0306848
0.05	8	0.5	0.0144348
0.05	8	0.5	0.00377174
0.05	8	0.5	0.020837
0.05	8	0.5	0.0288913
0.05	8	0.5	0.0187826
0.05	8	0.5	0.0328804
0.05	8	0.5	0.0335652
0.05	8	0.5	0.00944565
0.05	8	0.5	0.0176522
0.05	8	0.5	0.00902174
0.05	8	0.5	0.0162935
0.05	8	0.5	0.0132717
0.05	8	0.5	0.0121848
0.05	8	0.5	0.00679348
0.05	8	0.5	0.0109565
0.05	8	0.5	0.0129674
0.05	8	0.5	0.0124457
0.05	8	0.5	0.0186739
0.05	8	0.5	0.00634783
0.05	8	0.5	0.00754348
0.05	8	0.5	0.0193804
0.05	8	0.5	0.0125109
0.05	8	0.5	0.0247283
0.05	8	0.5	0.0209022
0.05	8	0.5	0.012337
0.05	8	0.5	0.0196957
0.05	8	0.5	0.00495652
0.05	8	0.5	0.0163804
0.05	8	0.5	0.0199891
0.05	8	0.5	0.024587
0.05	8	0.5	0.0348804
0.05	8	0.5	0.0256522
0.05	8	0.5	0.0142283
0.05	8	0.5	0.00826087
0.05	8	0.5	0.00496739
0.05	8	0.5	0.0250326
0.05	8	0.5	0.0167065
0.05	8	0.5	0.0302826
0.05	8	0.5	0.0216304
0.05	8	0.5	0.0140109
0.05	8	0.5	0.0244783
0.05	8	0.5	0.0098913
0.05	8	0.5	0.0206957
0.05	8	0.5	0.0173587
0.05	8	0.5	0.0155109
0.05	8	0.5	0.0285435
0.05	8	0.5	0.0230109
0.05	8	0.5	0.016337
0.05	8	0.5	0.0323587
0.05	8	0.5	0.026913
0.05	8	0.5	0.0328804
0.05	8	0.5	0.0138913
0.05	8	0.5	0.00901087
0.05	8	0.5	0.0214783
0.05	8	0.5	0.0126848
0.05	8	0.5	0.0191957
0.05	8	0.5	0.00655435
0.05	8	0.5	0.0117391
0.05	8	0.5	0.0243913
0.05	8	0.5	0.00983696
0.05	8	0.5	0.0230326
0.05	8	0.5	0.0108587
0.05	8	0.5	0.00683696
0.05	8	0.5	0.00623913
0.05	8	0.5	0.0169891
0.05	8	0.5	0.0176848
0.05	8	0.5	0.00883696
0.05	8	0.5	0.0182609
0.05	8	0.5	0.0061413
0.05	8	0.5	0.0180543
0.05	8	0.5	0.0355109
0.05	8	0.5	0.0284783
0.05	8	0.5	0.00917391
0.05	8	0.5	0.0125435
0.05	8	0.5	0.0357935
0.05	8	0.5	0.0195217
0.05	8	0.5	0.00923913
0.05	8	0.5	0.0119891
0.05	8	0.5	0.00736957
0.05	8	0.5	0.00970652
0.05	8	0.5	0.00318478
0.05	8	0.5	0.0246304
0.05	8	0.5	0.0194783
0.05	8	0.5	0.0096413
0.05	8	0.5	0.0132174
0.05	8	0.5	0.0130652
0.05	8	0.5	0.021337
0.05	8	0.5	0.0320217
0.05	8	0.5	0.00857609
0.05	8	0.5	0.0261739
0.05	8	0.5	0.0281522
0.05	8	0.5	0.0115
0.05	8	0.5	0.0299348
0.05	8	0.5	0.0308152
0.05	8	0.5	0.0155978
0.05	8	0.5	0.0198804
0.05	8	0.5	0.0282283
0.05	8	0.5	0.0150109
0.05	8	0.5	0.00803261
0.05	8	0.5	0.0104348
0.05	8	0.5	0.0107283
0.05	8	0.5	0.009
0.05	8	0.5	0.0110652
0.05	8	0.5	0.0156848
0.05	8	0.5	0.0162391
0.05	8	0.5	0.0202391
0.05	8	0.5	0.00827174
0.05	8	0.5	0.0165761
0.05	8	0.5	0.0101848
0.05	8	0.5	0.0274239
0.05	8	0.5	0.01975
0.05	8	0.5	0.0113804
0.05	8	0.5	0.0190652
0.05	8	0.5	0.03225
0.05	8	0.5	0.00392391
0.05	8	0.5	0.0356739
0.05	8	0.5	0.028087
0.05	8	0.5	0.0091087
0.05	8	0.5	0.034663
0.05	8	0.5	0.0245543
0.05	8	0.5	0.0159457
0.05	8	0.5	0.020163
0.05	8	0.5	0.0113696
0.05	8	0.5	0.00478261
0.05	8	0.5	0.0133696
0.05	8	0.5	0.01075
0.05	8	0.5	0.0156522
0.05	8	0.5	0.02425
0.05	8	0.5	0.0355326
0.05	8	0.5	0.0275326
0.05	8	0.5	0.00873913
0.05	8	0.5	0.0138913
0.05	8	0.5	0.0046087
0.05	8	0.5	0.0227609
0.05	8	0.5	0.0103696
0.05	8	0.5	0.0182174
0.05	8	0.5	0.0196087
0.05	8	0.5	0.0171957
0.05	8	0.5	0.0286957
0.05	8	0.5	0.0125652
0.05	8	0.5	0.0104348
0.05	8	0.5	0.0121957
0.05	8	0.5	0.0140978
0.05	8	0.5	0.0197065
0.05	8	0.5	0.0178261
0.05	8	0.5	0.021837
0.05	8	0.5	0.0208043
0.05	8	0.5	0.0195761
0.05	8	0.5	0.052
0.05	8	0.5	0.0351196
0.05	8	0.5	0.0170978
0.05	8	0.5	0.00794565
0.05	8	0.5	0.0192283
0.05	8	0.5	0.0223913
0.05	8	0.5	0.0221739
0.05	8	0.5	0.0289348
0.05	8	0.5	0.0167826
0.05	8	0.5	0.0135761
0.05	8	0.5	0.0127283
0.05	8	0.5	0.0136087
0.05	8	0.5	0.0119783
0.05	8	0.5	0.0488043
0.05	8	0.5	0.0401739
0.05	8	0.5	0.0320978
0.05	8	0.5	0.02425
0.05	8	0.5	0.0101087
0.05	8	0.5	0.00755435
0.05	8	0.5	0.0120652
0.05	8	0.5	0.00652174
0.05	8	0.5	0.0071413
0.05	8	0.5	0.0130978
0.05	8	0.5	0.013
0.05	8	0.5	0.0130217
0.05	8	0.5	0.0120761
0.05	8	0.5	0.0146957
0.05	8	0.5	0.0160761
0.05	8	0.5	0.0185109
0.05	8	0.5	0.013
0.05	8	0.5	0.0230435
0.05	8	0.5	0.0336087
0.05	8	0.5	0.0228696
0.05	8	0.5	0.0143913
0.05	8	0.5	0.031087
0.05	8	0.5	0.00848913
0.05	8	0.5	0.012087
0.05	8	0.5	0.0346304
0.05	8	0.5	0.00515217
0.05	8	0.5	0.0258478
0.05	8	0.5	0.0181957
0.05	8	0.5	0.0275652
0.05	8	0.5	0.00936957
0.05	8	0.5	0.0195217
0.05	8	0.5	0.0135435
0.05	8	0.5	0.017163
0.05	8	0.5	0.00711957
0.05	8	0.5	0.0222609
0.05	8	0.5	0.012587
0.05	8	0.5	0.00763043
0.05	8	0.5	0.00745652
0.05	8	0.5	0.0125761
0.05	8	0.5	0.0274239
0.05	8	0.5	0.0160435
0.05	8	0.5	0.0376087
0.05	8	0.5	0.00708696
0.05	8	0.5	0.0501196
0.05	8	0.5	0.02
0.05	8	0.5	0.00905435
0.05	8	0.5	0.0308043
0.05	8	0.5	0.0319565
0.05	8	0.5	0.00704348
0.05	8	0.5	0.0076413
0.05	8	0.5	0.00578261
0.05	8	0.5	0.00736957
0.05	8	0.5	0.00694565
0.05	8	0.5	0.0156522
0.05	8	0.5	0.0209022
0.05	8	0.5	0.0176522
0.05	8	0.5	0.0188043
0.05	8	0.5	0.0139674
0.05	8	0.5	0.0274783
0.05	8	0.5	0.0191848
0.05	8	0.5	0.0229674
0.05	8	0.5	0.0177391
0.05	8	0.5	0.016587
0.05	8	0.5	0.0404457
0.05	8	0.5	0.0247283
0.05	8	0.5	0.043837
0.05	8	0.5	0.0358696
0.05	8	0.5	0.0095
0.05	8	0.5	0.0281304
0.05	8	0.5	0.0313043
0.05	8	0.5	0.0278587
0.05	8	0.5	0.0098587
0.05	8	0.5	0.0130435
0.05	8	0.5	0.0193261
0.05	8	0.5	0.00917391
0.05	8	0.5	0.00606522
0.05	8	0.5	0.0301739
0.05	8	0.5	0.00957609
0.05	8	0.5	0.0164022
0.05	8	0.5	0.0122283
0.05	8	0.5	0.0246739
0.05	8	0.5	0.0109348
0.05	8	0.5	0.0140109
0.05	8	0.5	0.0208913
0.05	8	0.5	0.012913
0.05	8	0.5	0.0301196
0.05	8	0.5	0.0225543
0.05	8	0.5	0.023087
0.05	8	0.5	0.00752174
0.05	8	0.5	0.0056413
0.05	8	0.5	0.0145435
0.05	8	0.5	0.0255543
0.05	8	0.5	0.0105761
0.05	8	0.5	0.00828261
0.05	8	0.5	0.0158478
0.05	8	0.5	0.00929348
0.05	8	0.5	0.01075
0.05	8	0.5	0.00869565
0.05	8	0.5	0.0102065
0.05	8	0.5	0.0212283
0.05	8	0.5	0.017913
0.05	8	0.5	0.0136848
0.05	8	0.5	0.00740217
0.05	8	0.5	0.0117826
0.05	8	0.5	0.0196413
0.05	8	0.5	0.0218913
0.05	8	0.5	0.00918478
0.05	8	0.5	0.00979348
0.05	8	0.5	0.0174022
0.05	8	0.5	0.012087
0.05	8	0.5	0.00903261
0.05	8	0.5	0.00878261
0.05	8	0.5	0.00683696
0.05	8	0.5	0.0146196
0.05	8	0.5	0.00468478
0.05	8	0.5	0.0113696
0.05	8	0.5	0.0174022
0.05	8	0.5	0.0093913
0.05	8	0.5	0.0111739
0.05	8	0.5	0.0174239
0.05	8	0.5	0.0286739
0.05	8	0.5	0.0325652
0.05	8	0.5	0.0395109
0.05	8	0.5	0.0286848
0.05	8	0.5	0.0318261
0.05	8	0.5	0.0153478
0.05	8	0.5	0.0141848
0.05	8	0.5	0.0282609
0.05	8	0.5	0.0136304
0.05	8	0.5	0.0136196
0.05	8	0.5	0.017837
0.05	8	0.5	0.0209565
0.05	8	0.5	0.0120435
0.05	8	0.5	0.0196087
0.05	8	0.5	0.00468478
0.05	8	0.5	0.0330326
0.05	8	0.5	0.0299348
0.05	8	0.5	0.0189783
0.05	8	0.5	0.0324783
0.05	8	0.5	0.0133152
0.05	8	0.5	0.0185652
0.05	8	0.5	0.00820652
0.05	8	0.5	0.0256739
0.05	8	0.5	0.0126196
0.05	8	0.5	0.040413
0.05	8	0.5	0.0193696
0.05	8	0.5	0.0191413
0.05	8	0.5	0.0123804
0.05	8	0.5	0.0198261
0.05	8	0.5	0.0136413
[truncated: 4,426 more rows]
