# Supplementary material for: Stochastic bond dynamics facilitates alignment of malaria parasite at erythrocyte membrane upon invasion
Source: eLife journal article supplement (doi:10.7554/elife.56500), 2020-05-18
Supplement: fig9-data1 [file Alignment_time.xlsx]

## Sheet: Times_rigid
RBC	KoffOverKonl	Times
Rigid RBC	2	6498
Rigid RBC	2	158049
Rigid RBC	2	71749
Rigid RBC	2	3075
Rigid RBC	2	95535
Rigid RBC	2	78480
Rigid RBC	2	22477
Rigid RBC	2	35977
Rigid RBC	2	69114
Rigid RBC	2	108931
Rigid RBC	2	60143
Rigid RBC	2	51654
Rigid RBC	2	3628
Rigid RBC	2	44261
Rigid RBC	2	11202
Rigid RBC	2	7959
Rigid RBC	2	22477
Rigid RBC	2	20444
Rigid RBC	2	2
Rigid RBC	2	85203
Rigid RBC	2	214551
Rigid RBC	2	3075
Rigid RBC	2	65484
Rigid RBC	2	111185
Rigid RBC	2	47991
Rigid RBC	2	32674
Rigid RBC	2	87641
Rigid RBC	2	117368
Rigid RBC	2	123617
Rigid RBC	2	70306
Rigid RBC	2	85203
Rigid RBC	2	12415
Rigid RBC	2	35762
Rigid RBC	2	108973
Rigid RBC	2	158287
Rigid RBC	2	5586
Rigid RBC	2	382995
Rigid RBC	2	43659
Rigid RBC	2	2
Rigid RBC	2	35609
Rigid RBC	2	24246
Rigid RBC	2	53111
Rigid RBC	2	37453
Rigid RBC	2	158287
Rigid RBC	2	3425
Rigid RBC	2	58571
Rigid RBC	2	125795
Rigid RBC	2	44261
Rigid RBC	2	7019
Rigid RBC	2	108973
Rigid RBC	2	40230
Rigid RBC	2	175735
Rigid RBC	2	166858
Rigid RBC	2	54081
Rigid RBC	2	12276
Rigid RBC	2	16671
Rigid RBC	2	43659
Rigid RBC	2	69114
Rigid RBC	2	6410
Rigid RBC	2	182602
Rigid RBC	2	49773
Rigid RBC	2	213122
Rigid RBC	2	19659
Rigid RBC	2	22640
Rigid RBC	2	21283
Rigid RBC	2	65511
Rigid RBC	2	59656
Rigid RBC	2	136804
Rigid RBC	2	54150
Rigid RBC	2	127218
Rigid RBC	2	59656
Rigid RBC	2	19930
Rigid RBC	2	22235
Rigid RBC	2	285898
Rigid RBC	2	43978
Rigid RBC	2	90438
Rigid RBC	2	56381
Rigid RBC	2	4241
Rigid RBC	2	50627
Rigid RBC	2	35752
Rigid RBC	2	25592
Rigid RBC	2	21386
Rigid RBC	2	42583
Rigid RBC	2	46173
Rigid RBC	2	72989
Rigid RBC	2	22627
Rigid RBC	2	243987
Rigid RBC	2	5120
Rigid RBC	2	9998
Rigid RBC	2	8634
Rigid RBC	2	12464
Rigid RBC	2	27197
Rigid RBC	2	20717
Rigid RBC	2	9948
Rigid RBC	2	16823
Rigid RBC	2	53176
Rigid RBC	2	253
Rigid RBC	2	19348
Rigid RBC	2	289845
Rigid RBC	2	158768
Rigid RBC	2	14814
Rigid RBC	2	62612
Rigid RBC	2	18910
Rigid RBC	2	21181
Rigid RBC	2	35608
Rigid RBC	2	75520
Rigid RBC	2	15129
Rigid RBC	2	91671
Rigid RBC	2	9739
Rigid RBC	2	28236
Rigid RBC	2	92996
Rigid RBC	2	51219
Rigid RBC	2	42618
Rigid RBC	2	74908
Rigid RBC	2	16688
Rigid RBC	2	245410
Rigid RBC	2	241202
Rigid RBC	2	109119
Rigid RBC	2	68707
Rigid RBC	2	72851
Rigid RBC	2	130424
Rigid RBC	2	51007
Rigid RBC	2	122183
Rigid RBC	2	23333
Rigid RBC	2	30263
Rigid RBC	2	267487
Rigid RBC	2	5443
Rigid RBC	2	22158
Rigid RBC	2	75121
Rigid RBC	2	75790
Rigid RBC	2	71106
Rigid RBC	2	44593
Rigid RBC	2	19593
Rigid RBC	2	71763
Rigid RBC	2	90471
Rigid RBC	2	78909
Rigid RBC	2	63618
Rigid RBC	2	10866
Rigid RBC	2	32744
Rigid RBC	2	121753
Rigid RBC	2	32360
Rigid RBC	2	44030
Rigid RBC	2	61917
Rigid RBC	2	34995
Rigid RBC	2	11
Rigid RBC	2	11362
Rigid RBC	2	12285
Rigid RBC	2	19397
Rigid RBC	2	13462
Rigid RBC	2	139849
Rigid RBC	2	124007
Rigid RBC	2	76054
Rigid RBC	2	20704
Rigid RBC	2	23787
Rigid RBC	2	8641
Rigid RBC	2	4547
Rigid RBC	2	10164
Rigid RBC	2	89296
Rigid RBC	2	28962
Rigid RBC	2	49773
Rigid RBC	2	129034
Rigid RBC	2	184016
Rigid RBC	2	80625
Rigid RBC	2	35541
Rigid RBC	2	56381
Rigid RBC	2	8826
Rigid RBC	2	73424
Rigid RBC	2	2698
Rigid RBC	2	135662
Rigid RBC	2	51095
Rigid RBC	2	10923
Rigid RBC	2	35754
Rigid RBC	2	28374
Rigid RBC	2	18713
Rigid RBC	2	233547
Rigid RBC	2	27155
Rigid RBC	2	10124
Rigid RBC	2	46662
Rigid RBC	2	6503
Rigid RBC	2	15838
Rigid RBC	2	44963
Rigid RBC	2	28325
Rigid RBC	2	84964
Rigid RBC	2	17936
Rigid RBC	2	153062
Rigid RBC	2	94157
Rigid RBC	2	5551
Rigid RBC	2	69935
Rigid RBC	2	7350
Rigid RBC	2	97991
Rigid RBC	2	26511
Rigid RBC	2	9292
Rigid RBC	2	6281
Rigid RBC	2	10756
Rigid RBC	2	11202
Rigid RBC	2	4638
Rigid RBC	2	265238
Rigid RBC	2	113200
Rigid RBC	2	15313
Rigid RBC	2	236234
Rigid RBC	2	190155
Rigid RBC	2	14552
Rigid RBC	2	5709
Rigid RBC	2	42318
Rigid RBC	2	33941
Rigid RBC	2	36
Rigid RBC	2	35699
Rigid RBC	2	59497
Rigid RBC	2	29253
Rigid RBC	2	16758
Rigid RBC	2	56692
Rigid RBC	2	84349
Rigid RBC	2	236337
Rigid RBC	2	26003
Rigid RBC	2	11351
Rigid RBC	2	186361
Rigid RBC	2	63018
Rigid RBC	2	55167
Rigid RBC	2	55347
Rigid RBC	2	62930
Rigid RBC	2	35446
Rigid RBC	2	25377
Rigid RBC	2	12613
Rigid RBC	2	206078
Rigid RBC	2	6844
Rigid RBC	2	11233
Rigid RBC	2	26020
Rigid RBC	2	48054
Rigid RBC	2	39592
Rigid RBC	2	124485
Rigid RBC	2	84177
Rigid RBC	2	55752
Rigid RBC	2	108681
Rigid RBC	2	34822
Rigid RBC	2	155769
Rigid RBC	2	166844
Rigid RBC	2	51380
Rigid RBC	2	55474
Rigid RBC	2	91613
Rigid RBC	2	130644
Rigid RBC	2	51841
Rigid RBC	2	34753
Rigid RBC	2	60484
Rigid RBC	2	36964
Rigid RBC	2	2601
Rigid RBC	2	5933
Rigid RBC	2	33191
Rigid RBC	2	33256
Rigid RBC	2	8892
Rigid RBC	2	75762
Rigid RBC	2	49260
Rigid RBC	2	12682
Rigid RBC	2	21104
Rigid RBC	2	68258
Rigid RBC	2	110885
Rigid RBC	2	23
Rigid RBC	2	11982
Rigid RBC	2	3158
Rigid RBC	2	72001
Rigid RBC	2	6484
Rigid RBC	2	40637
Rigid RBC	2	83456
Rigid RBC	2	106608
Rigid RBC	2	113670
Rigid RBC	2	4114
Rigid RBC	2	54814
Rigid RBC	2	214397
Rigid RBC	2	9943
Rigid RBC	2	178877
Rigid RBC	2	52956
Rigid RBC	2	3018
Rigid RBC	2	52015
Rigid RBC	2	242788
Rigid RBC	2	68722
Rigid RBC	2	134239
Rigid RBC	2	312035
Rigid RBC	2	73472
Rigid RBC	2	19344
Rigid RBC	2	9173
Rigid RBC	2	112972
Rigid RBC	2	20356
Rigid RBC	2	28049
Rigid RBC	2	96664
Rigid RBC	2	190581
Rigid RBC	2	25975
Rigid RBC	2	6691
Rigid RBC	2	75477
Rigid RBC	2	20444
Rigid RBC	2	135024
Rigid RBC	2	1922
Rigid RBC	2	30597
Rigid RBC	2	29251
Rigid RBC	2	44407
Rigid RBC	2	81710
Rigid RBC	2	101922
Rigid RBC	2	6067
Rigid RBC	2	75749
Rigid RBC	2	54089
Rigid RBC	2	67772
Rigid RBC	2	11519
Rigid RBC	2	22356
Rigid RBC	2	27401
Rigid RBC	2	23633
Rigid RBC	2	151734
Rigid RBC	2	16
Rigid RBC	2	83456
Rigid RBC	2	8898
Rigid RBC	2	3580
Rigid RBC	2	51225
Rigid RBC	2	114867
Rigid RBC	2	14502
Rigid RBC	2	197295
Rigid RBC	2	51918
Rigid RBC	2	55599
Rigid RBC	2	56835
Rigid RBC	2	18099
Rigid RBC	2	76438
Rigid RBC	2	12097
Rigid RBC	2	51871
Rigid RBC	2	76248
Rigid RBC	2	57081
Rigid RBC	2	214145
Rigid RBC	2	157449
Rigid RBC	2	39518
Rigid RBC	2	93324
Rigid RBC	2	64742
Rigid RBC	2	19470
Rigid RBC	2	35609
Rigid RBC	2	14767
Rigid RBC	2	144037
Rigid RBC	2	27278
Rigid RBC	2	184342
Rigid RBC	2	85260
Rigid RBC	2	24541
Rigid RBC	2	51363
Rigid RBC	2	56946
Rigid RBC	2	48024
Rigid RBC	2	6096
Rigid RBC	2	5619
Rigid RBC	2	49610
Rigid RBC	2	70999
Rigid RBC	2	6736
Rigid RBC	2	22504
Rigid RBC	2	163642
Rigid RBC	2	48659
Rigid RBC	2	4767
Rigid RBC	2	28315
Rigid RBC	2	76277
Rigid RBC	2	39310
Rigid RBC	2	138633
Rigid RBC	2	68876
Rigid RBC	2	31912
Rigid RBC	2	60490
Rigid RBC	2	100717
Rigid RBC	2	77518
Rigid RBC	2	119126
Rigid RBC	2	70715
Rigid RBC	2	16684
Rigid RBC	2	3439
Rigid RBC	2	68982
Rigid RBC	2	26664
Rigid RBC	2	40143
Rigid RBC	2	18372
Rigid RBC	2	18713
Rigid RBC	2	106371
Rigid RBC	2	173643
Rigid RBC	2	34818
Rigid RBC	2	18881
Rigid RBC	2	10296
Rigid RBC	2	6980
Rigid RBC	2	16276
Rigid RBC	2	58461
Rigid RBC	2	945
Rigid RBC	2	86879
Rigid RBC	2	98029
Rigid RBC	2	27770
Rigid RBC	2	58126
Rigid RBC	2	6736
Rigid RBC	2	37126
Rigid RBC	2	25886
Rigid RBC	2	122182
Rigid RBC	2	123962
Rigid RBC	2	138241
Rigid RBC	2	22639
Rigid RBC	2	43169
Rigid RBC	2	42747
Rigid RBC	2	197045
Rigid RBC	2	28085
Rigid RBC	2	2510
Rigid RBC	2	43369
Rigid RBC	2	13518
Rigid RBC	2	76087
Rigid RBC	2	107010
Rigid RBC	2	52002
Rigid RBC	2	90488
Rigid RBC	2	72070
Rigid RBC	2	15915
Rigid RBC	2	29925
Rigid RBC	2	58480
Rigid RBC	2	83538
Rigid RBC	2	27088
Rigid RBC	2	60484
Rigid RBC	2	75842
Rigid RBC	2	17952
Rigid RBC	2	8897
Rigid RBC	2	14543
Rigid RBC	2	80541
Rigid RBC	2	11
Rigid RBC	2	63675
Rigid RBC	2	38992
Rigid RBC	2	11200
Rigid RBC	2	72989
Rigid RBC	2	12429
Rigid RBC	2	76701
Rigid RBC	2	53176
Rigid RBC	2	40717
Rigid RBC	2	108382
Rigid RBC	2	9513
Rigid RBC	2	32821
Rigid RBC	2	119651
Rigid RBC	2	88123
Rigid RBC	2	45441
Rigid RBC	2	38796
Rigid RBC	2	5627
Rigid RBC	2	4403
Rigid RBC	2	31931
Rigid RBC	2	20679
Rigid RBC	2	98176
Rigid RBC	2	22750
Rigid RBC	2	34429
Rigid RBC	2	153418
Rigid RBC	2	26052
Rigid RBC	2	17269
Rigid RBC	2	11302
Rigid RBC	2	77913
Rigid RBC	2	24883
Rigid RBC	2	76906
Rigid RBC	2	10409
Rigid RBC	2	111450
Rigid RBC	2	158975
Rigid RBC	2	42109
Rigid RBC	2	10269
Rigid RBC	2	95674
Rigid RBC	2	184545
Rigid RBC	2	169430
Rigid RBC	2	75658
Rigid RBC	2	32233
Rigid RBC	2	49179
Rigid RBC	2	5483
Rigid RBC	2	287548
Rigid RBC	2	8882
Rigid RBC	2	10142
Rigid RBC	2	185153
Rigid RBC	2	40143
Rigid RBC	2	70011
Rigid RBC	2	19975
Rigid RBC	2	6439
Rigid RBC	2	85239
Rigid RBC	2	6195
Rigid RBC	2	49881
Rigid RBC	2	25679
Rigid RBC	2	4256
Rigid RBC	2	18102
Rigid RBC	2	14337
Rigid RBC	2	49371
Rigid RBC	2	32474
Rigid RBC	2	19212
Rigid RBC	2	3410
Rigid RBC	2	2
Rigid RBC	2	8154
Rigid RBC	2	186360
Rigid RBC	2	6007
Rigid RBC	2	77
Rigid RBC	2	41573
Rigid RBC	2	44639
Rigid RBC	2	16422
Rigid RBC	2	51762
Rigid RBC	2	280148
Rigid RBC	2	45055
Rigid RBC	2	40666
Rigid RBC	2	74717
Rigid RBC	2	46782
Rigid RBC	2	98598
Rigid RBC	2	82859
Rigid RBC	2	11201
Rigid RBC	2	22727
Rigid RBC	2	50973
Rigid RBC	2	88684
Rigid RBC	2	31323
Rigid RBC	2	17587
Rigid RBC	2	65778
Rigid RBC	2	90743
Rigid RBC	2	80982
Rigid RBC	2	10924
Rigid RBC	2	15434
Rigid RBC	2	40230
Rigid RBC	2	23342
Rigid RBC	2	18036
Rigid RBC	2	37643
Rigid RBC	2	2765
Rigid RBC	2	19364
Rigid RBC	2	29557
Rigid RBC	2	34055
Rigid RBC	2	27883
Rigid RBC	2	13747
Rigid RBC	2	7915
Rigid RBC	2	23314
Rigid RBC	2	101241
Rigid RBC	2	566
Rigid RBC	2	99061
Rigid RBC	2	59413
Rigid RBC	2	19692
Rigid RBC	2	17935
Rigid RBC	2	70900
Rigid RBC	2	16671
Rigid RBC	2	56493
Rigid RBC	2	6127
Rigid RBC	2	114936
Rigid RBC	2	32067
Rigid RBC	2	52970
Rigid RBC	2	155031
Rigid RBC	2	354176
Rigid RBC	2	10212
Rigid RBC	2	41814
Rigid RBC	2	9842
Rigid RBC	2	165878
Rigid RBC	2	45066
Rigid RBC	2	682
Rigid RBC	2	76928
Rigid RBC	2	35675
Rigid RBC	2	25502
Rigid RBC	2	45536
Rigid RBC	2	6232
Rigid RBC	2	210809
Rigid RBC	2	125128
Rigid RBC	2	53660
Rigid RBC	2	49620
Rigid RBC	2	6602
Rigid RBC	2	13874
Rigid RBC	2	29071
Rigid RBC	2	288887
Rigid RBC	2	73945
Rigid RBC	2	42169
Rigid RBC	2	8458
Rigid RBC	2	140468
Rigid RBC	2	28675
Rigid RBC	2	58415
Rigid RBC	2	9168
Rigid RBC	2	101490
Rigid RBC	2	14409
Rigid RBC	2	46302
Rigid RBC	2	52194
Rigid RBC	2	79073
Rigid RBC	2	7116
Rigid RBC	2	62610
Rigid RBC	2	79257
Rigid RBC	2	97842
Rigid RBC	2	2332
Rigid RBC	2	138039
Rigid RBC	2	80
Rigid RBC	2	40157
Rigid RBC	2	67020
Rigid RBC	2	163767
Rigid RBC	2	95579
Rigid RBC	2	970
Rigid RBC	2	75254
Rigid RBC	2	96666
Rigid RBC	2	95420
Rigid RBC	2	49043
Rigid RBC	2	12613
Rigid RBC	2	12523
Rigid RBC	2	24509
Rigid RBC	2	39174
Rigid RBC	2	5531
Rigid RBC	2	17107
Rigid RBC	2	160871
Rigid RBC	2	108416
Rigid RBC	2	23728
Rigid RBC	2	145113
Rigid RBC	2	3166
Rigid RBC	2	175189
Rigid RBC	2	45248
Rigid RBC	2	24904
Rigid RBC	2	46086
Rigid RBC	2	10923
Rigid RBC	2	137021
Rigid RBC	2	18930
Rigid RBC	2	73901
Rigid RBC	2	123699
Rigid RBC	2	6569
Rigid RBC	2	71100
Rigid RBC	2	14270
Rigid RBC	2	108591
Rigid RBC	2	31053
Rigid RBC	2	45044
Rigid RBC	2	11
Rigid RBC	2	76121
Rigid RBC	2	10186
Rigid RBC	2	33326
Rigid RBC	2	25311
Rigid RBC	2	5622
Rigid RBC	2	18826
Rigid RBC	2	22492
Rigid RBC	2	6736
Rigid RBC	2	49383
Rigid RBC	2	11824
Rigid RBC	2	146768
Rigid RBC	2	113854
Rigid RBC	2	10630
Rigid RBC	2	90789
Rigid RBC	2	64401
Rigid RBC	2	62937
Rigid RBC	2	84463
Rigid RBC	2	34983
Rigid RBC	2	116330
Rigid RBC	2	86
Rigid RBC	2	128904
Rigid RBC	2	250697
Rigid RBC	2	28234
Rigid RBC	2	5805
Rigid RBC	2	248413
Rigid RBC	2	239993
Rigid RBC	2	40222
Rigid RBC	2	18718
Rigid RBC	2	10826
Rigid RBC	2	71736
Rigid RBC	2	190813
Rigid RBC	2	182954
Rigid RBC	2	263448
Rigid RBC	2	26973
Rigid RBC	2	200131
Rigid RBC	2	6040
Rigid RBC	2	16447
Rigid RBC	2	18825
Rigid RBC	2	8136
Rigid RBC	2	204609
Rigid RBC	2	122201
Rigid RBC	2	1299
Rigid RBC	2	14112
Rigid RBC	2	122182
Rigid RBC	2	3822
Rigid RBC	2	153448
Rigid RBC	2	41814
Rigid RBC	2	3208
Rigid RBC	2	169496
Rigid RBC	2	36964
Rigid RBC	2	24396
Rigid RBC	2	70069
Rigid RBC	2	32203
Rigid RBC	2	3323
Rigid RBC	2	185889
Rigid RBC	2	12429
Rigid RBC	2	24540
Rigid RBC	2	24967
Rigid RBC	2	12764
Rigid RBC	2	35413
Rigid RBC	2	216439
Rigid RBC	2	26792
Rigid RBC	2	27793
Rigid RBC	2	5856
Rigid RBC	2	19903
Rigid RBC	2	45446
Rigid RBC	2	51213
Rigid RBC	2	5685
Rigid RBC	2	64251
Rigid RBC	2	28799
Rigid RBC	2	27668
Rigid RBC	2	13788
Rigid RBC	2	48917
Rigid RBC	2	28545
Rigid RBC	2	12803
Rigid RBC	2	25559
Rigid RBC	2	23620
Rigid RBC	2	46509
Rigid RBC	2	2017
Rigid RBC	2	16113
Rigid RBC	2	129177
Rigid RBC	2	190982
Rigid RBC	2	16463
Rigid RBC	2	51918
Rigid RBC	2	54468
Rigid RBC	2	122157
Rigid RBC	2	125314
Rigid RBC	2	24280
Rigid RBC	2	36778
Rigid RBC	2	41276
Rigid RBC	2	40148
Rigid RBC	2	19397
Rigid RBC	2	43096
Rigid RBC	2	63482
Rigid RBC	2	124158
Rigid RBC	2	56111
Rigid RBC	2	35986
Rigid RBC	2	32987
Rigid RBC	2	11493
Rigid RBC	2	33737
Rigid RBC	2	5261
Rigid RBC	2	89326
Rigid RBC	2	16688
Rigid RBC	2	48358
Rigid RBC	2	49941
Rigid RBC	2	34152
Rigid RBC	2	57888
Rigid RBC	2	46385
Rigid RBC	2	40220
Rigid RBC	2	17709
Rigid RBC	2	11924
Rigid RBC	2	178831
Rigid RBC	2	60843
Rigid RBC	2	53075
Rigid RBC	2	85071
Rigid RBC	2	15590
Rigid RBC	2	7913
Rigid RBC	2	111919
Rigid RBC	2	10398
Rigid RBC	2	8107
Rigid RBC	2	45453
Rigid RBC	2	86427
Rigid RBC	2	24541
Rigid RBC	2	4640
Rigid RBC	2	63619
Rigid RBC	2	98383
Rigid RBC	2	139956
Rigid RBC	2	41297
Rigid RBC	2	7607
Rigid RBC	2	109681
Rigid RBC	2	139451
Rigid RBC	2	64848
Rigid RBC	2	13628
Rigid RBC	2	16609
Rigid RBC	2	107848
Rigid RBC	2	14908
Rigid RBC	2	26551
Rigid RBC	2	32252
Rigid RBC	2	33894
Rigid RBC	2	46974
Rigid RBC	2	2609
Rigid RBC	2	17685
Rigid RBC	2	74526
Rigid RBC	2	6764
Rigid RBC	2	5918
Rigid RBC	2	109623
Rigid RBC	2	43126
Rigid RBC	2	9478
Rigid RBC	2	136897
Rigid RBC	2	39113
Rigid RBC	2	128273
Rigid RBC	2	18797
Rigid RBC	2	122261
Rigid RBC	2	18370
Rigid RBC	2	19597
Rigid RBC	2	21222
Rigid RBC	2	239929
Rigid RBC	2	136129
Rigid RBC	2	56454
Rigid RBC	2	67965
Rigid RBC	2	11488
Rigid RBC	2	2507
Rigid RBC	2	301165
Rigid RBC	2	18031
Rigid RBC	2	81488
Rigid RBC	2	87355
Rigid RBC	2	109604
Rigid RBC	2	93877
Rigid RBC	2	28310
Rigid RBC	2	33425
Rigid RBC	2	175763
Rigid RBC	2	75698
Rigid RBC	2	18724
Rigid RBC	2	18723
Rigid RBC	2	86461
Rigid RBC	2	47386
Rigid RBC	2	48753
Rigid RBC	2	127444
Rigid RBC	2	126059
Rigid RBC	2	24133
Rigid RBC	2	22128
Rigid RBC	2	64495
Rigid RBC	2	61877
Rigid RBC	2	45823
Rigid RBC	2	39599
Rigid RBC	2	26851
Rigid RBC	2	76336
Rigid RBC	2	114245
Rigid RBC	2	27639
Rigid RBC	2	49203
Rigid RBC	2	202416
Rigid RBC	2	76541
Rigid RBC	2	89352
Rigid RBC	2	9464
Rigid RBC	2	17764
Rigid RBC	2	62423
Rigid RBC	2	31596
Rigid RBC	2	122110
Rigid RBC	2	8698
Rigid RBC	2	16374
Rigid RBC	2	8892
Rigid RBC	2	99956
Rigid RBC	2	11449
Rigid RBC	2	108074
Rigid RBC	2	27430
Rigid RBC	2	55595
Rigid RBC	2	26
Rigid RBC	2	66151
Rigid RBC	2	17007
Rigid RBC	2	90896
Rigid RBC	2	232054
Rigid RBC	2	56983
Rigid RBC	2	48414
Rigid RBC	2	19038
Rigid RBC	2	69739
Rigid RBC	2	154104
Rigid RBC	2	196246
Rigid RBC	2	49196
Rigid RBC	2	51900
Rigid RBC	2	36778
Rigid RBC	2	64497
Rigid RBC	2	87816
Rigid RBC	2	86879
Rigid RBC	2	145077
Rigid RBC	2	38710
Rigid RBC	2	30902
Rigid RBC	2	251375
Rigid RBC	2	36
Rigid RBC	2	24399
Rigid RBC	2	83414
Rigid RBC	2	76086
Rigid RBC	2	47995
Rigid RBC	2	200729
Rigid RBC	2	36438
Rigid RBC	2	28284
Rigid RBC	2	16639
Rigid RBC	2	39639
Rigid RBC	2	122094
Rigid RBC	2	170662
Rigid RBC	2	100956
Rigid RBC	2	44963
Rigid RBC	2	60877
Rigid RBC	2	32650
Rigid RBC	2	17952
Rigid RBC	2	31861
Rigid RBC	2	131672
Rigid RBC	2	32288
Rigid RBC	2	18910
Rigid RBC	2	124325
Rigid RBC	2	62433
Rigid RBC	2	33301
Rigid RBC	2	39640
Rigid RBC	2	118073
Rigid RBC	2	105972
Rigid RBC	2	76523
Rigid RBC	2	18821
Rigid RBC	2	41030
Rigid RBC	2	73275
Rigid RBC	2	33916
Rigid RBC	2	217983
Rigid RBC	2	12563
Rigid RBC	2	43696
Rigid RBC	2	7756
Rigid RBC	2	5456
Rigid RBC	2	38725
Rigid RBC	2	13121
Rigid RBC	2	136537
Rigid RBC	2	11189
Rigid RBC	2	207241
Rigid RBC	2	4789
Rigid RBC	2	3375
Rigid RBC	2	46560
Rigid RBC	2	184761
Rigid RBC	2	64848
Rigid RBC	2	5528
Rigid RBC	2	38237
Rigid RBC	2	105958
Rigid RBC	2	31886
Rigid RBC	2	35752
Rigid RBC	2	53883
Rigid RBC	2	57008
Rigid RBC	2	156913
Rigid RBC	2	135002
Rigid RBC	2	43149
Rigid RBC	2	131683
Rigid RBC	2	66353
Rigid RBC	2	10109
Rigid RBC	2	5880
Rigid RBC	2	91403
Rigid RBC	2	13460
Rigid RBC	2	41200
Rigid RBC	2	131374
Rigid RBC	2	157394
Rigid RBC	2	22750
Rigid RBC	2	128826
Rigid RBC	2	45061
Rigid RBC	2	126726
Rigid RBC	2	35747
Rigid RBC	2	57929
Rigid RBC	2	178849
Rigid RBC	2	131592
Rigid RBC	2	39513
Rigid RBC	2	5572
Rigid RBC	2	66100
Rigid RBC	2	115616
Rigid RBC	2	22791
Rigid RBC	2	53348
Rigid RBC	2	6498
Rigid RBC	2	25297
Rigid RBC	2	26984
Rigid RBC	2	87276
Rigid RBC	2	55164
Rigid RBC	2	6499
Rigid RBC	2	231419
Rigid RBC	2	245396
Rigid RBC	2	135918
Rigid RBC	2	2540
Rigid RBC	2	11246
Rigid RBC	2	33873
Rigid RBC	2	96492
Rigid RBC	2	9806
Rigid RBC	2	21463
Rigid RBC	2	75459
Rigid RBC	2	16276
Rigid RBC	2	51929
Rigid RBC	2	22038
Rigid RBC	2	27601
Rigid RBC	2	6219
Rigid RBC	2	58479
Rigid RBC	2	2870
Rigid RBC	2	129547
Rigid RBC	2	303124
Rigid RBC	2	99749
Rigid RBC	2	201308
Rigid RBC	2	55595
Rigid RBC	2	13859
Rigid RBC	2	54546
Rigid RBC	2	294347
Rigid RBC	2	33713
Rigid RBC	2	39110
Rigid RBC	2	3066
Rigid RBC	2	6281
Rigid RBC	2	11201
Rigid RBC	2	8145
Rigid RBC	2	65407
Rigid RBC	2	49211
Rigid RBC	2	9010
Rigid RBC	2	79020
Rigid RBC	2	5535
Rigid RBC	2	71746
Rigid RBC	2	109216
Rigid RBC	2	6234
Rigid RBC	2	738
Rigid RBC	2	48151
Rigid RBC	2	71728
Rigid RBC	2	79177
Rigid RBC	2	77008
Rigid RBC	2	6739
Rigid RBC	2	2036
Rigid RBC	2	167218
Rigid RBC	2	28803
Rigid RBC	2	56950
Rigid RBC	2	66112
Rigid RBC	2	71763
Rigid RBC	2	8343
Rigid RBC	2	2468
Rigid RBC	2	36925
Rigid RBC	2	165251
Rigid RBC	2	87016
Rigid RBC	2	39026
Rigid RBC	2	61390
Rigid RBC	2	5535
Rigid RBC	2	16680
Rigid RBC	2	17402
Rigid RBC	2	284094
Rigid RBC	2	186379
Rigid RBC	2	131326
Rigid RBC	2	33873
Rigid RBC	2	100064
Rigid RBC	2	102821
Rigid RBC	2	77369
Rigid RBC	2	51428
Rigid RBC	2	118845
Rigid RBC	2	87046
Rigid RBC	2	24693
Rigid RBC	2	248588
Rigid RBC	2	82563
Rigid RBC	2	5535
Rigid RBC	2	16921
Rigid RBC	2	184347
Rigid RBC	2	18099
Rigid RBC	2	20689
Rigid RBC	2	24349
Rigid RBC	2	125193
Rigid RBC	2	12087
Rigid RBC	2	50532
Rigid RBC	2	16758
Rigid RBC	2	88488
Rigid RBC	2	127918
Rigid RBC	2	102994
Rigid RBC	2	71871
Rigid RBC	2	12944
Rigid RBC	2	42420
Rigid RBC	2	383973
Rigid RBC	2	80363
Rigid RBC	2	5966
Rigid RBC	2	97605
Rigid RBC	2	17634
Rigid RBC	2	5002
Rigid RBC	2	127954
Rigid RBC	2	31650
Rigid RBC	2	76115
Rigid RBC	2	82297
Rigid RBC	2	129788
Rigid RBC	2	69893
Rigid RBC	2	70271
Rigid RBC	2	126091
Rigid RBC	2	181490
Rigid RBC	2	11361
Rigid RBC	2	131183
Rigid RBC	2	123774
Rigid RBC	2	85758
Rigid RBC	2	84964
Rigid RBC	2	109231
Rigid RBC	2	69874
Rigid RBC	2	100889
Rigid RBC	2	78887
Rigid RBC	2	35439
Rigid RBC	2	83456
Rigid RBC	2	76100
Rigid RBC	2	24659
Rigid RBC	2	9722
Rigid RBC	2	6981
Rigid RBC	2	118145
Rigid RBC	2	8148
Rigid RBC	2	26234
Rigid RBC	2	27409
Rigid RBC	2	97826
Rigid RBC	2	100902
Rigid RBC	2	5380
Rigid RBC	2	89354
Rigid RBC	2	51702
Rigid RBC	2	280741
Rigid RBC	2	101298
Rigid RBC	2	71785
Rigid RBC	2	90453
Rigid RBC	2	22741
Rigid RBC	2	64356
Rigid RBC	2	23621
Rigid RBC	2	68882
Rigid RBC	2	5531
Rigid RBC	2	24973
Rigid RBC	2	256084
Rigid RBC	2	64385
Rigid RBC	2	15698
Rigid RBC	2	5904
Rigid RBC	2	60480
Rigid RBC	2	32194
Rigid RBC	2	28759
Rigid RBC	2	53203
Rigid RBC	2	6281
Rigid RBC	2	76927
Rigid RBC	2	61416
Rigid RBC	2	11153
Rigid RBC	2	62533
Rigid RBC	2	39584
Rigid RBC	2	53631
Rigid RBC	2	220700
Rigid RBC	2	60561
Rigid RBC	2	67504
Rigid RBC	2	25309
Rigid RBC	2	32494
Rigid RBC	2	89351
Rigid RBC	2	65319
Rigid RBC	2	256080
Rigid RBC	2	11012
Rigid RBC	2	101403
Rigid RBC	2	32305
Rigid RBC	2	16435
Rigid RBC	2	31702
Rigid RBC	2	39525
Rigid RBC	2	57930
Rigid RBC	2	123968
Rigid RBC	2	139155
Rigid RBC	2	6542
Rigid RBC	2	9526
Rigid RBC	2	31177
Rigid RBC	2	111620
Rigid RBC	2	72802
Rigid RBC	2	21848
Rigid RBC	2	36537
Rigid RBC	2	71777
Rigid RBC	2	5963
Rigid RBC	2	39453
Rigid RBC	2	36498
Rigid RBC	2	3442
Rigid RBC	2	2853
Rigid RBC	2	58397
Rigid RBC	2	62665
Rigid RBC	2	14879
Rigid RBC	2	48621
Rigid RBC	2	2099
Rigid RBC	2	5974
Rigid RBC	2	117119
Rigid RBC	2	9690
Rigid RBC	2	52562
Rigid RBC	2	39436
Rigid RBC	2	63006
Rigid RBC	2	3560
Rigid RBC	2	61377
Rigid RBC	2	19407
Rigid RBC	2	166365
Rigid RBC	2	163915
Rigid RBC	2	178142
Rigid RBC	2	24887
Rigid RBC	2	384798
Rigid RBC	2	71823
Rigid RBC	2	32867
Rigid RBC	2	248580
Rigid RBC	2	53817
Rigid RBC	2	71514
Rigid RBC	2	37152
Rigid RBC	2	4547
Rigid RBC	2	21211
Rigid RBC	2	31017
Rigid RBC	2	54499
Rigid RBC	2	130588
Rigid RBC	2	4232
Rigid RBC	2	6362
Rigid RBC	2	77957
Rigid RBC	2	58561
Rigid RBC	2	148949
Rigid RBC	2	2977
Rigid RBC	2	121452
Rigid RBC	2	124304
Rigid RBC	2	41241
Rigid RBC	2	147223
Rigid RBC	2	52210
Rigid RBC	2	2
Rigid RBC	2	48412
Rigid RBC	2	34145
Rigid RBC	2	161894
Rigid RBC	2	109452
Rigid RBC	2	7032
Rigid RBC	2	240956
Rigid RBC	2	105594
Rigid RBC	2	68349
Rigid RBC	2	81231
Rigid RBC	2	3353
Rigid RBC	2	49181
Rigid RBC	2	89853
Rigid RBC	2	14661
Rigid RBC	2	27431
Rigid RBC	2	124325
Rigid RBC	2	274200
Rigid RBC	2	11084
Rigid RBC	2	72861
Rigid RBC	2	40893
Rigid RBC	2	26234
Rigid RBC	2	34822
Rigid RBC	2	2
Rigid RBC	2	1699
Rigid RBC	2	46560
Rigid RBC	2	26632
Rigid RBC	2	63687
Rigid RBC	2	51209
Rigid RBC	2	123790
Rigid RBC	2	90690
Rigid RBC	2	54238
Rigid RBC	2	76224
Rigid RBC	2	3259
Rigid RBC	2	79379
Rigid RBC	2	172284
Rigid RBC	2	146594
Rigid RBC	2	129649
Rigid RBC	2	92418
Rigid RBC	2	81195
Rigid RBC	2	23285
Rigid RBC	2	3446
Rigid RBC	2	37151
Rigid RBC	2	76916
Rigid RBC	2	66075
Rigid RBC	2	121886
Rigid RBC	2	61849
Rigid RBC	2	135266
Rigid RBC	2	43114
Rigid RBC	2	57052
Rigid RBC	2	16678
Rigid RBC	2	148959
Rigid RBC	2	84
Rigid RBC	2	5980
Rigid RBC	2	83521
Rigid RBC	2	186949
Rigid RBC	2	75818
Rigid RBC	2	29794
Rigid RBC	2	18482
Rigid RBC	2	53072
Rigid RBC	2	128263
Rigid RBC	2	76087
Rigid RBC	2	43808
Rigid RBC	2	272665
Rigid RBC	2	205352
Rigid RBC	2	61148
Rigid RBC	2	217749
Rigid RBC	2	45925
Rigid RBC	2	166397
Rigid RBC	2	184552
Rigid RBC	2	35568
Rigid RBC	2	111962
Rigid RBC	2	184368
Rigid RBC	2	16859
Rigid RBC	2	311067
Rigid RBC	2	2724
Rigid RBC	2	121984
Rigid RBC	2	90481
Rigid RBC	2	50747
Rigid RBC	2	119471
Rigid RBC	2	59566
Rigid RBC	2	11998
Rigid RBC	2	20
Rigid RBC	2	35194
Rigid RBC	2	87825
Rigid RBC	2	39956
Rigid RBC	2	28929
Rigid RBC	2	55653
Rigid RBC	2	17931
Rigid RBC	2	29206
Rigid RBC	2	29576
Rigid RBC	2	59087
Rigid RBC	2	27029
Rigid RBC	2	88197
Rigid RBC	2	84719
Rigid RBC	2	15283
Rigid RBC	2	19914
Rigid RBC	2	138749
Rigid RBC	2	166387
Rigid RBC	2	13763
Rigid RBC	2	123285
Rigid RBC	2	18910
Rigid RBC	2	2849
Rigid RBC	2	13059
Rigid RBC	2	16463
Rigid RBC	2	17050
Rigid RBC	2	9515
Rigid RBC	2	24638
Rigid RBC	2	169891
Rigid RBC	2	18954
Rigid RBC	2	79379
Rigid RBC	2	157798
Rigid RBC	2	27637
Rigid RBC	2	39584
Rigid RBC	2	88372
Rigid RBC	2	20934
Rigid RBC	2	39639
Rigid RBC	2	9526
Rigid RBC	2	26976
Rigid RBC	2	219631
Rigid RBC	2	184018
Rigid RBC	2	108522
Rigid RBC	2	108650
Rigid RBC	2	334606
Rigid RBC	2	95681
Rigid RBC	2	27604
Rigid RBC	2	36485
Rigid RBC	2	116776
Rigid RBC	2	43669
Rigid RBC	2	35999
Rigid RBC	2	31495
Rigid RBC	2	76066
Rigid RBC	2	12776
Rigid RBC	2	56907
Rigid RBC	2	49710
Rigid RBC	2	18834
Rigid RBC	2	13833
Rigid RBC	2	53210
Rigid RBC	2	108681
Rigid RBC	2	55375
Rigid RBC	2	12429
Rigid RBC	2	52625
Rigid RBC	2	2507
Rigid RBC	2	23618
Rigid RBC	2	41703
Rigid RBC	2	2545
Rigid RBC	2	95619
Rigid RBC	2	99748
Rigid RBC	2	45687
Rigid RBC	2	80469
Rigid RBC	2	219357
Rigid RBC	2	121750
Rigid RBC	2	230712
Rigid RBC	2	13040
Rigid RBC	2	58983
Rigid RBC	2	140359
Rigid RBC	2	66269
Rigid RBC	2	68765
Rigid RBC	2	125165
Rigid RBC	2	32287
Rigid RBC	2	148121
Rigid RBC	2	33179
Rigid RBC	2	49109
Rigid RBC	2	10167
Rigid RBC	2	68883
Rigid RBC	2	117639
Rigid RBC	2	107870
Rigid RBC	2	46441
Rigid RBC	2	238910
Rigid RBC	2	24577
Rigid RBC	2	236188
Rigid RBC	2	67070
Rigid RBC	2	20427
Rigid RBC	2	62394
Rigid RBC	2	290553
Rigid RBC	2	98836
Rigid RBC	2	7358
Rigid RBC	2	26976
Rigid RBC	2	60432
Rigid RBC	2	45478
Rigid RBC	2	6236
Rigid RBC	2	6850
Rigid RBC	2	15
Rigid RBC	2	18370
Rigid RBC	2	55327
Rigid RBC	2	204552
Rigid RBC	2	169570
Rigid RBC	2	21300
Rigid RBC	2	352438
Rigid RBC	2	121486
Rigid RBC	2	29217
Rigid RBC	2	27371
Rigid RBC	2	17952
Rigid RBC	2	142136
Rigid RBC	2	139928
Rigid RBC	2	131161
Rigid RBC	2	13735
Rigid RBC	2	32042
Rigid RBC	2	200749
Rigid RBC	2	50857
Rigid RBC	2	45107
Rigid RBC	2	81111
Rigid RBC	2	31696
Rigid RBC	2	90068
Rigid RBC	2	31319
Rigid RBC	2	9736
Rigid RBC	2	21139
Rigid RBC	2	47009
Rigid RBC	2	19591
Rigid RBC	2	196183
Rigid RBC	2	88153
Rigid RBC	2	75939
Rigid RBC	2	64252
Rigid RBC	2	3822
Rigid RBC	2	83511
Rigid RBC	2	21229
Rigid RBC	2	173156
Rigid RBC	2	154146
Rigid RBC	2	46164
Rigid RBC	2	172305
Rigid RBC	2	54771
Rigid RBC	2	20438
Rigid RBC	2	51879
Rigid RBC	2	58351
Rigid RBC	2	101993
Rigid RBC	2	57937
Rigid RBC	2	51444
Rigid RBC	2	1693
Rigid RBC	2	154022
Rigid RBC	2	192559
Rigid RBC	2	60503
Rigid RBC	2	279704
Rigid RBC	2	112171
Rigid RBC	2	13460
Rigid RBC	2	74916
Rigid RBC	2	50142
Rigid RBC	2	175920
Rigid RBC	2	28123
Rigid RBC	2	18150
Rigid RBC	2	2511
Rigid RBC	2	89230
Rigid RBC	2	52315
Rigid RBC	2	85680
Rigid RBC	2	80076
Rigid RBC	2	3861
Rigid RBC	2	97823
Rigid RBC	2	2872
Rigid RBC	2	16589
Rigid RBC	2	156255
Rigid RBC	2	16421
Rigid RBC	2	128824
Rigid RBC	2	71925
Rigid RBC	2	27182
Rigid RBC	2	5528
Rigid RBC	2	235841
Rigid RBC	2	202127
Rigid RBC	2	66379
Rigid RBC	2	196888
Rigid RBC	2	26
Rigid RBC	2	30171
Rigid RBC	2	47646
Rigid RBC	2	49148
Rigid RBC	2	44963
Rigid RBC	2	7631
Rigid RBC	2	119976
Rigid RBC	2	15858
Rigid RBC	2	18747
Rigid RBC	2	34456
Rigid RBC	2	6495
Rigid RBC	2	145528
Rigid RBC	2	22896
Rigid RBC	2	21576
Rigid RBC	2	16231
Rigid RBC	2	16609
Rigid RBC	2	53206
Rigid RBC	2	132994
Rigid RBC	2	99264
Rigid RBC	2	4998
Rigid RBC	2	29207
Rigid RBC	2	9709
Rigid RBC	2	80954
Rigid RBC	2	28305
Rigid RBC	2	16463
Rigid RBC	2	2
Rigid RBC	2	13657
Rigid RBC	2	93896
Rigid RBC	2	26017
Rigid RBC	2	37356
Rigid RBC	2	134240
Rigid RBC	2	138229
Rigid RBC	2	165494
Rigid RBC	2	79482
Rigid RBC	2	39595
Rigid RBC	2	9912
Rigid RBC	2	18873
Rigid RBC	2	43438
Rigid RBC	2	88525
Rigid RBC	2	381901
Rigid RBC	2	130606
Rigid RBC	2	52297
Rigid RBC	2	6873
Rigid RBC	2	9154
Rigid RBC	2	2745
Rigid RBC	2	94169
Rigid RBC	2	5898
Rigid RBC	2	29206
Rigid RBC	2	40927
Rigid RBC	2	35896
Rigid RBC	2	66098
Rigid RBC	2	19684
Rigid RBC	2	2885
Rigid RBC	2	128841
Rigid RBC	2	60399
Rigid RBC	2	22993
Rigid RBC	2	87354
Rigid RBC	2	125357
Rigid RBC	2	184601
Rigid RBC	2	101922
Rigid RBC	2	52426
Rigid RBC	2	41200
Rigid RBC	2	18881
Rigid RBC	2	58978
Rigid RBC	2	23421
Rigid RBC	2	19247
Rigid RBC	2	397223
Rigid RBC	2	1324
Rigid RBC	2	91671
Rigid RBC	2	90096
Rigid RBC	2	178844
Rigid RBC	2	20678
Rigid RBC	2	68623
Rigid RBC	2	5933
Rigid RBC	2	107065
Rigid RBC	2	141875
Rigid RBC	2	66401
Rigid RBC	2	84947
Rigid RBC	2	60639
Rigid RBC	2	124085
Rigid RBC	2	5489
Rigid RBC	2	33603
Rigid RBC	2	112441
Rigid RBC	2	2365
Rigid RBC	2	98984
Rigid RBC	2	5315
Rigid RBC	2	67684
Rigid RBC	2	176521
Rigid RBC	2	18034
Rigid RBC	2	38430
Rigid RBC	2	89025
Rigid RBC	2	78142
Rigid RBC	2	387899
Rigid RBC	2	136798
Rigid RBC	2	2849
Rigid RBC	2	55641
Rigid RBC	2	74734
Rigid RBC	2	138165
Rigid RBC	2	561
Rigid RBC	2	23780
Rigid RBC	2	74492
Rigid RBC	2	16
Rigid RBC	2	85052
Rigid RBC	2	34839
Rigid RBC	2	6853
Rigid RBC	2	66142
Rigid RBC	2	5640
Rigid RBC	2	73991
Rigid RBC	2	98018
Rigid RBC	2	68989
Rigid RBC	2	154085
Rigid RBC	2	11059
Rigid RBC	2	52552
Rigid RBC	2	8153
Rigid RBC	2	85028
Rigid RBC	2	52827
Rigid RBC	2	84660
Rigid RBC	2	15894
Rigid RBC	2	76927
Rigid RBC	2	90732
Rigid RBC	2	11345
Rigid RBC	2	339685
Rigid RBC	2	58112
Rigid RBC	2	47650
Rigid RBC	2	14170
Rigid RBC	2	18917
Rigid RBC	2	146499
Rigid RBC	2	10831
Rigid RBC	2	13879
Rigid RBC	2	12511
Rigid RBC	2	135652
Rigid RBC	2	18826
Rigid RBC	2	138476
Rigid RBC	2	22587
Rigid RBC	2	11
Rigid RBC	2	36778
Rigid RBC	2	28356
Rigid RBC	2	34413
Rigid RBC	2	376783
Rigid RBC	2	18370
Rigid RBC	2	136815
Rigid RBC	2	58390
Rigid RBC	2	32372
Rigid RBC	2	57696
Rigid RBC	2	95214
Rigid RBC	2	3336
Rigid RBC	2	33385
Rigid RBC	2	170127
Rigid RBC	2	82805
Rigid RBC	2	127607
Rigid RBC	2	34913
Rigid RBC	2	36380
Rigid RBC	2	6059
Rigid RBC	2	34079
Rigid RBC	2	75560
Rigid RBC	2	285609
Rigid RBC	2	48002
Rigid RBC	2	103914
Rigid RBC	2	55036
Rigid RBC	2	40894
Rigid RBC	2	58894
Rigid RBC	2	9722
Rigid RBC	2	29268
Rigid RBC	2	76310
Rigid RBC	2	137551
Rigid RBC	2	4639
Rigid RBC	2	2
Rigid RBC	2	46773
Rigid RBC	2	21135
Rigid RBC	2	219696
Rigid RBC	2	32546
Rigid RBC	2	175148
Rigid RBC	2	8719
Rigid RBC	2	272846
Rigid RBC	2	62511
Rigid RBC	2	32474
Rigid RBC	2	35886
Rigid RBC	2	35611
Rigid RBC	2	74966
Rigid RBC	2	62458
Rigid RBC	2	10744
Rigid RBC	2	8857
Rigid RBC	2	8740
Rigid RBC	2	119779
Rigid RBC	2	89883
Rigid RBC	2	33425
Rigid RBC	2	43266
Rigid RBC	2	76089
Rigid RBC	2	12087
Rigid RBC	2	15892
Rigid RBC	2	33678
Rigid RBC	2	865
Rigid RBC	2	3378
Rigid RBC	2	57649
Rigid RBC	2	35999
Rigid RBC	2	268737
Rigid RBC	2	99984
Rigid RBC	2	38042
Rigid RBC	2	51871
Rigid RBC	2	90015
Rigid RBC	2	58496
Rigid RBC	2	24610
Rigid RBC	2	27249
Rigid RBC	2	85060
Rigid RBC	2	12231
Rigid RBC	2	6765
Rigid RBC	2	40867
Rigid RBC	2	19707
Rigid RBC	2	173089
Rigid RBC	2	64
Rigid RBC	2	219912
Rigid RBC	2	29925
Rigid RBC	2	107887
Rigid RBC	2	31370
Rigid RBC	2	13680
Rigid RBC	2	19374
Rigid RBC	2	112314
Rigid RBC	2	65498
Rigid RBC	2	18698
Rigid RBC	2	59239
Rigid RBC	2	43438
Rigid RBC	2	160852
Rigid RBC	2	171229
Rigid RBC	2	2745
Rigid RBC	2	24559
Rigid RBC	2	26813
Rigid RBC	2	6361
Rigid RBC	2	76907
Rigid RBC	2	909
Rigid RBC	2	91411
Rigid RBC	2	9502
Rigid RBC	2	83507
Rigid RBC	2	61737
Rigid RBC	2	3424
Rigid RBC	2	16352
Rigid RBC	2	43219
Rigid RBC	2	44325
Rigid RBC	2	108560
Rigid RBC	2	119794
Rigid RBC	2	30246
Rigid RBC	2	62605
Rigid RBC	2	143604
Rigid RBC	2	9119
Rigid RBC	2	80690
Rigid RBC	2	13922
Rigid RBC	2	70932
Rigid RBC	2	37889
Rigid RBC	2	59885
Rigid RBC	2	28880
Rigid RBC	2	119471
Rigid RBC	2	36063
Rigid RBC	2	204137
Rigid RBC	2	73934
Rigid RBC	2	129592
Rigid RBC	2	57018
Rigid RBC	2	32282
Rigid RBC	2	25982
Rigid RBC	2	16276
Rigid RBC	2	941
Rigid RBC	2	162186
Rigid RBC	2	49322
Rigid RBC	2	6277
Rigid RBC	2	41527
Rigid RBC	2	100667
Rigid RBC	2	22807
Rigid RBC	2	50758
Rigid RBC	2	104610
Rigid RBC	2	8130
Rigid RBC	2	48867
Rigid RBC	2	2085
Rigid RBC	2	101226
Rigid RBC	2	55402
Rigid RBC	2	15453
Rigid RBC	2	6980
Rigid RBC	2	32522
Rigid RBC	2	53683
Rigid RBC	2	27585
Rigid RBC	2	26470
Rigid RBC	2	135344
Rigid RBC	2	26623
Rigid RBC	2	9498
Rigid RBC	2	37694
Rigid RBC	2	10402
Rigid RBC	2	109211
Rigid RBC	2	135995
Rigid RBC	2	28128
Rigid RBC	2	2745
Rigid RBC	2	6495
Rigid RBC	2	33799
Rigid RBC	2	60498
Rigid RBC	2	105974
Rigid RBC	2	19944
Rigid RBC	2	25379
Rigid RBC	2	5900
Rigid RBC	2	43149
Rigid RBC	2	5537
Rigid RBC	2	221734
Rigid RBC	2	12507
Rigid RBC	2	45019
Rigid RBC	2	57894
Rigid RBC	2	73224
Rigid RBC	2	73908
Rigid RBC	2	33901
Rigid RBC	2	11133
Rigid RBC	2	215
Rigid RBC	2	115951
Rigid RBC	2	63296
Rigid RBC	2	60485
Rigid RBC	2	16710
Rigid RBC	2	43456
Rigid RBC	2	76087
Rigid RBC	2	25418
Rigid RBC	2	38985
Rigid RBC	2	98061
Rigid RBC	2	430040
Rigid RBC	2	250968
Rigid RBC	2	2395
Rigid RBC	2	219389
Rigid RBC	2	27029
Rigid RBC	2	137592
Rigid RBC	2	27081
Rigid RBC	2	34145
Rigid RBC	2	71132
Rigid RBC	2	120774
Rigid RBC	2	18982
Rigid RBC	2	108025
Rigid RBC	2	8230
Rigid RBC	2	32473
Rigid RBC	2	46489
Rigid RBC	2	41168
Rigid RBC	2	54659
Rigid RBC	2	92376
Rigid RBC	2	2
Rigid RBC	2	24928
Rigid RBC	2	68454
Rigid RBC	2	453022
Rigid RBC	2	22365
Rigid RBC	2	15898
Rigid RBC	2	155249
Rigid RBC	2	138471
Rigid RBC	2	78535
Rigid RBC	2	115743
Rigid RBC	2	79916
Rigid RBC	2	102459
Rigid RBC	2	95006
Rigid RBC	2	32901
Rigid RBC	2	245431
Rigid RBC	2	14538
Rigid RBC	2	58483
Rigid RBC	2	141411
Rigid RBC	2	15852
Rigid RBC	2	8153
Rigid RBC	2	133246
Rigid RBC	2	43628
Rigid RBC	2	98006
Rigid RBC	2	24862
Rigid RBC	2	129534
Rigid RBC	2	36946
Rigid RBC	2	43955
Rigid RBC	2	36782
Rigid RBC	2	70281
Rigid RBC	2	160111
Rigid RBC	2	87720
Rigid RBC	2	84733
Rigid RBC	2	2099
Rigid RBC	2	5931
Rigid RBC	2	120021
Rigid RBC	2	65948
Rigid RBC	2	33210
Rigid RBC	2	83507
Rigid RBC	2	95705
Rigid RBC	2	256639
Rigid RBC	2	80364
Rigid RBC	2	50919
Rigid RBC	2	55539
Rigid RBC	2	32881
Rigid RBC	2	49196
Rigid RBC	2	52839
Rigid RBC	2	36538
Rigid RBC	2	115385
Rigid RBC	2	59394
Rigid RBC	2	83095
Rigid RBC	2	26950
Rigid RBC	2	59366
Rigid RBC	2	251787
Rigid RBC	2	107301
Rigid RBC	2	22791
Rigid RBC	2	187655
Rigid RBC	2	277606
Rigid RBC	2	84202
Rigid RBC	2	18869
Rigid RBC	2	3570
Rigid RBC	2	91649
Rigid RBC	2	4527
Rigid RBC	2	39534
Rigid RBC	2	147653
Rigid RBC	2	129547
Rigid RBC	2	57620
Rigid RBC	2	153946
Rigid RBC	2	45453
Rigid RBC	2	36514
Rigid RBC	2	27057
Rigid RBC	2	10008
Rigid RBC	2	25377
Rigid RBC	2	226079
Rigid RBC	2	6887
Rigid RBC	2	44974
Rigid RBC	2	142921
Rigid RBC	2	19443
Rigid RBC	2	35637
Rigid RBC	2	7711
Rigid RBC	2	71726
Rigid RBC	2	94644
Rigid RBC	2	16003
Rigid RBC	2	17764
Rigid RBC	2	484
Rigid RBC	2	6040
Rigid RBC	2	86978
Rigid RBC	2	16003
Rigid RBC	2	44626
Rigid RBC	2	45536
Rigid RBC	2	64114
Rigid RBC	2	188840
Rigid RBC	2	20527
Rigid RBC	2	4608
Rigid RBC	2	180490
Rigid RBC	2	43509
Rigid RBC	2	159397
Rigid RBC	2	15603
Rigid RBC	2	3208
Rigid RBC	2	72159
Rigid RBC	2	28864
Rigid RBC	2	211090
Rigid RBC	2	29540
Rigid RBC	2	58442
Rigid RBC	2	67772
Rigid RBC	2	50855
Rigid RBC	2	13763
Rigid RBC	2	125157
Rigid RBC	2	77376
Rigid RBC	2	13879
Rigid RBC	2	99984
Rigid RBC	2	35699
Rigid RBC	2	136184
Rigid RBC	2	92693
Rigid RBC	2	95564
Rigid RBC	2	64233
Rigid RBC	2	3730
Rigid RBC	2	19031
Rigid RBC	2	43156
Rigid RBC	2	3500
Rigid RBC	2	3532
Rigid RBC	2	50914
Rigid RBC	2	180507
Rigid RBC	2	93893
Rigid RBC	2	35896
Rigid RBC	2	90488
Rigid RBC	2	144229
Rigid RBC	2	16
Rigid RBC	2	208687
Rigid RBC	2	27130
Rigid RBC	2	65173
Rigid RBC	2	53346
Rigid RBC	2	3193
Rigid RBC	2	141648
Rigid RBC	2	42586
Rigid RBC	2	6067
Rigid RBC	2	83843
Rigid RBC	2	104808
Rigid RBC	2	358446
Rigid RBC	2	112932
Rigid RBC	2	101873
Rigid RBC	2	12099
Rigid RBC	2	44326
Rigid RBC	2	22040
Rigid RBC	2	11164
Rigid RBC	2	42583
Rigid RBC	2	99258
Rigid RBC	2	50783
Rigid RBC	2	43264
Rigid RBC	2	58475
Rigid RBC	2	35527
Rigid RBC	2	216867
Rigid RBC	2	27660
Rigid RBC	2	120550
Rigid RBC	2	71197
Rigid RBC	2	61012
Rigid RBC	2	698
Rigid RBC	2	90446
Rigid RBC	2	33750
Rigid RBC	2	127364
Rigid RBC	2	36509
Rigid RBC	2	7872
Rigid RBC	2	139387
Rigid RBC	2	217735
Rigid RBC	2	8145
Rigid RBC	2	21630
Rigid RBC	2	153038
Rigid RBC	2	27430
Rigid RBC	2	66588
Rigid RBC	2	12423
Rigid RBC	2	71065
Rigid RBC	2	3573
Rigid RBC	2	11
Rigid RBC	2	70197
Rigid RBC	2	29292
Rigid RBC	2	4166
Rigid RBC	2	36491
Rigid RBC	2	113249
Rigid RBC	2	21238
Rigid RBC	2	41799
Rigid RBC	2	2005
Rigid RBC	2	10814
Rigid RBC	2	15432
Rigid RBC	2	72006
Rigid RBC	2	65392
Rigid RBC	2	30051
Rigid RBC	2	7848
Rigid RBC	2	43850
Rigid RBC	2	14932
Rigid RBC	2	16612
Rigid RBC	2	213
Rigid RBC	2	79054
Rigid RBC	2	48422
Rigid RBC	2	60482
Rigid RBC	2	27201
Rigid RBC	2	68064
Rigid RBC	2	86682
Rigid RBC	2	106999
Rigid RBC	2	69068
Rigid RBC	2	10567
Rigid RBC	2	53282
Rigid RBC	2	25689
Rigid RBC	2	5592
Rigid RBC	2	6730
Rigid RBC	2	28782
Rigid RBC	2	188095
Rigid RBC	2	45743
Rigid RBC	2	76428
Rigid RBC	2	120708
Rigid RBC	2	8748
Rigid RBC	2	27431
Rigid RBC	2	35978
Rigid RBC	2	52129
Rigid RBC	2	90446
Rigid RBC	2	160446
Rigid RBC	2	23299
Rigid RBC	2	86895
Rigid RBC	2	25660
Rigid RBC	2	14694
Rigid RBC	2	9526
Rigid RBC	2	19322
Rigid RBC	2	16942
Rigid RBC	2	21064
Rigid RBC	2	23
Rigid RBC	2	7831
Rigid RBC	2	108916
Rigid RBC	2	184856
Rigid RBC	2	42743
Rigid RBC	2	28894
Rigid RBC	2	45608
Rigid RBC	2	4657
Rigid RBC	2	131585
Rigid RBC	2	13491
Rigid RBC	2	55707
Rigid RBC	2	136939
Rigid RBC	2	272554
Rigid RBC	2	56019
Rigid RBC	2	138247
Rigid RBC	2	7895
Rigid RBC	2	26998
Rigid RBC	2	85778
Rigid RBC	2	7631
Rigid RBC	2	56420
Rigid RBC	2	73479
Rigid RBC	2	32920
Rigid RBC	2	81171
Rigid RBC	2	5506
Rigid RBC	2	11
Rigid RBC	2	32743
Rigid RBC	2	21343
Rigid RBC	2	46139
Rigid RBC	2	14089
Rigid RBC	2	11089
Rigid RBC	2	58443
Rigid RBC	2	92694
Rigid RBC	2	128993
Rigid RBC	2	94877
Rigid RBC	2	12276
Rigid RBC	2	72343
Rigid RBC	2	169588
Rigid RBC	2	252994
Rigid RBC	2	41579
Rigid RBC	2	13434
Rigid RBC	2	62937
Rigid RBC	2	239879
Rigid RBC	2	86
Rigid RBC	2	76272
Rigid RBC	2	2745
Rigid RBC	2	86640
Rigid RBC	2	8290
Rigid RBC	2	51380
Rigid RBC	2	17844
Rigid RBC	2	52828
Rigid RBC	2	20226
Rigid RBC	2	16212
Rigid RBC	2	30285
Rigid RBC	2	36229
[truncated: 30,001 more rows]
