# Supplementary material for: Stochastic bond dynamics facilitates alignment of malaria parasite at erythrocyte membrane upon invasion
Source: eLife journal article supplement (doi:10.7554/elife.56500), 2020-05-18
Supplement: fig9-data1 [file Parasite_displacement.xlsx]

## Sheet: mvel
RBC	KoffOverKonl	Velocity
Rigid RBC	2	0.14283
Rigid RBC	2	0.11849
Rigid RBC	2	0.27661
Rigid RBC	2	0.16902
Rigid RBC	2	0.3247
Rigid RBC	2	0.17398
Rigid RBC	2	0.29112
Rigid RBC	2	0.07873
Rigid RBC	2	0.0466
Rigid RBC	2	0.1225
Rigid RBC	2	0.06558
Rigid RBC	2	0.00561
Rigid RBC	2	0.0527
Rigid RBC	2	0.0471
Rigid RBC	2	0.05654
Rigid RBC	2	0.0159
Rigid RBC	2	0.00499
Rigid RBC	2	0.03838
Rigid RBC	2	0.15789
Rigid RBC	2	0.07076
Rigid RBC	2	0.08876
Rigid RBC	2	0.02973
Rigid RBC	2	0.0771
Rigid RBC	2	0.05756
Rigid RBC	2	0.0782
Rigid RBC	2	0.17415
Rigid RBC	2	0.12751
Rigid RBC	2	0.08443
Rigid RBC	2	0.1044
Rigid RBC	2	0.22583
Rigid RBC	2	0.1794
Rigid RBC	2	0.08284
Rigid RBC	2	0.03552
Rigid RBC	2	0.06781
Rigid RBC	2	0.42167
Rigid RBC	2	0.29165
Rigid RBC	2	0.15131
Rigid RBC	2	0.01758
Rigid RBC	2	0.18927
Rigid RBC	2	0.1774
Rigid RBC	2	0.02434
Rigid RBC	2	0.01213
Rigid RBC	2	0.33651
Rigid RBC	2	0.29709
Rigid RBC	2	0.17715
Rigid RBC	2	0.14295
Rigid RBC	2	0.01979
Rigid RBC	2	0.01444
Rigid RBC	2	0.33184
Rigid RBC	2	0.21681
Rigid RBC	2	0.2771
Rigid RBC	2	0.26461
Rigid RBC	2	0.27568
Rigid RBC	2	0.06075
Rigid RBC	2	0.10161
Rigid RBC	2	0.05873
Rigid RBC	2	0.19934
Rigid RBC	2	0.27836
Rigid RBC	2	0.05178
Rigid RBC	2	0.30188
Rigid RBC	2	0.28199
Rigid RBC	2	0.01745
Rigid RBC	2	0.07676
Rigid RBC	2	0.19122
Rigid RBC	2	0.13961
Rigid RBC	2	0.16244
Rigid RBC	2	0.37602
Rigid RBC	2	0.19474
Rigid RBC	2	0.07806
Rigid RBC	2	0.1645
Rigid RBC	2	0.06962
Rigid RBC	2	0.3539
Rigid RBC	2	0.44388
Rigid RBC	2	0.33655
Rigid RBC	2	0.11869
Rigid RBC	2	0.16619
Rigid RBC	2	0.22326
Rigid RBC	2	0.23662
Rigid RBC	2	0.0562
Rigid RBC	2	0.01832
Rigid RBC	2	0.06601
Rigid RBC	2	0.04611
Rigid RBC	2	0.3322
Rigid RBC	2	0.34676
Rigid RBC	2	0.05374
Rigid RBC	2	0.07885
Rigid RBC	2	0.02503
Rigid RBC	2	0.02588
Rigid RBC	2	0.00495
Rigid RBC	2	0.01085
Rigid RBC	2	0.01413
Rigid RBC	2	0.0501
Rigid RBC	2	0.013
Rigid RBC	2	0.06378
Rigid RBC	2	0.05266
Rigid RBC	2	0.09351
Rigid RBC	2	0.28437
Rigid RBC	2	0.28576
Rigid RBC	2	0.19076
Rigid RBC	2	0.32967
Rigid RBC	2	0.23152
Rigid RBC	2	0.16252
Rigid RBC	2	0.02857
Rigid RBC	2	0.06079
Rigid RBC	2	0.18338
Rigid RBC	2	0.35456
Rigid RBC	2	0.38584
Rigid RBC	2	0.20026
Rigid RBC	2	0.03259
Rigid RBC	2	0.15689
Rigid RBC	2	0.03063
Rigid RBC	2	0.02897
Rigid RBC	2	0.06056
Rigid RBC	2	0.06436
Rigid RBC	2	0.04373
Rigid RBC	2	0.09469
Rigid RBC	2	0.04366
Rigid RBC	2	0.0107
Rigid RBC	2	0.02523
Rigid RBC	2	0.02922
Rigid RBC	2	0.02181
Rigid RBC	2	0.19585
Rigid RBC	2	0.11151
Rigid RBC	2	0.23969
Rigid RBC	2	0.26363
Rigid RBC	2	0.27076
Rigid RBC	2	0.24319
Rigid RBC	2	0.2575
Rigid RBC	2	0.16702
Rigid RBC	2	0.07561
Rigid RBC	2	0.15516
Rigid RBC	2	0.12464
Rigid RBC	2	0.24069
Rigid RBC	2	0.03292
Rigid RBC	2	0.12398
Rigid RBC	2	0.04466
Rigid RBC	2	0.07581
Rigid RBC	2	0.25593
Rigid RBC	2	0.45474
Rigid RBC	2	0.30299
Rigid RBC	2	0.13702
Rigid RBC	2	0.16377
Rigid RBC	2	0.0114
Rigid RBC	2	0.27369
Rigid RBC	2	0.22366
Rigid RBC	2	0.22681
Rigid RBC	2	0.30874
Rigid RBC	2	0.20377
Rigid RBC	2	0.10254
Rigid RBC	2	0.06486
Rigid RBC	2	0.24058
Rigid RBC	2	0.12378
Rigid RBC	2	0.06058
Rigid RBC	2	0.07959
Rigid RBC	2	0.29645
Rigid RBC	2	0.06425
Rigid RBC	2	0.07682
Rigid RBC	2	0.09985
Rigid RBC	2	0.21209
Rigid RBC	2	0.2268
Rigid RBC	2	0.19615
Rigid RBC	2	0.34061
Rigid RBC	2	0.17358
Rigid RBC	2	0.11063
Rigid RBC	2	0.13006
Rigid RBC	2	0.12829
Rigid RBC	2	0.11911
Rigid RBC	2	0.07181
Rigid RBC	2	0.13688
Rigid RBC	2	0.18131
Rigid RBC	2	0.27417
Rigid RBC	2	0.25309
Rigid RBC	2	0.22355
Rigid RBC	2	0.14782
Rigid RBC	2	0.21933
Rigid RBC	2	0.04029
Rigid RBC	2	0.10289
Rigid RBC	2	0.1576
Rigid RBC	2	0.07115
Rigid RBC	2	0.38369
Rigid RBC	2	0.09308
Rigid RBC	2	0.30555
Rigid RBC	2	0.00949
Rigid RBC	2	0.1033
Rigid RBC	2	0.05396
Rigid RBC	2	0.01761
Rigid RBC	2	0.03274
Rigid RBC	2	0.07433
Rigid RBC	2	0.13876
Rigid RBC	2	0.01644
Rigid RBC	2	0.03639
Rigid RBC	2	0.05138
Rigid RBC	2	0.02266
Rigid RBC	2	0.01307
Rigid RBC	2	0.04989
Rigid RBC	2	0.32743
Rigid RBC	2	0.09354
Rigid RBC	2	0.08629
Rigid RBC	2	0.17601
Rigid RBC	2	0.21683
Rigid RBC	2	0.3794
Rigid RBC	2	0.06286
Rigid RBC	2	0.1693
Rigid RBC	2	0.12907
Rigid RBC	2	0.11759
Rigid RBC	2	0.08624
Rigid RBC	2	0.10069
Rigid RBC	2	0.26583
Rigid RBC	2	0.17394
Rigid RBC	2	0.29059
Rigid RBC	2	0.0495
Rigid RBC	2	0.05934
Rigid RBC	2	0.06168
Rigid RBC	2	0.31471
Rigid RBC	2	0.16816
Rigid RBC	2	0.0928
Rigid RBC	2	0.09426
Rigid RBC	2	0.08077
Rigid RBC	2	0.18036
Rigid RBC	2	0.04232
Rigid RBC	2	0.23671
Rigid RBC	2	0.14308
Rigid RBC	2	0.19123
Rigid RBC	2	0.37507
Rigid RBC	2	0.02063
Rigid RBC	2	0.02435
Rigid RBC	2	0.02478
Rigid RBC	2	0.03155
Rigid RBC	2	0.01029
Rigid RBC	2	0.0197
Rigid RBC	2	0.10613
Rigid RBC	2	0.13869
Rigid RBC	2	0.01639
Rigid RBC	2	0.19901
Rigid RBC	2	0.22831
Rigid RBC	2	0.18919
Rigid RBC	2	0.05177
Rigid RBC	2	0.20884
Rigid RBC	2	0.07652
Rigid RBC	2	0.03933
Rigid RBC	2	0.05845
Rigid RBC	2	0.14449
Rigid RBC	2	0.02063
Rigid RBC	2	0.02518
Rigid RBC	2	0.03883
Rigid RBC	2	0.28074
Rigid RBC	2	0.1759
Rigid RBC	2	0.24778
Rigid RBC	2	0.08329
Rigid RBC	2	0.1362
Rigid RBC	2	0.07205
Rigid RBC	2	0.14394
Rigid RBC	2	0.075
Rigid RBC	2	0.01691
Rigid RBC	2	0.03483
Rigid RBC	2	0.06547
Rigid RBC	2	0.0309
Rigid RBC	2	0.03258
Rigid RBC	2	0.04455
Rigid RBC	2	0.01992
Rigid RBC	2	0.00728
Rigid RBC	2	0.02679
Rigid RBC	2	0.06021
Rigid RBC	2	0.0345
Rigid RBC	2	0.00344
Rigid RBC	2	0.04519
Rigid RBC	2	0.0734
Rigid RBC	2	0.01489
Rigid RBC	2	0.17468
Rigid RBC	2	0.10534
Rigid RBC	2	0.23284
Rigid RBC	2	0.16641
Rigid RBC	2	0.12289
Rigid RBC	2	0.13212
Rigid RBC	2	0.20968
Rigid RBC	2	0.12278
Rigid RBC	2	0.15079
Rigid RBC	2	0.09846
Rigid RBC	2	0.175
Rigid RBC	2	0.1367
Rigid RBC	2	0.31758
Rigid RBC	2	0.12071
Rigid RBC	2	0.27808
Rigid RBC	2	0.25718
Rigid RBC	2	0.06066
Rigid RBC	2	0.24491
Rigid RBC	2	0.42949
Rigid RBC	2	0.33418
Rigid RBC	2	0.14514
Rigid RBC	2	0.12505
Rigid RBC	2	0.0922
Rigid RBC	2	0.06208
Rigid RBC	2	0.16764
Rigid RBC	2	0.15512
Rigid RBC	2	0.32064
Rigid RBC	2	0.28385
Rigid RBC	2	0.2314
Rigid RBC	2	0.12635
Rigid RBC	2	0.11939
Rigid RBC	2	0.25202
Rigid RBC	2	0.13041
Rigid RBC	2	0.10259
Rigid RBC	2	0.05687
Rigid RBC	2	0.20546
Rigid RBC	2	0.26482
Rigid RBC	2	0.03696
Rigid RBC	2	0.20636
Rigid RBC	2	0.29101
Rigid RBC	2	0.15375
Rigid RBC	2	0.13831
Rigid RBC	2	0.16929
Rigid RBC	2	0.11037
Rigid RBC	2	0.10145
Rigid RBC	2	0.28419
Rigid RBC	2	0.18535
Rigid RBC	2	0.31113
Rigid RBC	2	0.19
Rigid RBC	2	0.3769
Rigid RBC	2	0.15139
Rigid RBC	2	0.11704
Rigid RBC	2	0.12472
Rigid RBC	2	0.0572
Rigid RBC	2	0.05569
Rigid RBC	2	0.01634
Rigid RBC	2	0.12287
Rigid RBC	2	0.03893
Rigid RBC	2	0.04195
Rigid RBC	2	0.05013
Rigid RBC	2	0.07297
Rigid RBC	2	0.07808
Rigid RBC	2	0.03998
Rigid RBC	2	0.07017
Rigid RBC	2	0.07078
Rigid RBC	2	0.04747
Rigid RBC	2	0.06932
Rigid RBC	2	0.01578
Rigid RBC	2	0.10312
Rigid RBC	2	0.0293
Rigid RBC	2	0.17398
Rigid RBC	2	0.21966
Rigid RBC	2	0.2979
Rigid RBC	2	0.21103
Rigid RBC	2	0.14913
Rigid RBC	2	0.09096
Rigid RBC	2	0.02152
Rigid RBC	2	0.3377
Rigid RBC	2	0.05534
Rigid RBC	2	0.10835
Rigid RBC	2	0.36713
Rigid RBC	2	0.3309
Rigid RBC	2	0.02609
Rigid RBC	2	0.03869
Rigid RBC	2	0.02354
Rigid RBC	2	0.00785
Rigid RBC	2	0.09156
Rigid RBC	2	0.05026
Rigid RBC	2	0.02552
Rigid RBC	2	0.01879
Rigid RBC	2	0.15445
Rigid RBC	2	0.15622
Rigid RBC	2	0.17707
Rigid RBC	2	0.10538
Rigid RBC	2	0.11511
Rigid RBC	3	0.31669
Rigid RBC	3	0.33481
Rigid RBC	3	0.31766
Rigid RBC	3	0.07628
Rigid RBC	3	0.14566
Rigid RBC	3	0.50237
Rigid RBC	3	0.21817
Rigid RBC	3	0.23252
Rigid RBC	3	0.33036
Rigid RBC	3	0.35877
Rigid RBC	3	0.35545
Rigid RBC	3	0.20881
Rigid RBC	3	0.39199
Rigid RBC	3	0.34092
Rigid RBC	3	0.18714
Rigid RBC	3	0.24229
Rigid RBC	3	0.21546
Rigid RBC	3	0.14336
Rigid RBC	3	0.34338
Rigid RBC	3	0.25259
Rigid RBC	3	0.1537
Rigid RBC	3	0.29808
Rigid RBC	3	0.40008
Rigid RBC	3	0.28415
Rigid RBC	3	0.28778
Rigid RBC	3	0.08413
Rigid RBC	3	0.11769
Rigid RBC	3	0.18759
Rigid RBC	3	0.3908
Rigid RBC	3	0.18406
Rigid RBC	3	0.25459
Rigid RBC	3	0.17178
Rigid RBC	3	0.10944
Rigid RBC	3	0.035
Rigid RBC	3	0.29304
Rigid RBC	3	0.10659
Rigid RBC	3	0.14907
Rigid RBC	3	0.11374
Rigid RBC	3	0.07144
Rigid RBC	3	0.09201
Rigid RBC	3	0.09535
Rigid RBC	3	0.23582
Rigid RBC	3	0.17887
Rigid RBC	3	0.32685
Rigid RBC	3	0.05895
Rigid RBC	3	0.1254
Rigid RBC	3	0.34089
Rigid RBC	3	0.05401
Rigid RBC	3	0.21884
Rigid RBC	3	0.40117
Rigid RBC	3	0.35251
Rigid RBC	3	0.06161
Rigid RBC	3	0.33014
Rigid RBC	3	0.36131
Rigid RBC	3	0.36163
Rigid RBC	3	0.21704
Rigid RBC	3	0.0911
Rigid RBC	3	0.10526
Rigid RBC	3	0.15664
Rigid RBC	3	0.12316
Rigid RBC	3	0.13074
Rigid RBC	3	0.00388
Rigid RBC	3	0.04628
Rigid RBC	3	0.06099
Rigid RBC	3	0.03521
Rigid RBC	3	0.11889
Rigid RBC	3	0.04293
Rigid RBC	3	0.03814
Rigid RBC	3	0.26658
Rigid RBC	3	0.1116
Rigid RBC	3	0.1989
Rigid RBC	3	0.08219
Rigid RBC	3	0.05308
Rigid RBC	3	0.24208
Rigid RBC	3	0.04296
Rigid RBC	3	0.09431
Rigid RBC	3	0.25994
Rigid RBC	3	0.32452
Rigid RBC	3	0.09645
Rigid RBC	3	0.18379
Rigid RBC	3	0.31116
Rigid RBC	3	0.0619
Rigid RBC	3	0.05448
Rigid RBC	3	0.15247
Rigid RBC	3	0.10552
Rigid RBC	3	0.05677
Rigid RBC	3	0.05422
Rigid RBC	3	0.35049
Rigid RBC	3	0.07611
Rigid RBC	3	0.16959
Rigid RBC	3	0.40529
Rigid RBC	3	0.17925
Rigid RBC	3	0.07407
Rigid RBC	3	0.15472
Rigid RBC	3	0.13381
Rigid RBC	3	0.14211
Rigid RBC	3	0.2451
Rigid RBC	3	0.35224
Rigid RBC	3	0.2463
Rigid RBC	3	0.39058
Rigid RBC	3	0.12043
Rigid RBC	3	0.2924
Rigid RBC	3	0.21929
Rigid RBC	3	0.02304
Rigid RBC	3	0.10734
Rigid RBC	3	0.24695
Rigid RBC	3	0.1952
Rigid RBC	3	0.02762
Rigid RBC	3	0.09644
Rigid RBC	3	0.37985
Rigid RBC	3	0.05389
Rigid RBC	3	0.2538
Rigid RBC	3	0.17276
Rigid RBC	3	0.02294
Rigid RBC	3	0.07171
Rigid RBC	3	0.02116
Rigid RBC	3	0.16284
Rigid RBC	3	0.13762
Rigid RBC	3	0.03142
Rigid RBC	3	0.10304
Rigid RBC	3	0.05698
Rigid RBC	3	0.03871
Rigid RBC	3	0.21488
Rigid RBC	3	0.40911
Rigid RBC	3	0.06865
Rigid RBC	3	0.43605
Rigid RBC	3	0.16941
Rigid RBC	3	0.0967
Rigid RBC	3	0.07425
Rigid RBC	3	0.25676
Rigid RBC	3	0.17545
Rigid RBC	3	0.24523
Rigid RBC	3	0.02184
Rigid RBC	3	0.03018
Rigid RBC	3	0.08738
Rigid RBC	3	0.05742
Rigid RBC	3	0.01841
Rigid RBC	3	0.12537
Rigid RBC	3	0.1014
Rigid RBC	3	0.0712
Rigid RBC	3	0.0254
Rigid RBC	3	0.09035
Rigid RBC	3	0.02146
Rigid RBC	3	0.06416
Rigid RBC	3	0.0888
Rigid RBC	3	0.12027
Rigid RBC	3	0.01866
Rigid RBC	3	0.2818
Rigid RBC	3	0.16629
Rigid RBC	3	0.29304
Rigid RBC	3	0.34655
Rigid RBC	3	0.08769
Rigid RBC	3	0.08326
Rigid RBC	3	0.09582
Rigid RBC	3	0.14093
Rigid RBC	3	0.19613
Rigid RBC	3	0.13485
Rigid RBC	3	0.11927
Rigid RBC	3	0.18274
Rigid RBC	3	0.35999
Rigid RBC	3	0.1809
Rigid RBC	3	0.08066
Rigid RBC	3	0.07872
Rigid RBC	3	0.04148
Rigid RBC	3	0.12304
Rigid RBC	3	0.42827
Rigid RBC	3	0.18599
Rigid RBC	3	0.28517
Rigid RBC	3	0.06131
Rigid RBC	3	0.38164
Rigid RBC	3	0.49344
Rigid RBC	3	0.04796
Rigid RBC	3	0.15801
Rigid RBC	3	0.22301
Rigid RBC	3	0.36369
Rigid RBC	3	0.2883
Rigid RBC	3	0.29894
Rigid RBC	3	0.09621
Rigid RBC	3	0.41497
Rigid RBC	3	0.27465
Rigid RBC	3	0.19223
Rigid RBC	3	0.10032
Rigid RBC	3	0.32678
Rigid RBC	3	0.22594
Rigid RBC	3	0.20595
Rigid RBC	3	0.18341
Rigid RBC	3	0.20115
Rigid RBC	3	0.38259
Rigid RBC	3	0.15891
Rigid RBC	3	0.1161
Rigid RBC	3	0.21785
Rigid RBC	3	0.2161
Rigid RBC	3	0.25655
Rigid RBC	3	0.04824
Rigid RBC	3	0.0652
Rigid RBC	3	0.23219
Rigid RBC	3	0.15506
Rigid RBC	3	0.55693
Rigid RBC	3	0.08854
Rigid RBC	3	0.14654
Rigid RBC	3	0.32267
Rigid RBC	3	0.17053
Rigid RBC	3	0.16099
Rigid RBC	3	0.19736
Rigid RBC	3	0.24304
Rigid RBC	3	0.20978
Rigid RBC	3	0.12806
Rigid RBC	3	0.27161
Rigid RBC	3	0.10652
Rigid RBC	3	0.10785
Rigid RBC	3	0.30732
Rigid RBC	3	0.29439
Rigid RBC	3	0.12609
Rigid RBC	3	0.12513
Rigid RBC	3	0.17329
Rigid RBC	3	0.12795
Rigid RBC	3	0.25916
Rigid RBC	3	0.08356
Rigid RBC	3	0.30531
Rigid RBC	3	0.16313
Rigid RBC	3	0.32414
Rigid RBC	3	0.08321
Rigid RBC	3	0.21734
Rigid RBC	3	0.14019
Rigid RBC	3	0.15508
Rigid RBC	3	0.29749
Rigid RBC	3	0.11752
Rigid RBC	3	0.21165
Rigid RBC	3	0.28364
Rigid RBC	3	0.15073
Rigid RBC	3	0.07645
Rigid RBC	3	0.28523
Rigid RBC	3	0.33583
Rigid RBC	3	0.2142
Rigid RBC	3	0.17759
Rigid RBC	3	0.15893
Rigid RBC	3	0.06936
Rigid RBC	3	0.17545
Rigid RBC	3	0.18106
Rigid RBC	3	0.13522
Rigid RBC	3	0.17138
Rigid RBC	3	0.40062
Rigid RBC	3	0.30353
Rigid RBC	3	0.28324
Rigid RBC	3	0.16283
Rigid RBC	3	0.3373
Rigid RBC	3	0.05909
Rigid RBC	3	0.11204
Rigid RBC	3	0.25283
Rigid RBC	3	0.08988
Rigid RBC	3	0.22786
Rigid RBC	3	0.15966
Rigid RBC	3	0.33245
Rigid RBC	3	0.09484
Rigid RBC	3	0.08876
Rigid RBC	3	0.26387
Rigid RBC	3	0.41775
Rigid RBC	3	0.18023
Rigid RBC	3	0.20084
Rigid RBC	3	0.28562
Rigid RBC	3	0.31185
Rigid RBC	3	0.07839
Rigid RBC	3	0.27836
Rigid RBC	3	0.13175
Rigid RBC	3	0.2538
Rigid RBC	3	0.10857
Rigid RBC	3	0.40792
Rigid RBC	3	0.23593
Rigid RBC	3	0.18976
Rigid RBC	3	0.0948
Rigid RBC	3	0.23562
Rigid RBC	3	0.14226
Rigid RBC	3	0.09935
Rigid RBC	3	0.12732
Rigid RBC	3	0.16805
Rigid RBC	3	0.19763
Flexible RBC	2	0.1324
Flexible RBC	2	0.02055
Flexible RBC	2	0.08155
Flexible RBC	2	0.07837
Flexible RBC	2	0.09109
Flexible RBC	2	0.01523
Flexible RBC	2	0.08904
Flexible RBC	2	0.05461
Flexible RBC	2	0.05383
Flexible RBC	2	0.0504
Flexible RBC	2	0.05386
Flexible RBC	2	0.04878
Flexible RBC	2	0.08485
Flexible RBC	2	0.14733
Flexible RBC	2	0.13704
Flexible RBC	2	0.04017
Flexible RBC	2	0.03355
Flexible RBC	2	0.05204
Flexible RBC	2	0.10204
Flexible RBC	2	0.01247
Flexible RBC	2	0.06162
Flexible RBC	2	0.0209
Flexible RBC	2	0.04703
Flexible RBC	2	0.02733
Flexible RBC	2	0.07957
Flexible RBC	2	0.05692
Flexible RBC	2	0.04218
Flexible RBC	2	0.05175
Flexible RBC	2	0.03978
Flexible RBC	2	0.01614
Flexible RBC	2	0.0284
Flexible RBC	2	0.0588
Flexible RBC	2	0.06225
Flexible RBC	2	0.07269
Flexible RBC	2	0.01596
Flexible RBC	2	0.01736
Flexible RBC	2	0.03633
Flexible RBC	2	0.05409
Flexible RBC	2	0.0264
Flexible RBC	2	0.04482
Flexible RBC	2	0.036
Flexible RBC	2	0.00901
Flexible RBC	2	0.02396
Flexible RBC	2	0.01831
Flexible RBC	2	0.07264
Flexible RBC	2	0.02435
Flexible RBC	2	0.0423
Flexible RBC	2	0.1453
Flexible RBC	2	0.11772
Flexible RBC	2	0.04379
Flexible RBC	2	0.02612
Flexible RBC	2	0.09212
Flexible RBC	2	0.04285
Flexible RBC	2	0.03516
Flexible RBC	2	0.03657
Flexible RBC	2	0.13335
Flexible RBC	2	0.03434
Flexible RBC	2	0.0721
Flexible RBC	2	0.05496
Flexible RBC	2	0.08231
Flexible RBC	2	0.04489
Flexible RBC	2	0.01294
Flexible RBC	2	0.03045
Flexible RBC	2	0.01684
Flexible RBC	2	0.00767
Flexible RBC	2	0.05837
Flexible RBC	2	0.01565
Flexible RBC	2	0.04646
Flexible RBC	2	0.01644
Flexible RBC	2	0.01367
Flexible RBC	2	0.06444
Flexible RBC	2	0.06262
Flexible RBC	2	0.05767
Flexible RBC	2	0.0591
Flexible RBC	2	0.04019
Flexible RBC	2	0.04828
Flexible RBC	2	0.03969
Flexible RBC	2	0.06333
Flexible RBC	2	0.07536
Flexible RBC	2	0.03804
Flexible RBC	2	0.1123
Flexible RBC	2	0.06492
Flexible RBC	2	0.06773
Flexible RBC	2	0.02854
Flexible RBC	2	0.10771
Flexible RBC	2	0.02242
Flexible RBC	2	0.04251
Flexible RBC	2	0.05466
Flexible RBC	2	0.05706
Flexible RBC	2	0.02883
Flexible RBC	2	0.1361
Flexible RBC	2	0.13402
Flexible RBC	2	0.03691
Flexible RBC	2	0.05257
Flexible RBC	2	0.068
Flexible RBC	2	0.05064
Flexible RBC	2	0.03168
Flexible RBC	2	0.08749
Flexible RBC	2	0.10148
Flexible RBC	2	0.11403
Flexible RBC	2	0.06701
Flexible RBC	2	0.05027
Flexible RBC	2	0.08594
Flexible RBC	2	0.0776
Flexible RBC	2	0.01824
Flexible RBC	2	0.04173
Flexible RBC	2	0.02371
Flexible RBC	2	0.08458
Flexible RBC	2	0.03791
Flexible RBC	2	0.04651
Flexible RBC	2	0.03906
Flexible RBC	2	0.03309
Flexible RBC	2	0.00684
Flexible RBC	2	0.01114
Flexible RBC	2	0.15516
Flexible RBC	2	0.03133
Flexible RBC	2	0.03916
Flexible RBC	2	0.10466
Flexible RBC	2	0.05251
Flexible RBC	2	0.08986
Flexible RBC	2	0.04067
Flexible RBC	2	0.08096
Flexible RBC	2	0.02728
Flexible RBC	2	0.14677
Flexible RBC	2	0.05858
Flexible RBC	2	0.07479
Flexible RBC	2	0.05288
Flexible RBC	2	0.06662
Flexible RBC	2	0.05217
Flexible RBC	2	0.04877
Flexible RBC	2	0.07808
Flexible RBC	2	0.06168
Flexible RBC	2	0.07048
Flexible RBC	2	0.03286
Flexible RBC	2	0.08555
Flexible RBC	2	0.04793
Flexible RBC	2	0.03669
Flexible RBC	2	0.0426
Flexible RBC	2	0.07342
Flexible RBC	2	0.02012
Flexible RBC	2	0.03369
Flexible RBC	2	0.05429
Flexible RBC	2	0.05096
Flexible RBC	2	0.03023
Flexible RBC	2	0.00726
Flexible RBC	2	0.03012
Flexible RBC	2	0.04008
Flexible RBC	2	0.035
Flexible RBC	2	0.11917
Flexible RBC	2	0.07071
Flexible RBC	2	0.07814
Flexible RBC	2	0.03105
Flexible RBC	2	0.03378
Flexible RBC	2	0.05686
Flexible RBC	2	0.0631
Flexible RBC	2	0.05325
Flexible RBC	2	0.01359
Flexible RBC	2	0.04466
Flexible RBC	2	0.07487
Flexible RBC	2	0.05507
Flexible RBC	2	0.15851
Flexible RBC	2	0.13056
Flexible RBC	2	0.09899
Flexible RBC	2	0.02803
Flexible RBC	2	0.04708
Flexible RBC	2	0.05513
Flexible RBC	2	0.09794
Flexible RBC	2	0.05367
Flexible RBC	2	0.01733
Flexible RBC	2	0.02877
Flexible RBC	2	0.0336
Flexible RBC	2	0.01837
Flexible RBC	2	0.0226
Flexible RBC	2	0.01062
Flexible RBC	2	0.01326
Flexible RBC	2	0.02852
Flexible RBC	2	0.01273
Flexible RBC	2	0.03136
Flexible RBC	2	0.04439
Flexible RBC	2	0.0476
Flexible RBC	2	0.04779
Flexible RBC	2	0.0638
Flexible RBC	2	0.03326
Flexible RBC	2	0.0561
Flexible RBC	2	0.02575
Flexible RBC	2	0.0605
Flexible RBC	2	0.04518
Flexible RBC	2	0.07481
Flexible RBC	2	0.09794
Flexible RBC	2	0.04575
Flexible RBC	2	0.03037
Flexible RBC	2	0.06849
Flexible RBC	2	0.04392
Flexible RBC	2	0.03399
Flexible RBC	2	0.03018
Flexible RBC	2	0.03758
Flexible RBC	2	0.06418
Flexible RBC	2	0.04816
Flexible RBC	2	0.03033
Flexible RBC	2	0.05996
Flexible RBC	2	0.01976
Flexible RBC	2	0.03365
Flexible RBC	2	0.04194
Flexible RBC	2	0.07982
Flexible RBC	2	0.09467
Flexible RBC	2	0.0883
Flexible RBC	2	0.04088
Flexible RBC	2	0.04545
Flexible RBC	2	0.06062
Flexible RBC	2	0.12695
Flexible RBC	2	0.00382
Flexible RBC	2	0.01075
Flexible RBC	2	0.04144
Flexible RBC	2	0.04527
Flexible RBC	2	0.01721
Flexible RBC	2	0.01825
Flexible RBC	2	0.06879
Flexible RBC	2	0.02398
Flexible RBC	2	0.05171
Flexible RBC	2	0.03603
Flexible RBC	2	0.02317
Flexible RBC	2	0.0312
Flexible RBC	2	0.0152
Flexible RBC	2	0.07497
Flexible RBC	2	0.01495
Flexible RBC	2	0.09569
Flexible RBC	2	0.1107
Flexible RBC	2	0.04341
Flexible RBC	2	0.11441
Flexible RBC	2	0.03491
Flexible RBC	2	0.09181
Flexible RBC	2	0.05829
Flexible RBC	2	0.0672
Flexible RBC	2	0.02487
Flexible RBC	2	0.04553
Flexible RBC	2	0.07661
Flexible RBC	2	0.01278
Flexible RBC	2	0.08554
Flexible RBC	2	0.02577
Flexible RBC	2	0.0122
Flexible RBC	2	0.06279
Flexible RBC	2	0.04424
Flexible RBC	2	0.04012
Flexible RBC	2	0.02236
Flexible RBC	2	0.02225
Flexible RBC	2	0.05218
Flexible RBC	2	0.06447
Flexible RBC	2	0.01593
Flexible RBC	2	0.02626
Flexible RBC	2	0.11451
Flexible RBC	2	0.12372
Flexible RBC	2	0.05376
Flexible RBC	2	0.05627
Flexible RBC	2	0.09831
Flexible RBC	2	0.03535
Flexible RBC	2	0.09702
Flexible RBC	2	0.03206
Flexible RBC	2	0.05271
Flexible RBC	2	0.03209
Flexible RBC	2	0.06071
Flexible RBC	2	0.04383
Flexible RBC	2	0.0586
Flexible RBC	2	0.11123
Flexible RBC	2	0.03703
Flexible RBC	2	0.01017
Flexible RBC	2	0.02658
Flexible RBC	2	0.00511
Flexible RBC	2	0.01168
Flexible RBC	2	0.03284
Flexible RBC	2	0.01304
Flexible RBC	2	0.08529
Flexible RBC	2	0.11285
Flexible RBC	2	0.05362
Flexible RBC	2	0.06658
Flexible RBC	2	0.11985
Flexible RBC	2	0.10903
Flexible RBC	2	0.11143
Flexible RBC	2	0.0434
Flexible RBC	2	0.03581
Flexible RBC	2	0.05298
Flexible RBC	2	0.03216
Flexible RBC	2	0.03865
Flexible RBC	2	0.02838
Flexible RBC	2	0.02707
Flexible RBC	2	0.04912
Flexible RBC	2	0.05166
Flexible RBC	2	0.04205
Flexible RBC	2	0.0646
Flexible RBC	2	0.05694
Flexible RBC	2	0.04835
Flexible RBC	2	0.03831
Flexible RBC	2	0.03397
Flexible RBC	2	0.0263
Flexible RBC	2	0.02115
Flexible RBC	2	0.01332
Flexible RBC	2	0.02457
Flexible RBC	2	0.14837
Flexible RBC	2	0.10419
Flexible RBC	2	0.14608
Flexible RBC	2	0.11935
Flexible RBC	2	0.03503
Flexible RBC	2	0.0354
Flexible RBC	2	0.01152
Flexible RBC	2	0.03082
Flexible RBC	2	0.03206
Flexible RBC	2	0.03838
Flexible RBC	2	0.11704
Flexible RBC	2	0.03734
Flexible RBC	2	0.0093
Flexible RBC	2	0.03328
Flexible RBC	2	0.04056
Flexible RBC	2	0.02851
Flexible RBC	2	0.05958
Flexible RBC	2	0.03848
Flexible RBC	2	0.05145
Flexible RBC	2	0.05182
Flexible RBC	2	0.0291
Flexible RBC	2	0.05681
Flexible RBC	2	0.01729
Flexible RBC	2	0.0867
Flexible RBC	2	0.09556
Flexible RBC	2	0.05019
Flexible RBC	2	0.02218
Flexible RBC	2	0.11119
Flexible RBC	2	0.09969
Flexible RBC	2	0.04084
Flexible RBC	2	0.04957
Flexible RBC	2	0.03585
Flexible RBC	2	0.07305
Flexible RBC	2	0.05895
Flexible RBC	2	0.09041
Flexible RBC	2	0.07344
Flexible RBC	2	0.02974
Flexible RBC	2	0.04636
Flexible RBC	2	0.01284
Flexible RBC	2	0.01295
Flexible RBC	2	0.02092
Flexible RBC	2	0.05872
Flexible RBC	2	0.07712
Flexible RBC	2	0.06269
Flexible RBC	2	0.01074
Flexible RBC	2	0.1191
Flexible RBC	2	0.05475
Flexible RBC	2	0.11238
Flexible RBC	2	0.06304
Flexible RBC	2	0.05774
Flexible RBC	2	0.05293
Flexible RBC	2	0.12129
Flexible RBC	2	0.04295
Flexible RBC	2	0.03437
Flexible RBC	2	0.09262
Flexible RBC	2	0.02054
Flexible RBC	2	0.00878
Flexible RBC	2	0.07172
Flexible RBC	2	0.01737
Flexible RBC	2	0.02324
Flexible RBC	2	0.00831
Flexible RBC	2	0.03762
Flexible RBC	2	0.02917
Flexible RBC	2	0.03093
Flexible RBC	2	0.0258
Flexible RBC	2	0.01941
Flexible RBC	2	0.04201
Flexible RBC	2	0.07529
Flexible RBC	2	0.15279
Flexible RBC	2	0.07757
Flexible RBC	2	0.08662
Flexible RBC	2	0.00665
Flexible RBC	2	0.07808
Flexible RBC	2	0.05279
Flexible RBC	2	0.0195
Flexible RBC	2	0.04031
Flexible RBC	2	0.06006
Flexible RBC	2	0.02762
Flexible RBC	2	0.03294
Flexible RBC	2	0.02139
Flexible RBC	2	0.03684
Flexible RBC	2	0.01186
Flexible RBC	2	0.04079
Flexible RBC	2	0.07456
Flexible RBC	2	0.04963
Flexible RBC	2	0.03689
Flexible RBC	2	0.04224
Flexible RBC	2	0.00693
Flexible RBC	2	0.03456
Flexible RBC	2	0.0667
Flexible RBC	2	0.03616
Flexible RBC	2	0.02534
Flexible RBC	2	0.04306
Flexible RBC	2	0.03622
Flexible RBC	2	0.12704
Flexible RBC	2	0.12374
Flexible RBC	2	0.04346
Flexible RBC	2	0.02202
Flexible RBC	2	0.02088
Flexible RBC	2	0.09262
Flexible RBC	2	0.10777
Flexible RBC	2	0.05303
Flexible RBC	2	0.05116
Flexible RBC	2	0.02526
Flexible RBC	2	0.01948
Flexible RBC	2	0.03075
Flexible RBC	2	0.01286
Flexible RBC	2	0.01997
Flexible RBC	2	0.03282
Flexible RBC	2	0.02482
Flexible RBC	2	0.04395
Flexible RBC	2	0.06416
Flexible RBC	2	0.08683
Flexible RBC	2	0.10292
Flexible RBC	2	0.08555
Flexible RBC	2	0.05455
Flexible RBC	2	0.12615
Flexible RBC	2	0.02245
Flexible RBC	2	0.05692
Flexible RBC	2	0.03584
Flexible RBC	2	0.01835
Flexible RBC	2	0.03987
Flexible RBC	2	0.03916
Flexible RBC	2	0.03551
Flexible RBC	2	0.05984
Flexible RBC	2	0.08003
Flexible RBC	2	0.0951
Flexible RBC	2	0.01208
Flexible RBC	2	0.02736
Flexible RBC	2	0.03161
Flexible RBC	2	0.03215
Flexible RBC	2	0.02843
Flexible RBC	2	0.00564
Flexible RBC	2	0.01707
Flexible RBC	2	0.04818
Flexible RBC	2	0.14939
Flexible RBC	2	0.15281
Flexible RBC	2	0.08666
Flexible RBC	2	0.04998
Flexible RBC	2	0.09539
Flexible RBC	2	0.08689
Flexible RBC	2	0.09422
Flexible RBC	2	0.07259
Flexible RBC	2	0.06542
Flexible RBC	2	0.09056
Flexible RBC	2	0.02313
Flexible RBC	2	0.04022
Flexible RBC	2	0.04028
Flexible RBC	2	0.07465
Flexible RBC	2	0.06333
Flexible RBC	2	0.01701
Flexible RBC	2	0.02543
Flexible RBC	2	0.10204
Flexible RBC	2	0.03461
Flexible RBC	2	0.06218
Flexible RBC	2	0.0314
Flexible RBC	2	0.08053
Flexible RBC	2	0.01478
Flexible RBC	2	0.05804
Flexible RBC	2	0.03061
Flexible RBC	2	0.1227
Flexible RBC	2	0.09505
Flexible RBC	2	0.14132
Flexible RBC	2	0.05013
Flexible RBC	2	0.08093
Flexible RBC	2	0.06836
Flexible RBC	2	0.09117
Flexible RBC	2	0.02569
Flexible RBC	2	0.0282
Flexible RBC	2	0.04991
Flexible RBC	2	0.06952
Flexible RBC	2	0.08869
Flexible RBC	2	0.067
Flexible RBC	2	0.06656
Flexible RBC	2	0.04603
Flexible RBC	2	0.03364
Flexible RBC	2	0.01976
Flexible RBC	2	0.01717
Flexible RBC	2	0.02958
Flexible RBC	2	0.04065
Flexible RBC	2	0.04894
Flexible RBC	2	0.01592
Flexible RBC	2	0.04675
Flexible RBC	2	0.14893
Flexible RBC	2	0.11536
Flexible RBC	2	0.08827
Flexible RBC	2	0.11661
Flexible RBC	2	0.1072
Flexible RBC	2	0.04999
Flexible RBC	2	0.06823
Flexible RBC	2	0.03897
Flexible RBC	2	0.02671
Flexible RBC	2	0.02281
Flexible RBC	2	0.07046
Flexible RBC	2	0.02845
Flexible RBC	2	0.02854
Flexible RBC	2	0.04269
Flexible RBC	2	0.00956
Flexible RBC	2	0.01288
Flexible RBC	2	0.02625
Flexible RBC	2	0.00603
Flexible RBC	2	0.04709
Flexible RBC	2	0.03862
Flexible RBC	2	0.09616
Flexible RBC	2	0.02008
Flexible RBC	2	0.06344
Flexible RBC	2	0.05131
Flexible RBC	2	0.06512
Flexible RBC	2	0.08193
Flexible RBC	2	0.09052
Flexible RBC	2	0.03509
Flexible RBC	2	0.08499
Flexible RBC	2	0.04139
Flexible RBC	2	0.05353
Flexible RBC	2	0.07646
Flexible RBC	2	0.03952
Flexible RBC	2	0.01607
Flexible RBC	2	0.02964
Flexible RBC	2	0.14361
Flexible RBC	2	0.03476
Flexible RBC	2	0.0215
Flexible RBC	2	0.02617
Flexible RBC	2	0.04464
Flexible RBC	2	0.06314
Flexible RBC	2	0.08889
Flexible RBC	2	0.05867
Flexible RBC	2	0.04918
Flexible RBC	2	0.09328
Flexible RBC	2	0.05347
Flexible RBC	2	0.13381
Flexible RBC	2	0.13626
Flexible RBC	2	0.08143
Flexible RBC	2	0.06054
Flexible RBC	2	0.03544
Flexible RBC	2	0.10676
Flexible RBC	2	0.02421
Flexible RBC	2	0.02174
Flexible RBC	2	0.01488
Flexible RBC	2	0.03676
Flexible RBC	2	0.04443
Flexible RBC	2	0.01661
Flexible RBC	2	0.02044
Flexible RBC	2	0.00998
Flexible RBC	2	0.03497
Flexible RBC	2	0.0271
Flexible RBC	2	0.0396
Flexible RBC	2	0.03746
Flexible RBC	2	0.04054
Flexible RBC	2	0.04108
Flexible RBC	2	0.09183
Flexible RBC	2	0.03904
Flexible RBC	2	0.05852
Flexible RBC	2	0.08289
Flexible RBC	2	0.05133
Flexible RBC	2	0.02749
Flexible RBC	2	0.04963
Flexible RBC	2	0.09008
Flexible RBC	2	0.02836
Flexible RBC	2	0.0317
Flexible RBC	2	0.03185
Flexible RBC	2	0.04906
Flexible RBC	2	0.02095
Flexible RBC	2	0.05578
Flexible RBC	2	0.03218
Flexible RBC	2	0.01396
Flexible RBC	2	0.03823
Flexible RBC	2	0.05889
Flexible RBC	2	0.02944
Flexible RBC	2	0.01075
Flexible RBC	2	0.02064
Flexible RBC	2	0.14944
Flexible RBC	2	0.10499
Flexible RBC	2	0.15041
Flexible RBC	2	0.03379
Flexible RBC	2	0.04301
Flexible RBC	2	0.128
Flexible RBC	2	0.04908
Flexible RBC	2	0.02085
Flexible RBC	2	0.07043
Flexible RBC	2	0.07928
Flexible RBC	2	0.09883
Flexible RBC	2	0.06943
Flexible RBC	2	0.0748
Flexible RBC	2	0.11176
Flexible RBC	2	0.12946
Flexible RBC	2	0.02015
Flexible RBC	2	0.03626
Flexible RBC	2	0.06302
Flexible RBC	2	0.0138
Flexible RBC	2	0.01832
Flexible RBC	2	0.06104
Flexible RBC	2	0.05123
Flexible RBC	2	0.03417
Flexible RBC	2	0.02535
Flexible RBC	2	0.01346
Flexible RBC	2	0.15833
Flexible RBC	2	0.09964
Flexible RBC	2	0.03952
Flexible RBC	2	0.02407
Flexible RBC	2	0.09541
Flexible RBC	2	0.05806
Flexible RBC	2	0.01873
Flexible RBC	2	0.02635
Flexible RBC	2	0.01789
Flexible RBC	2	0.07199
Flexible RBC	2	0.05654
Flexible RBC	2	0.05204
Flexible RBC	2	0.04816
Flexible RBC	2	0.01692
Flexible RBC	2	0.02289
Flexible RBC	2	0.03042
Flexible RBC	2	0.03599
Flexible RBC	2	0.01687
Flexible RBC	2	0.01824
Flexible RBC	2	0.04923
Flexible RBC	2	0.00744
Flexible RBC	2	0.0044
Flexible RBC	2	0.02767
Flexible RBC	2	0.02108
Flexible RBC	2	0.08088
Flexible RBC	2	0.0658
Flexible RBC	2	0.07212
Flexible RBC	2	0.04516
Flexible RBC	2	0.03015
Flexible RBC	2	0.12154
Flexible RBC	2	0.04923
Flexible RBC	2	0.01976
Flexible RBC	2	0.04619
Flexible RBC	2	0.03651
Flexible RBC	2	0.00693
Flexible RBC	2	0.05376
Flexible RBC	2	0.08893
Flexible RBC	2	0.05488
Flexible RBC	2	0.02549
Flexible RBC	2	0.0284
Flexible RBC	2	0.01523
Flexible RBC	2	0.02094
Flexible RBC	2	0.0304
Flexible RBC	2	0.05232
Flexible RBC	2	0.0386
Flexible RBC	2	0.02972
Flexible RBC	2	0.04865
Flexible RBC	2	0.04929
Flexible RBC	2	0.03606
Flexible RBC	2	0.04066
Flexible RBC	2	0.02554
Flexible RBC	2	0.05215
Flexible RBC	2	0.05161
Flexible RBC	2	0.02556
Flexible RBC	2	0.03773
Flexible RBC	2	0.02786
Flexible RBC	2	0.03098
Flexible RBC	2	0.03388
Flexible RBC	2	0.03999
Flexible RBC	2	0.05081
Flexible RBC	2	0.03137
Flexible RBC	2	0.0492
Flexible RBC	2	0.03633
Flexible RBC	2	0.02862
Flexible RBC	2	0.03083
Flexible RBC	2	0.05906
Flexible RBC	2	0.06884
Flexible RBC	2	0.15564
Flexible RBC	2	0.10804
Flexible RBC	2	0.06615
Flexible RBC	2	0.06168
Flexible RBC	2	0.05702
Flexible RBC	2	0.02331
Flexible RBC	2	0.02426
Flexible RBC	2	0.03432
Flexible RBC	2	0.0462
Flexible RBC	2	0.0514
Flexible RBC	2	0.04465
Flexible RBC	2	0.04902
Flexible RBC	2	0.03016
Flexible RBC	2	0.02107
Flexible RBC	2	0.03828
Flexible RBC	2	0.04509
Flexible RBC	2	0.04491
Flexible RBC	2	0.05509
Flexible RBC	2	0.07696
Flexible RBC	2	0.03898
Flexible RBC	2	0.00677
Flexible RBC	2	0.03231
Flexible RBC	2	0.02882
Flexible RBC	2	0.03019
Flexible RBC	2	0.08115
Flexible RBC	2	0.06546
Flexible RBC	2	0.10074
Flexible RBC	2	0.12646
Flexible RBC	2	0.10076
Flexible RBC	2	0.01696
Flexible RBC	2	0.03064
Flexible RBC	2	0.03621
Flexible RBC	2	0.04277
Flexible RBC	2	0.10471
Flexible RBC	2	0.04585
Flexible RBC	2	0.01621
Flexible RBC	2	0.03749
Flexible RBC	2	0.03733
Flexible RBC	2	0.08754
Flexible RBC	2	0.05086
Flexible RBC	2	0.05565
Flexible RBC	2	0.02381
Flexible RBC	2	0.02391
Flexible RBC	2	0.02186
Flexible RBC	2	0.01365
Flexible RBC	2	0.03023
Flexible RBC	2	0.0162
Flexible RBC	2	0.0493
Flexible RBC	2	0.12841
Flexible RBC	2	0.07774
Flexible RBC	2	0.13621
Flexible RBC	2	0.07133
Flexible RBC	2	0.15499
Flexible RBC	2	0.07096
Flexible RBC	2	0.11624
Flexible RBC	2	0.06692
Flexible RBC	2	0.0777
Flexible RBC	2	0.02225
Flexible RBC	2	0.03689
Flexible RBC	2	0.02005
Flexible RBC	2	0.03106
Flexible RBC	2	0.12009
Flexible RBC	2	0.07446
Flexible RBC	2	0.02627
Flexible RBC	2	0.04353
Flexible RBC	2	0.04636
Flexible RBC	2	0.05471
Flexible RBC	2	0.03494
Flexible RBC	2	0.05158
Flexible RBC	2	0.14433
Flexible RBC	2	0.16079
Flexible RBC	2	0.13708
Flexible RBC	2	0.06606
Flexible RBC	2	0.04863
Flexible RBC	2	0.02836
Flexible RBC	2	0.05099
Flexible RBC	2	0.01574
Flexible RBC	2	0.02874
Flexible RBC	2	0.07275
Flexible RBC	2	0.04684
Flexible RBC	2	0.03336
Flexible RBC	2	0.03127
Flexible RBC	2	0.03237
Flexible RBC	2	0.0502
Flexible RBC	2	0.05421
Flexible RBC	2	0.06955
Flexible RBC	2	0.0421
Flexible RBC	2	0.03543
Flexible RBC	2	0.11085
Flexible RBC	2	0.10585
Flexible RBC	2	0.10459
Flexible RBC	2	0.0139
Flexible RBC	2	0.07909
Flexible RBC	2	0.06909
Flexible RBC	2	0.06502
Flexible RBC	2	0.08817
Flexible RBC	2	0.13607
Flexible RBC	2	0.11931
Flexible RBC	2	0.05154
Flexible RBC	2	0.03395
Flexible RBC	2	0.04614
Flexible RBC	2	0.04973
Flexible RBC	2	0.06805
Flexible RBC	2	0.05454
Flexible RBC	2	0.02748
Flexible RBC	2	0.0233
Flexible RBC	2	0.02454
Flexible RBC	2	0.02113
Flexible RBC	2	0.03077
Flexible RBC	2	0.09179
Flexible RBC	2	0.05716
Flexible RBC	2	0.05283
Flexible RBC	2	0.04141
Flexible RBC	2	0.02023
Flexible RBC	2	0.04217
Flexible RBC	2	0.00946
Flexible RBC	2	0.04556
Flexible RBC	2	0.01936
Flexible RBC	2	0.02709
Flexible RBC	2	0.05866
Flexible RBC	2	0.04164
Flexible RBC	2	0.03773
Flexible RBC	2	0.03346
Flexible RBC	2	0.15331
Flexible RBC	2	0.05661
Flexible RBC	2	0.06091
Flexible RBC	2	0.06485
Flexible RBC	2	0.13756
Flexible RBC	2	0.03925
Flexible RBC	2	0.08516
Flexible RBC	2	0.06924
Flexible RBC	2	0.03645
Flexible RBC	2	0.01684
Flexible RBC	2	0.01809
Flexible RBC	2	0.03716
Flexible RBC	2	0.07762
Flexible RBC	2	0.12799
Flexible RBC	2	0.03061
Flexible RBC	2	0.03293
Flexible RBC	2	0.02522
Flexible RBC	2	0.03883
Flexible RBC	2	0.04858
Flexible RBC	2	0.039
Flexible RBC	2	0.06329
Flexible RBC	2	0.10077
Flexible RBC	2	0.0611
Flexible RBC	2	0.14978
Flexible RBC	2	0.07101
Flexible RBC	2	0.03829
Flexible RBC	2	0.05009
Flexible RBC	2	0.06921
Flexible RBC	2	0.06259
Flexible RBC	2	0.02146
Flexible RBC	2	0.05901
Flexible RBC	2	0.05906
Flexible RBC	2	0.02279
Flexible RBC	2	0.05933
Flexible RBC	2	0.05609
Flexible RBC	2	0.06093
Flexible RBC	2	0.0104
Flexible RBC	2	0.0232
Flexible RBC	2	0.02552
Flexible RBC	2	0.06771
Flexible RBC	2	0.0255
Flexible RBC	2	0.05223
Flexible RBC	2	0.0446
Flexible RBC	2	0.01181
Flexible RBC	2	0.06462
Flexible RBC	2	0.09853
Flexible RBC	2	0.0433
Flexible RBC	2	0.0283
Flexible RBC	2	0.06257
Flexible RBC	2	0.0343
Flexible RBC	2	0.0854
Flexible RBC	2	0.03463
Flexible RBC	2	0.1585
Flexible RBC	2	0.14021
Flexible RBC	2	0.01411
Flexible RBC	2	0.0595
Flexible RBC	2	0.03558
Flexible RBC	2	0.02526
Flexible RBC	2	0.03592
Flexible RBC	2	0.016
Flexible RBC	2	0.05567
Flexible RBC	2	0.14397
Flexible RBC	2	0.06856
Flexible RBC	2	0.06522
Flexible RBC	2	0.06873
Flexible RBC	2	0.10392
Flexible RBC	2	0.09705
Flexible RBC	2	0.03267
Flexible RBC	2	0.02664
Flexible RBC	2	0.03526
Flexible RBC	2	0.04332
Flexible RBC	2	0.02687
Flexible RBC	2	0.03921
Flexible RBC	2	0.01218
Flexible RBC	2	0.0344
Flexible RBC	2	0.01616
Flexible RBC	2	0.0273
Flexible RBC	2	0.0157
Flexible RBC	2	0.02379
Flexible RBC	2	0.0125
Flexible RBC	2	0.03571
Flexible RBC	2	0.02957
Flexible RBC	2	0.01336
Flexible RBC	2	0.1174
Flexible RBC	2	0.14473
Flexible RBC	2	0.09927
Flexible RBC	2	0.04324
Flexible RBC	2	0.03027
Flexible RBC	2	0.04518
Flexible RBC	2	0.0042
Flexible RBC	2	0.07123
Flexible RBC	2	0.04575
Flexible RBC	2	0.07074
Flexible RBC	2	0.02856
Flexible RBC	2	0.01782
Flexible RBC	2	0.04356
Flexible RBC	2	0.10314
Flexible RBC	2	0.02192
Flexible RBC	2	0.0837
Flexible RBC	2	0.02514
Flexible RBC	2	0.01803
Flexible RBC	2	0.03896
Flexible RBC	2	0.03598
Flexible RBC	2	0.03035
Flexible RBC	2	0.02726
Flexible RBC	2	0.0258
Flexible RBC	2	0.01848
Flexible RBC	2	0.13538
Flexible RBC	2	0.04548
Flexible RBC	2	0.0446
Flexible RBC	2	0.08568
Flexible RBC	2	0.01846
Flexible RBC	2	0.04759
Flexible RBC	2	0.0543
Flexible RBC	2	0.02976
Flexible RBC	2	0.03548
Flexible RBC	2	0.07294
Flexible RBC	2	0.02804
Flexible RBC	2	0.01624
Flexible RBC	2	0.05519
Flexible RBC	2	0.04848
Flexible RBC	2	0.0172
Flexible RBC	2	0.05739
Flexible RBC	2	0.00279
Flexible RBC	2	0.03178
Flexible RBC	2	0.0228
Flexible RBC	2	0.03738
Flexible RBC	2	0.08694
Flexible RBC	2	0.094
Flexible RBC	2	0.0811
Flexible RBC	2	0.0524
Flexible RBC	2	0.05845
Flexible RBC	2	0.02013
Flexible RBC	2	0.02275
Flexible RBC	2	0.0228
Flexible RBC	2	0.04616
Flexible RBC	2	0.02614
Flexible RBC	2	0.05965
Flexible RBC	2	0.06119
Flexible RBC	2	0.07981
Flexible RBC	2	0.03639
Flexible RBC	2	0.08837
Flexible RBC	2	0.03664
Flexible RBC	2	0.01675
Flexible RBC	2	0.0297
Flexible RBC	2	0.04514
Flexible RBC	2	0.03436
Flexible RBC	2	0.03198
Flexible RBC	2	0.0176
Flexible RBC	2	0.03608
Flexible RBC	2	0.15742
Flexible RBC	2	0.13085
Flexible RBC	2	0.10786
Flexible RBC	2	0.1133
Flexible RBC	2	0.07197
Flexible RBC	2	0.11959
Flexible RBC	2	0.03082
Flexible RBC	2	0.03941
Flexible RBC	2	0.0479
Flexible RBC	2	0.01505
Flexible RBC	2	0.06718
Flexible RBC	2	0.05502
Flexible RBC	2	0.04611
Flexible RBC	2	0.08744
Flexible RBC	2	0.08357
Flexible RBC	2	0.01182
Flexible RBC	2	0.06961
Flexible RBC	2	0.04238
Flexible RBC	2	0.02856
Flexible RBC	2	0.04354
Flexible RBC	2	0.03823
Flexible RBC	2	0.03164
Flexible RBC	2	0.06306
Flexible RBC	2	0.03438
Flexible RBC	2	0.06223
Flexible RBC	2	0.03682
Flexible RBC	2	0.08562
Flexible RBC	2	0.12327
Flexible RBC	2	0.08098
Flexible RBC	2	0.13801
Flexible RBC	2	0.07014
Flexible RBC	2	0.07076
Flexible RBC	2	0.04973
Flexible RBC	2	0.06061
Flexible RBC	2	0.07125
Flexible RBC	2	0.06054
Flexible RBC	2	0.10591
Flexible RBC	2	0.06598
Flexible RBC	2	0.04321
Flexible RBC	2	0.03226
Flexible RBC	2	0.05579
Flexible RBC	2	0.04517
Flexible RBC	2	0.04822
Flexible RBC	2	0.06432
Flexible RBC	2	0.0984
Flexible RBC	2	0.09583
Flexible RBC	2	0.09091
Flexible RBC	2	0.04817
Flexible RBC	2	0.07392
Flexible RBC	2	0.03766
Flexible RBC	2	0.05665
Flexible RBC	2	0.03299
Flexible RBC	2	0.09307
Flexible RBC	2	0.05059
Flexible RBC	2	0.10765
Flexible RBC	2	0.15405
Flexible RBC	2	0.06665
Flexible RBC	2	0.06183
Flexible RBC	2	0.04266
Flexible RBC	2	0.03509
Flexible RBC	2	0.0338
Flexible RBC	2	0.03634
Flexible RBC	2	0.00679
Flexible RBC	2	0.05295
Flexible RBC	2	0.02002
Flexible RBC	2	0.04134
Flexible RBC	2	0.15958
Flexible RBC	2	0.09528
Flexible RBC	2	0.09411
Flexible RBC	2	0.14456
Flexible RBC	2	0.04897
Flexible RBC	2	0.06072
Flexible RBC	2	0.05037
Flexible RBC	2	0.06715
Flexible RBC	2	0.0768
Flexible RBC	2	0.02921
Flexible RBC	2	0.01601
Flexible RBC	2	0.02431
Flexible RBC	2	0.03605
Flexible RBC	2	0.03612
Flexible RBC	2	0.0264
Flexible RBC	2	0.01813
Flexible RBC	2	0.04261
Flexible RBC	2	0.02019
Flexible RBC	2	0.01632
Flexible RBC	2	0.01476
Flexible RBC	2	0.03769
Flexible RBC	2	0.02426
Flexible RBC	2	0.00209
Flexible RBC	2	0.00838
Flexible RBC	2	0.14416
Flexible RBC	2	0.07213
Flexible RBC	2	0.07972
Flexible RBC	2	0.0826
Flexible RBC	2	0.08784
Flexible RBC	2	0.11654
Flexible RBC	2	0.14947
Flexible RBC	2	0.05717
Flexible RBC	2	0.04961
Flexible RBC	2	0.09068
Flexible RBC	2	0.10585
Flexible RBC	2	0.06861
Flexible RBC	2	0.08509
Flexible RBC	2	0.0946
Flexible RBC	2	0.06017
Flexible RBC	2	0.05614
Flexible RBC	2	0.07076
Flexible RBC	2	0.03081
Flexible RBC	2	0.13288
Flexible RBC	2	0.05496
Flexible RBC	2	0.03739
Flexible RBC	2	0.1073
Flexible RBC	2	0.05372
Flexible RBC	2	0.04233
Flexible RBC	2	0.13001
Flexible RBC	2	0.08838
Flexible RBC	2	0.07155
Flexible RBC	2	0.09271
Flexible RBC	2	0.04114
Flexible RBC	2	0.04365
Flexible RBC	2	0.01979
Flexible RBC	2	0.0581
Flexible RBC	2	0.0775
Flexible RBC	2	0.03914
Flexible RBC	2	0.02994
Flexible RBC	2	0.07027
Flexible RBC	2	0.04775
Flexible RBC	2	0.04979
Flexible RBC	2	0.11841
Flexible RBC	2	0.04657
Flexible RBC	2	0.05593
Flexible RBC	2	0.02787
Flexible RBC	2	0.02647
Flexible RBC	2	0.02165
Flexible RBC	2	0.0282
Flexible RBC	2	0.04497
Flexible RBC	2	0.02153
Flexible RBC	2	0.03477
Flexible RBC	2	0.14458
Flexible RBC	2	0.10004
Flexible RBC	2	0.04823
Flexible RBC	2	0.09483
Flexible RBC	2	0.1011
Flexible RBC	2	0.10287
Flexible RBC	2	0.10375
Flexible RBC	2	0.02555
Flexible RBC	2	0.04034
Flexible RBC	2	0.04425
Flexible RBC	2	0.06807
Flexible RBC	2	0.01525
Flexible RBC	2	0.07282
Flexible RBC	2	0.03745
Flexible RBC	2	0.09776
Flexible RBC	2	0.05551
Flexible RBC	2	0.01229
Flexible RBC	2	0.01698
Flexible RBC	2	0.01589
Flexible RBC	2	0.04582
Flexible RBC	2	0.01333
Flexible RBC	2	0.02868
Flexible RBC	2	0.01793
Flexible RBC	2	0.05436
Flexible RBC	2	0.12189
Flexible RBC	2	0.11954
Flexible RBC	2	0.08805
Flexible RBC	2	0.04407
Flexible RBC	2	0.03361
Flexible RBC	2	0.07558
Flexible RBC	2	0.05088
Flexible RBC	2	0.08492
Flexible RBC	2	0.04977
Flexible RBC	2	0.05291
Flexible RBC	2	0.03755
Flexible RBC	2	0.01766
Flexible RBC	2	0.08081
Flexible RBC	2	0.0399
Flexible RBC	2	0.02979
Flexible RBC	2	0.04735
Flexible RBC	2	0.02306
Flexible RBC	2	0.01065
Flexible RBC	2	0.05813
Flexible RBC	2	0.05917
Flexible RBC	2	0.04039
Flexible RBC	2	0.04223
Flexible RBC	2	0.04385
Flexible RBC	2	0.07132
Flexible RBC	2	0.05965
Flexible RBC	2	0.04031
Flexible RBC	2	0.06226
Flexible RBC	2	0.11741
Flexible RBC	2	0.06287
Flexible RBC	2	0.06376
Flexible RBC	2	0.15095
Flexible RBC	2	0.03976
Flexible RBC	2	0.0451
Flexible RBC	2	0.05696
Flexible RBC	2	0.02124
Flexible RBC	2	0.04526
Flexible RBC	2	0.01253
Flexible RBC	2	0.07432
Flexible RBC	2	0.06813
Flexible RBC	2	0.04987
Flexible RBC	2	0.01512
Flexible RBC	2	0.02858
Flexible RBC	2	0.06144
Flexible RBC	2	0.01128
Flexible RBC	2	0.01782
Flexible RBC	2	0.03659
Flexible RBC	2	0.03061
Flexible RBC	2	0.05523
Flexible RBC	2	0.11981
Flexible RBC	2	0.13025
Flexible RBC	2	0.05723
Flexible RBC	2	0.06661
Flexible RBC	2	0.07932
Flexible RBC	2	0.046
Flexible RBC	2	0.08927
Flexible RBC	2	0.01938
Flexible RBC	2	0.0207
Flexible RBC	2	0.02851
Flexible RBC	2	0.04018
Flexible RBC	2	0.0337
Flexible RBC	2	0.00697
Flexible RBC	2	0.00633
Flexible RBC	2	0.02948
Flexible RBC	2	0.04518
Flexible RBC	2	0.07543
Flexible RBC	2	0.01173
Flexible RBC	2	0.03466
Flexible RBC	2	0.00683
Flexible RBC	2	0.12031
Flexible RBC	2	0.14714
Flexible RBC	2	0.12197
Flexible RBC	2	0.11901
Flexible RBC	2	0.08389
Flexible RBC	2	0.01759
Flexible RBC	2	0.04509
Flexible RBC	2	0.07967
Flexible RBC	2	0.03436
Flexible RBC	2	0.11549
Flexible RBC	2	0.0538
Flexible RBC	2	0.04044
Flexible RBC	2	0.04298
Flexible RBC	2	0.02268
Flexible RBC	2	0.01931
Flexible RBC	2	0.02801
Flexible RBC	2	0.0236
Flexible RBC	2	0.02753
Flexible RBC	2	0.02388
Flexible RBC	2	0.02687
Flexible RBC	2	0.00975
Flexible RBC	2	0.03494
Flexible RBC	2	0.01208
Flexible RBC	2	0.0278
Flexible RBC	2	0.03601
Flexible RBC	2	0.07586
Flexible RBC	2	0.09901
Flexible RBC	2	0.0869
Flexible RBC	2	0.0899
Flexible RBC	2	0.08943
Flexible RBC	2	0.141
Flexible RBC	2	0.06501
Flexible RBC	2	0.0211
Flexible RBC	2	0.05388
Flexible RBC	2	0.06165
Flexible RBC	2	0.02295
Flexible RBC	2	0.04749
Flexible RBC	2	0.08578
Flexible RBC	2	0.04401
Flexible RBC	2	0.04652
Flexible RBC	2	0.03941
Flexible RBC	2	0.06086
Flexible RBC	2	0.02418
Flexible RBC	2	0.03121
Flexible RBC	2	0.01072
Flexible RBC	2	0.05337
Flexible RBC	2	0.07519
Flexible RBC	2	0.07017
Flexible RBC	2	0.06764
Flexible RBC	2	0.02771
Flexible RBC	2	0.03851
Flexible RBC	2	0.10699
Flexible RBC	2	0.11001
Flexible RBC	2	0.07326
Flexible RBC	2	0.01344
Flexible RBC	2	0.0407
Flexible RBC	2	0.02168
Flexible RBC	2	0.01732
Flexible RBC	2	0.01337
Flexible RBC	2	0.04835
Flexible RBC	2	0.03814
Flexible RBC	2	0.04767
Flexible RBC	2	0.0221
Flexible RBC	2	0.06492
Flexible RBC	2	0.02288
Flexible RBC	2	0.00612
Flexible RBC	2	0.02347
Flexible RBC	2	0.04549
Flexible RBC	2	0.03325
Flexible RBC	2	0.16155
Flexible RBC	2	0.08262
Flexible RBC	2	0.07185
Flexible RBC	2	0.08354
Flexible RBC	2	0.07193
Flexible RBC	2	0.02539
Flexible RBC	2	0.09566
Flexible RBC	2	0.11922
Flexible RBC	2	0.03409
Flexible RBC	2	0.09335
Flexible RBC	2	0.03582
Flexible RBC	2	0.09872
Flexible RBC	2	0.03949
Flexible RBC	2	0.01043
Flexible RBC	2	0.03577
Flexible RBC	2	0.05388
Flexible RBC	2	0.03467
Flexible RBC	2	0.05917
Flexible RBC	2	0.0209
Flexible RBC	2	0.00912
Flexible RBC	2	0.05154
Flexible RBC	2	0.03414
Flexible RBC	2	0.03064
Flexible RBC	2	0.02639
Flexible RBC	2	0.05256
Flexible RBC	2	0.03208
Flexible RBC	2	0.07715
Flexible RBC	2	0.02829
Flexible RBC	2	0.07221
Flexible RBC	2	0.06675
Flexible RBC	2	0.14148
Flexible RBC	2	0.05557
Flexible RBC	2	0.12367
Flexible RBC	2	0.13406
Flexible RBC	2	0.05046
Flexible RBC	2	0.06637
Flexible RBC	2	0.03191
Flexible RBC	2	0.04831
Flexible RBC	2	0.07097
Flexible RBC	2	0.03373
Flexible RBC	2	0.01659
Flexible RBC	2	0.04027
Flexible RBC	2	0.04575
Flexible RBC	2	0.02812
Flexible RBC	2	0.04624
Flexible RBC	2	0.08862
Flexible RBC	2	0.06765
Flexible RBC	2	0.12765
Flexible RBC	2	0.07468
Flexible RBC	2	0.14093
Flexible RBC	2	0.01752
Flexible RBC	2	0.02215
Flexible RBC	2	0.02172
Flexible RBC	2	0.03822
Flexible RBC	2	0.03681
Flexible RBC	2	0.04687
Flexible RBC	2	0.02823
Flexible RBC	2	0.03571
Flexible RBC	2	0.0335
Flexible RBC	2	0.00898
Flexible RBC	2	0.03794
Flexible RBC	2	0.02911
Flexible RBC	2	0.08393
Flexible RBC	2	0.07061
Flexible RBC	2	0.02233
Flexible RBC	2	0.04366
Flexible RBC	2	0.01344
Flexible RBC	2	0.02113
Flexible RBC	2	0.07301
Flexible RBC	2	0.10609
Flexible RBC	2	0.10199
Flexible RBC	2	0.03212
Flexible RBC	2	0.02541
Flexible RBC	2	0.02487
Flexible RBC	2	0.02917
Flexible RBC	2	0.02371
Flexible RBC	2	0.05957
Flexible RBC	2	0.07296
Flexible RBC	2	0.06527
Flexible RBC	2	0.02793
Flexible RBC	2	0.01345
Flexible RBC	2	0.02453
Flexible RBC	2	0.06621
Flexible RBC	2	0.08257
Flexible RBC	2	0.02688
Flexible RBC	2	0.06855
Flexible RBC	2	0.05211
Flexible RBC	2	0.03259
Flexible RBC	2	0.00959
Flexible RBC	2	0.0487
Flexible RBC	2	0.04993
Flexible RBC	2	0.02459
Flexible RBC	2	0.14022
Flexible RBC	2	0.08396
Flexible RBC	2	0.07495
Flexible RBC	2	0.02588
Flexible RBC	2	0.06485
Flexible RBC	2	0.02086
Flexible RBC	2	0.04541
Flexible RBC	2	0.03812
Flexible RBC	2	0.04628
Flexible RBC	2	0.03864
Flexible RBC	2	0.05015
Flexible RBC	2	0.04135
Flexible RBC	2	0.00711
Flexible RBC	2	0.04165
Flexible RBC	2	0.05511
Flexible RBC	2	0.02426
Flexible RBC	2	0.05848
Flexible RBC	2	0.03687
Flexible RBC	2	0.08212
Flexible RBC	2	0.0444
Flexible RBC	2	0.05061
Flexible RBC	2	0.01626
Flexible RBC	2	0.04118
Flexible RBC	2	0.02878
Flexible RBC	2	0.14187
Flexible RBC	2	0.08665
Flexible RBC	2	0.08719
Flexible RBC	2	0.14173
Flexible RBC	2	0.02661
Flexible RBC	2	0.07558
Flexible RBC	2	0.06037
Flexible RBC	2	0.04024
Flexible RBC	2	0.07197
Flexible RBC	2	0.07052
Flexible RBC	2	0.15682
Flexible RBC	2	0.0986
Flexible RBC	2	0.06181
Flexible RBC	2	0.04958
[truncated: 1,936 more rows]
