# Supplementary figures and images for: Stochastic bond dynamics facilitates alignment of malaria parasite at erythrocyte membrane upon invasion
Source: eLife journal article supplement (doi:10.7554/elife.56500), 2020-05-18

# Experiments

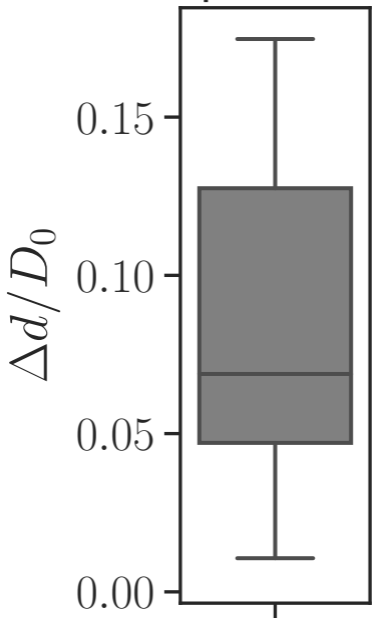

Supplement: fig2-data1 [file elife-56500-fig2-data1-v2.zip]

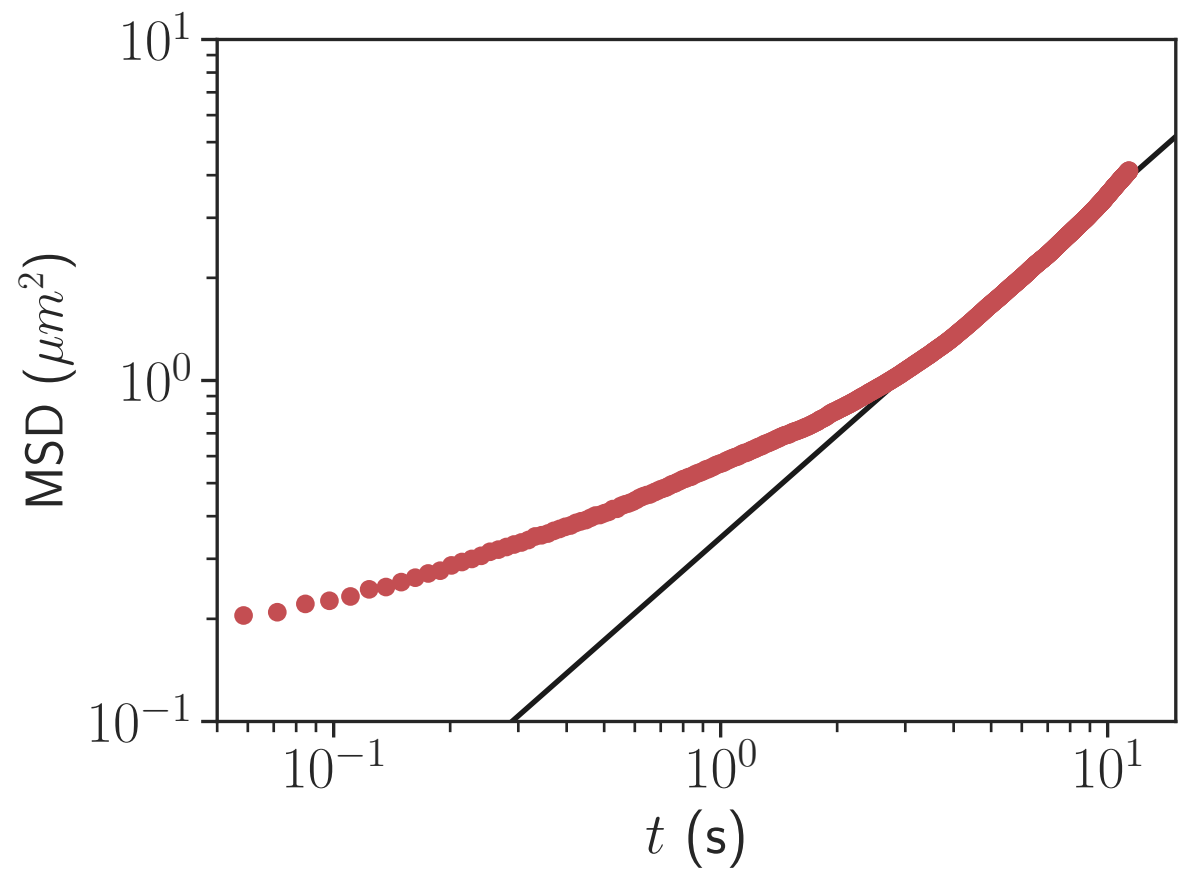

Supplement: fig2-data1 [file elife-56500-fig2-data1-v2.zip]

# Simulations

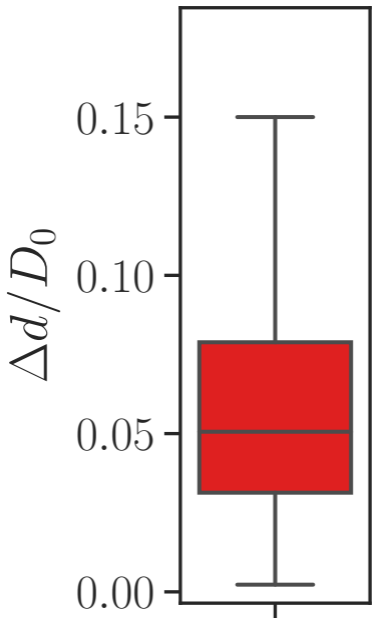

Supplement: fig2-data1 [file elife-56500-fig2-data1-v2.zip]
